# Supplementary material for: Formylation of Electron-Rich Aromatic Rings Mediated by Dichloromethyl Methyl Ether and TiCl4: Scope and Limitations
Source: Molecules. 2015 Mar 26;20(4):5409–22. doi: 10.3390/molecules20045409 (PMC6272369; doi:10.3390/molecules20045409)
Supplement: Supplementary file 1 [file molecules-20-05409-s001.pdf]

# Supplementary Materials

## Table of Contents

1. Nuclear magnetic resonance (NMR)
2. High performance liquid chromatography (HPLC): Reaction crudes
3. Resume table of the results for the formylation reaction.

## 1. NMR SPECTRA

### ➤ Entry 1: Reaction with phenol

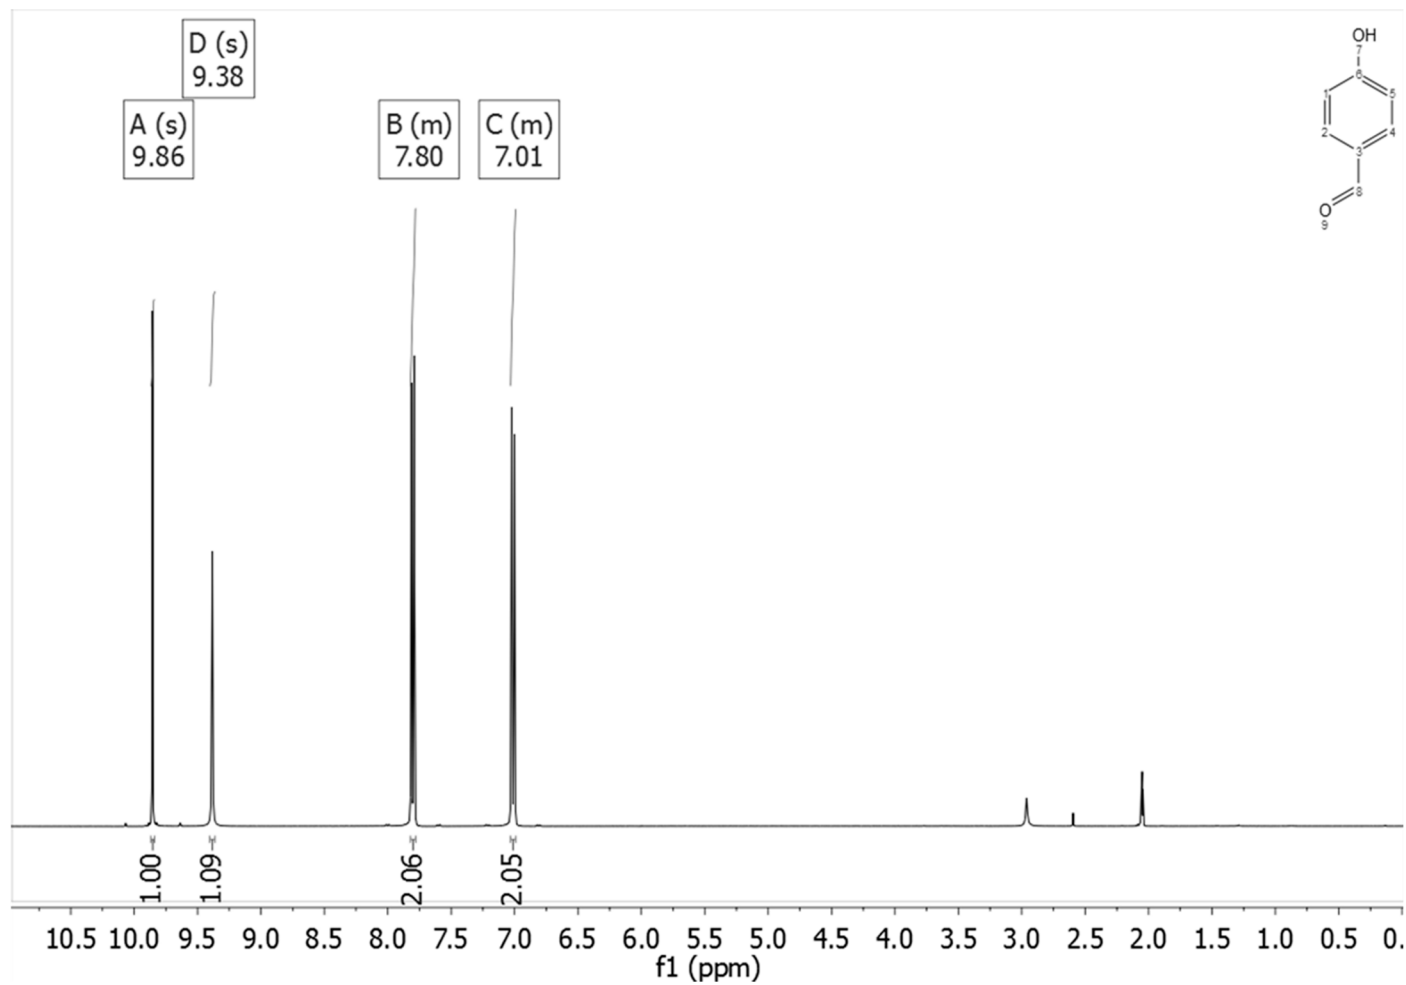

**Figure S1.**  $^1\text{H}$ -NMR (400 MHz,  $\text{C}_3\text{D}_6\text{O}$ ): **2**.

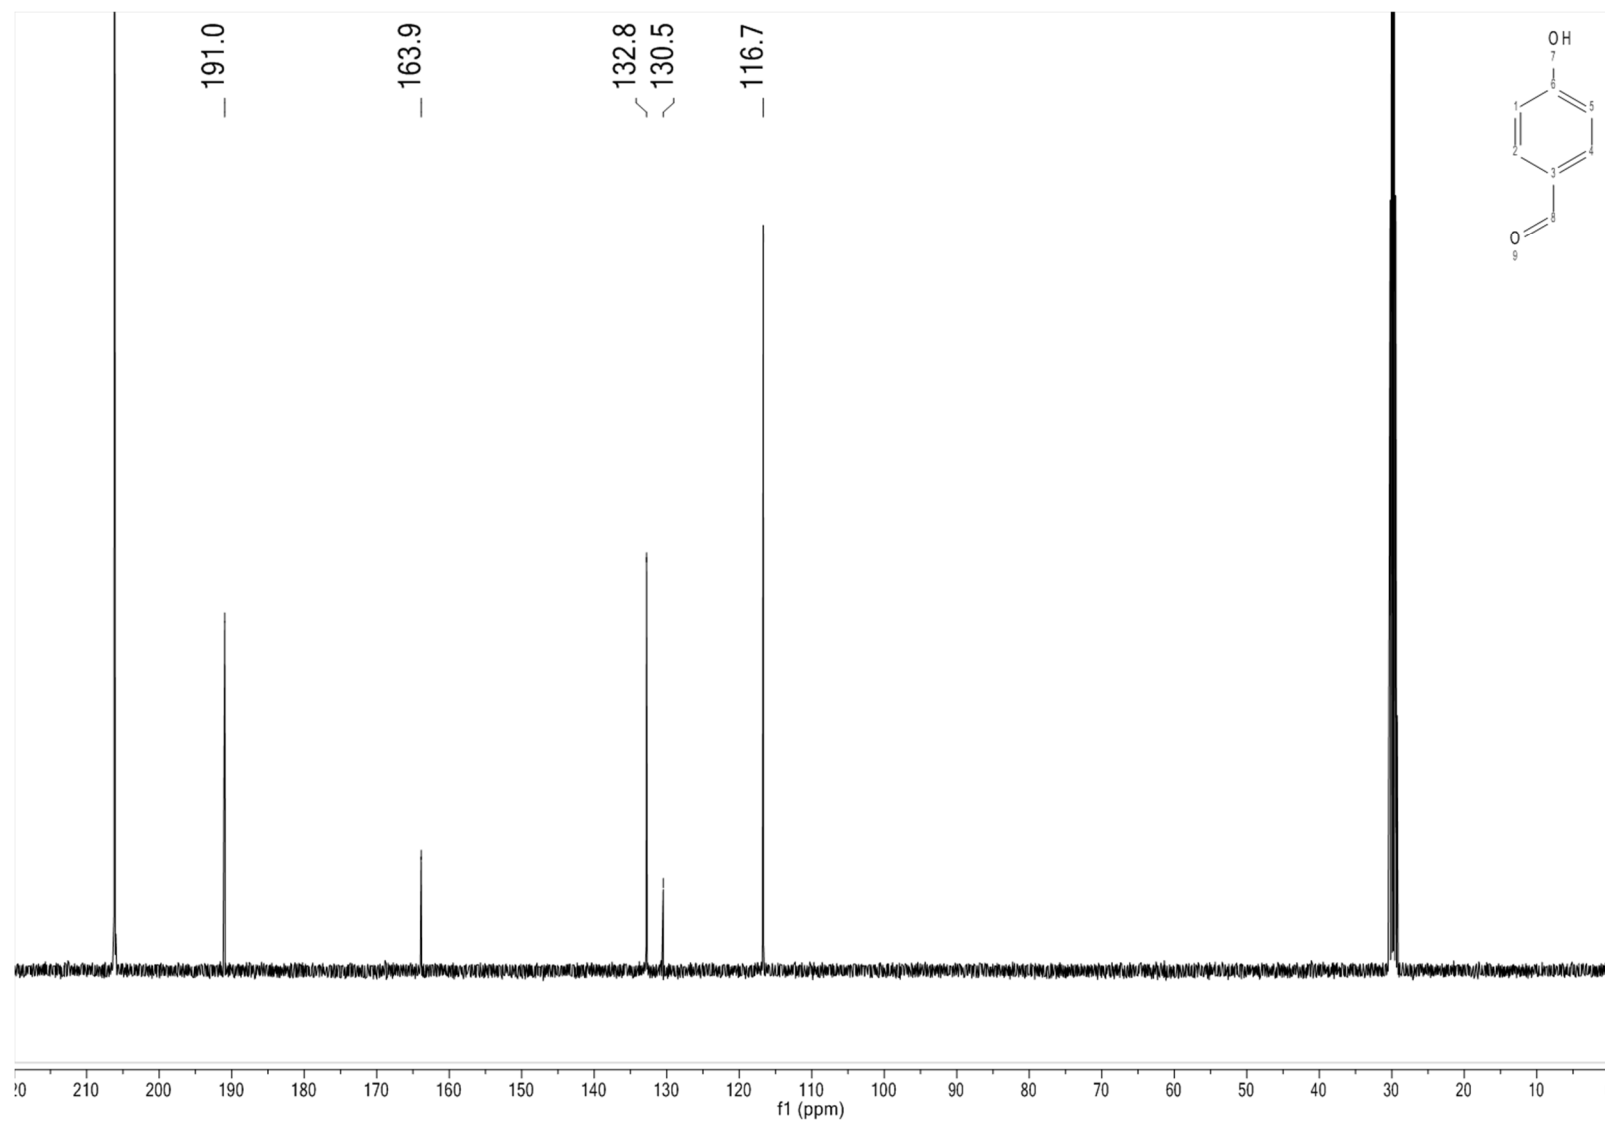

**Figure S2.**  $^{13}\text{C}$ -NMR (100 MHz,  $\text{C}_3\text{D}_6\text{O}$ ): **2**.

## ➤ Entry 2: Reaction with 3-methylphenol

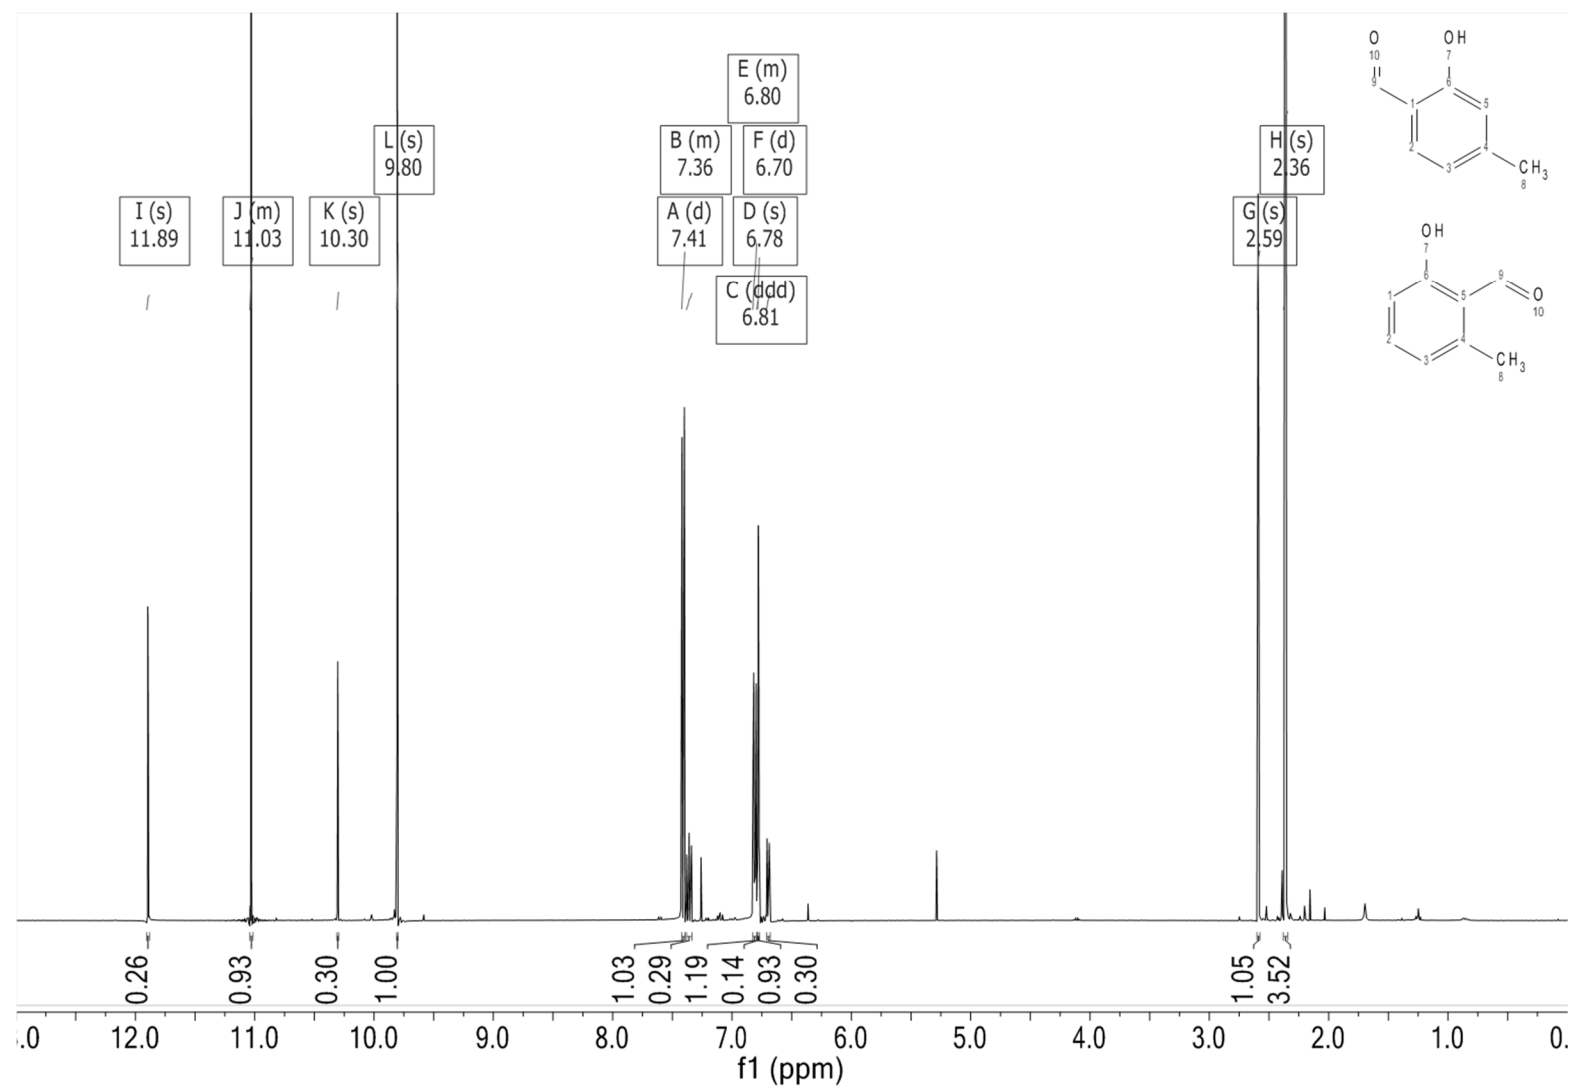Figure S3. <sup>1</sup>H-NMR (400 MHz, C<sub>3</sub>D<sub>3</sub>O): **3** and **4**.

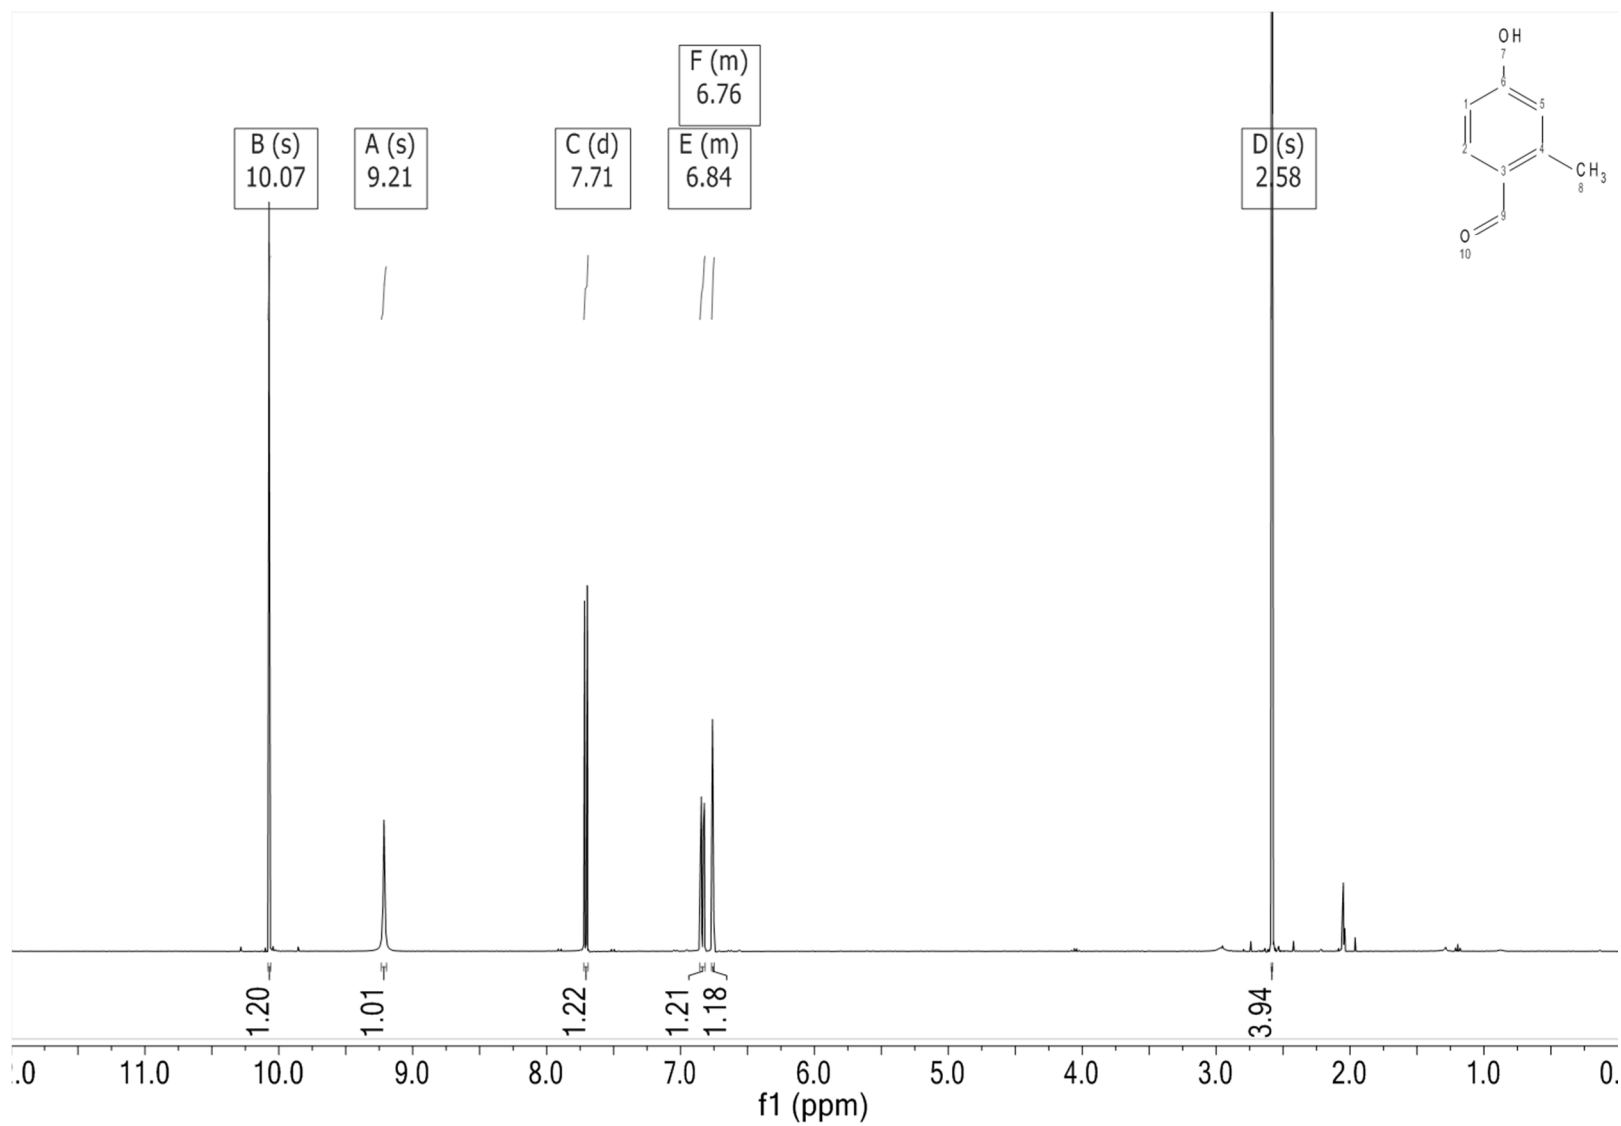

**Figure S4.**  $^1\text{H}$ -NMR (400 MHz,  $\text{C}_3\text{D}_3\text{O}$ ): **5**.

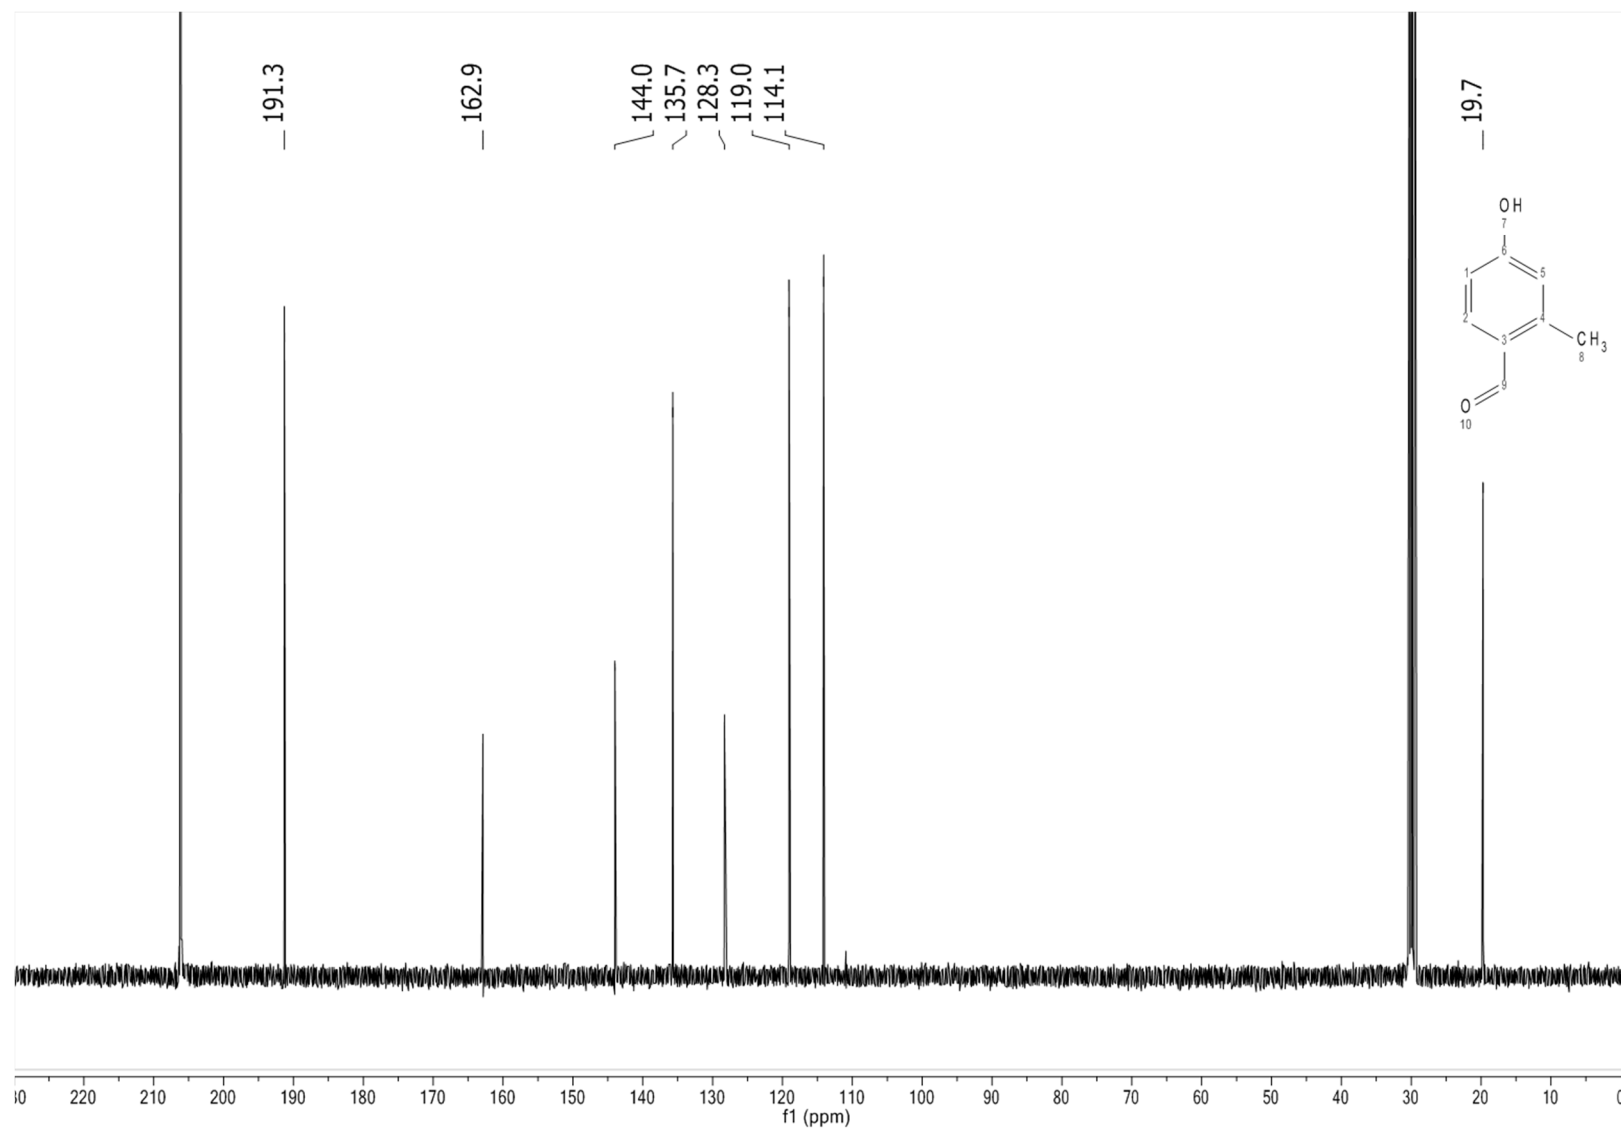

**Figure S5.**  $^{13}\text{C}$ -NMR (100 MHz,  $\text{C}_3\text{D}_6\text{O}$ ): **5**.

## ➤ Entry 3: Reaction with 3-methoxyphenol

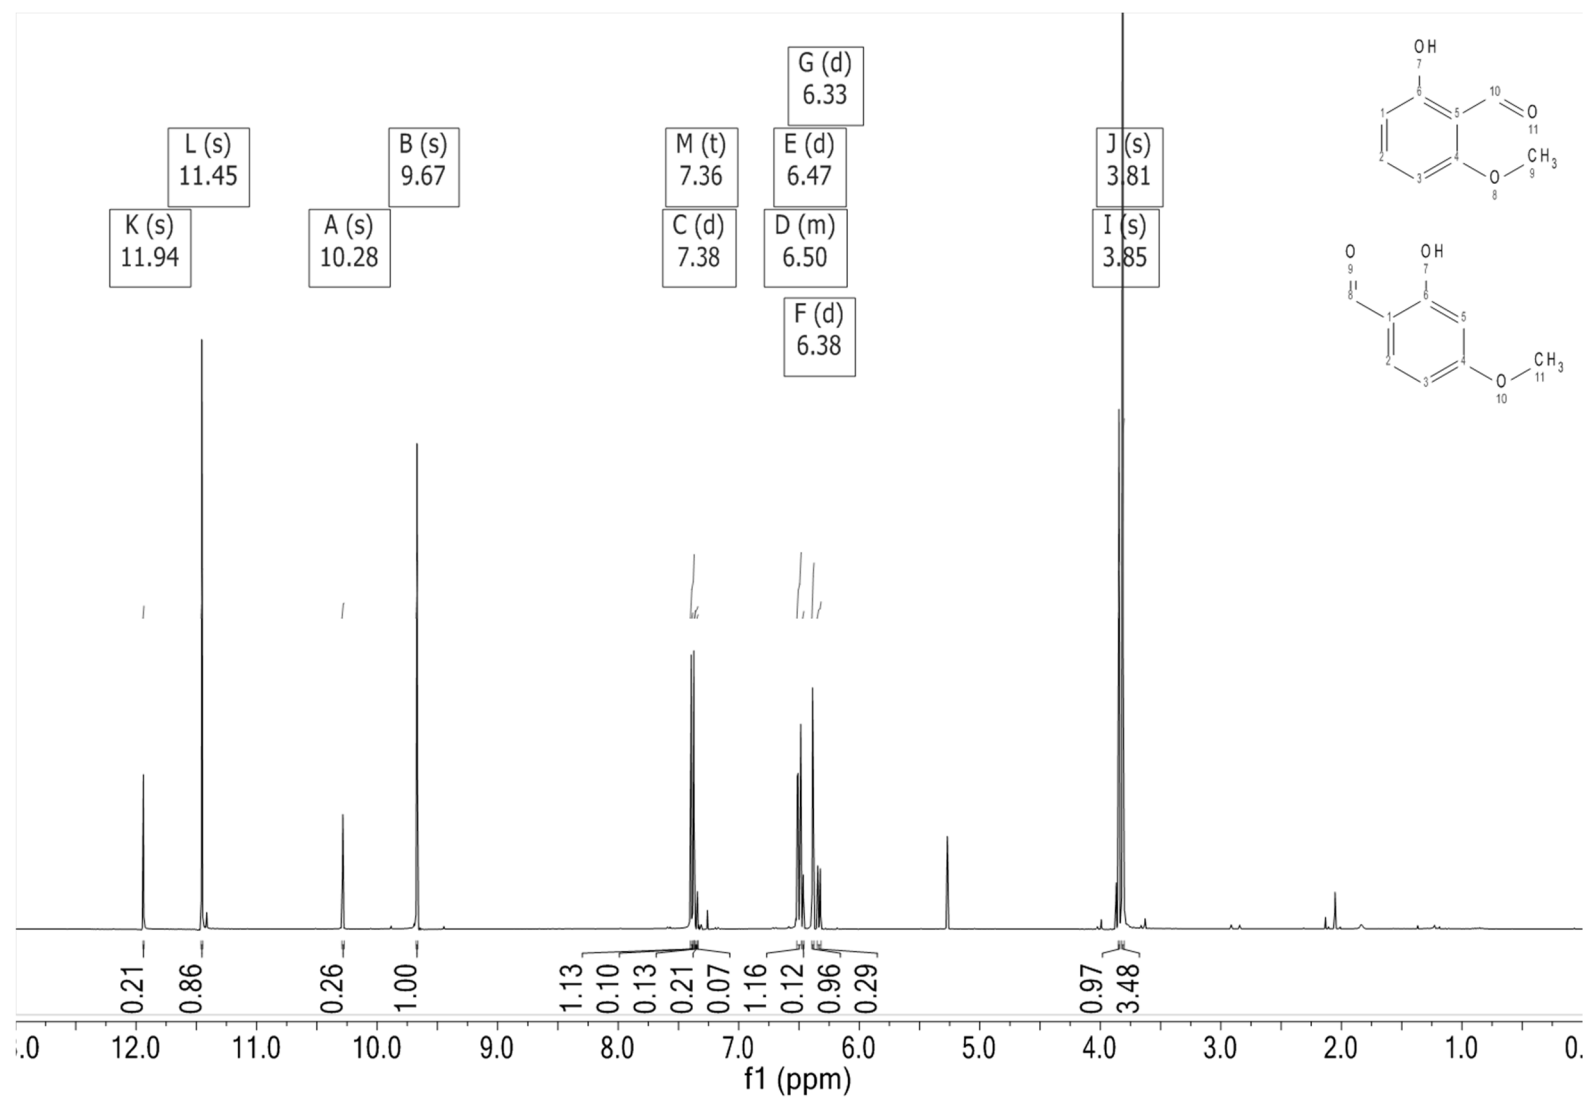**Figure S6.**  $^1\text{H}$ -NMR (400 MHz,  $\text{C}_3\text{D}_8\text{O}$ ): **6** and **7**.

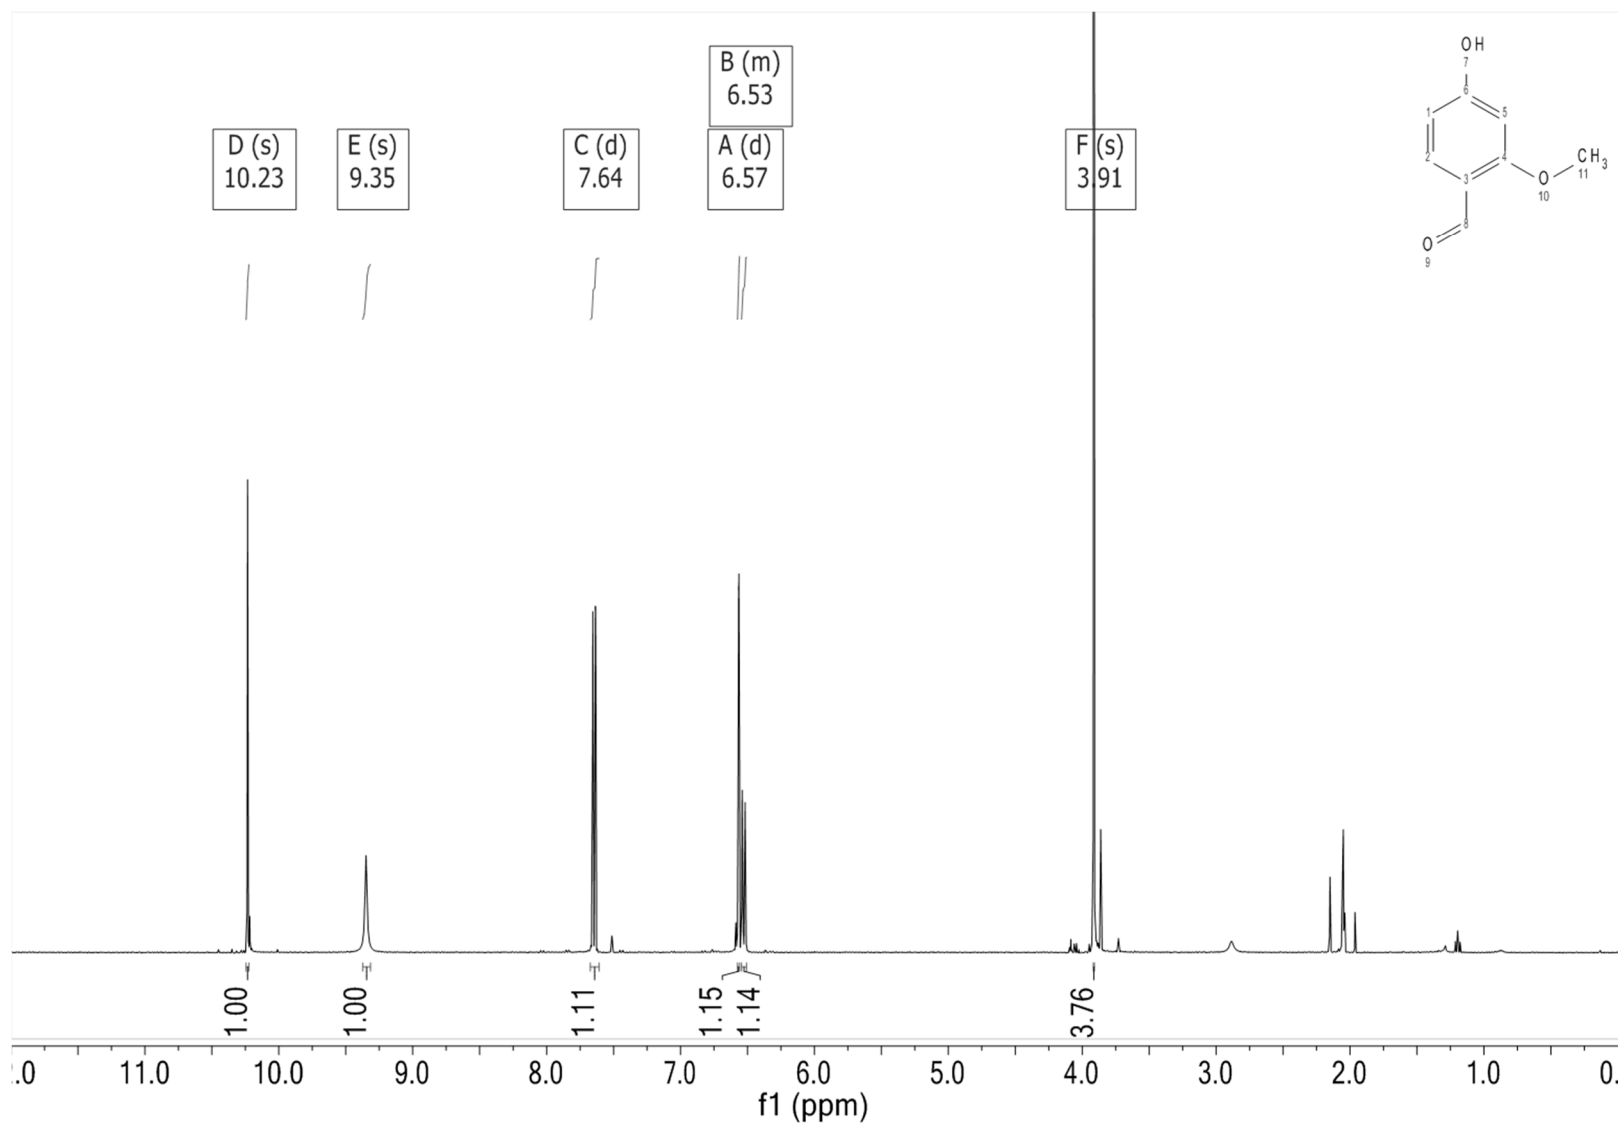

**Figure S7.**  $^1\text{H}$ -NMR (400 MHz,  $\text{C}_3\text{D}_3\text{O}$ ): **8**.

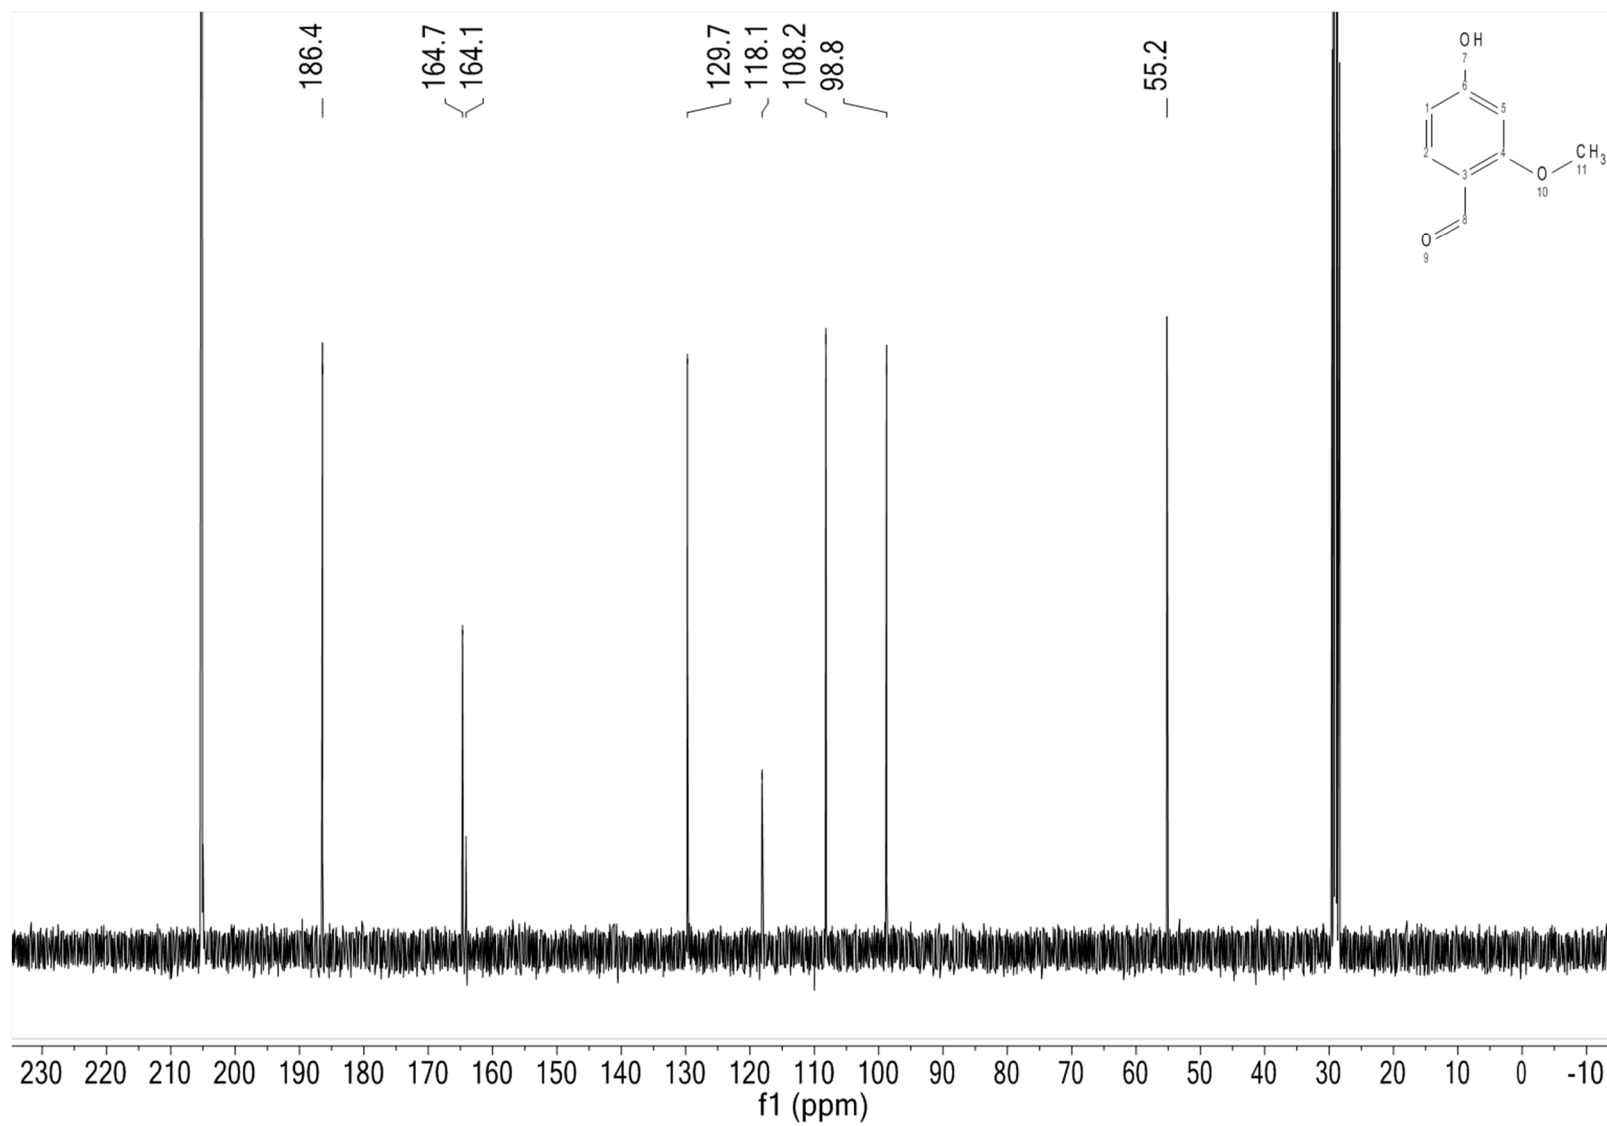

**Figure S8.** <sup>13</sup>C-NMR (100 MHz, C<sub>3</sub>D<sub>3</sub>O): **8**.

## ➤ Entry 4: Reaction with 3,5-dimethylphenol

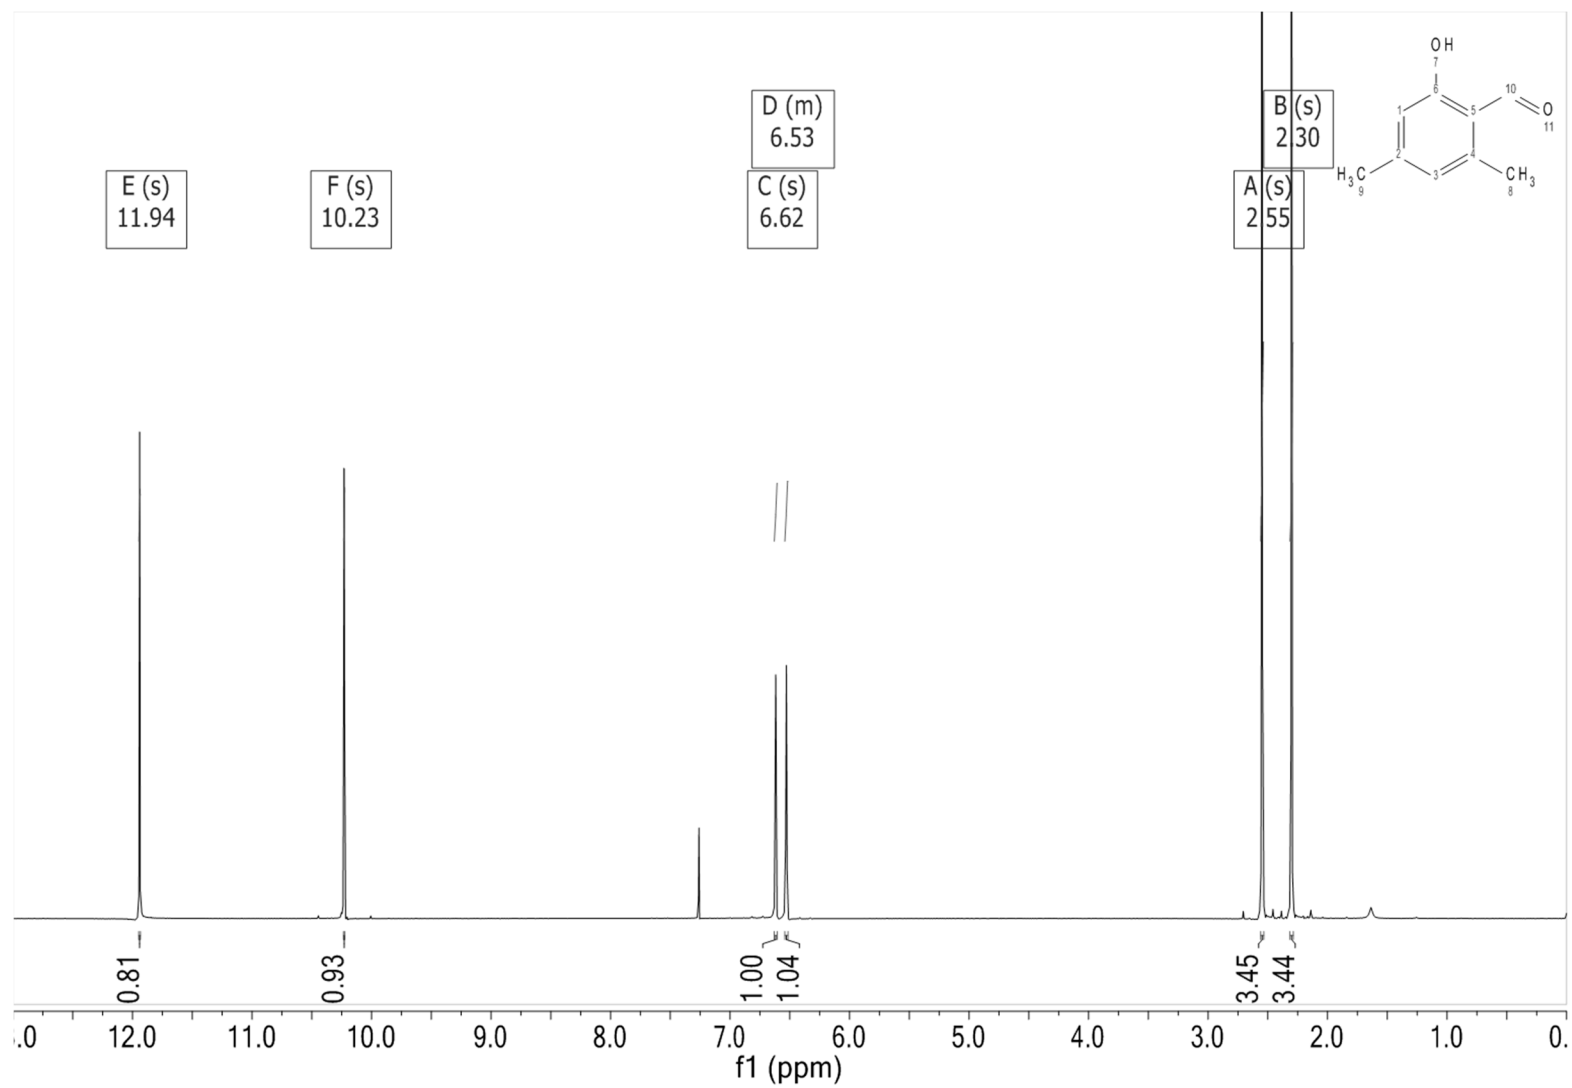**Figure S9.** <sup>1</sup>H-NMR (400 MHz, CDCl<sub>3</sub>): **9**.

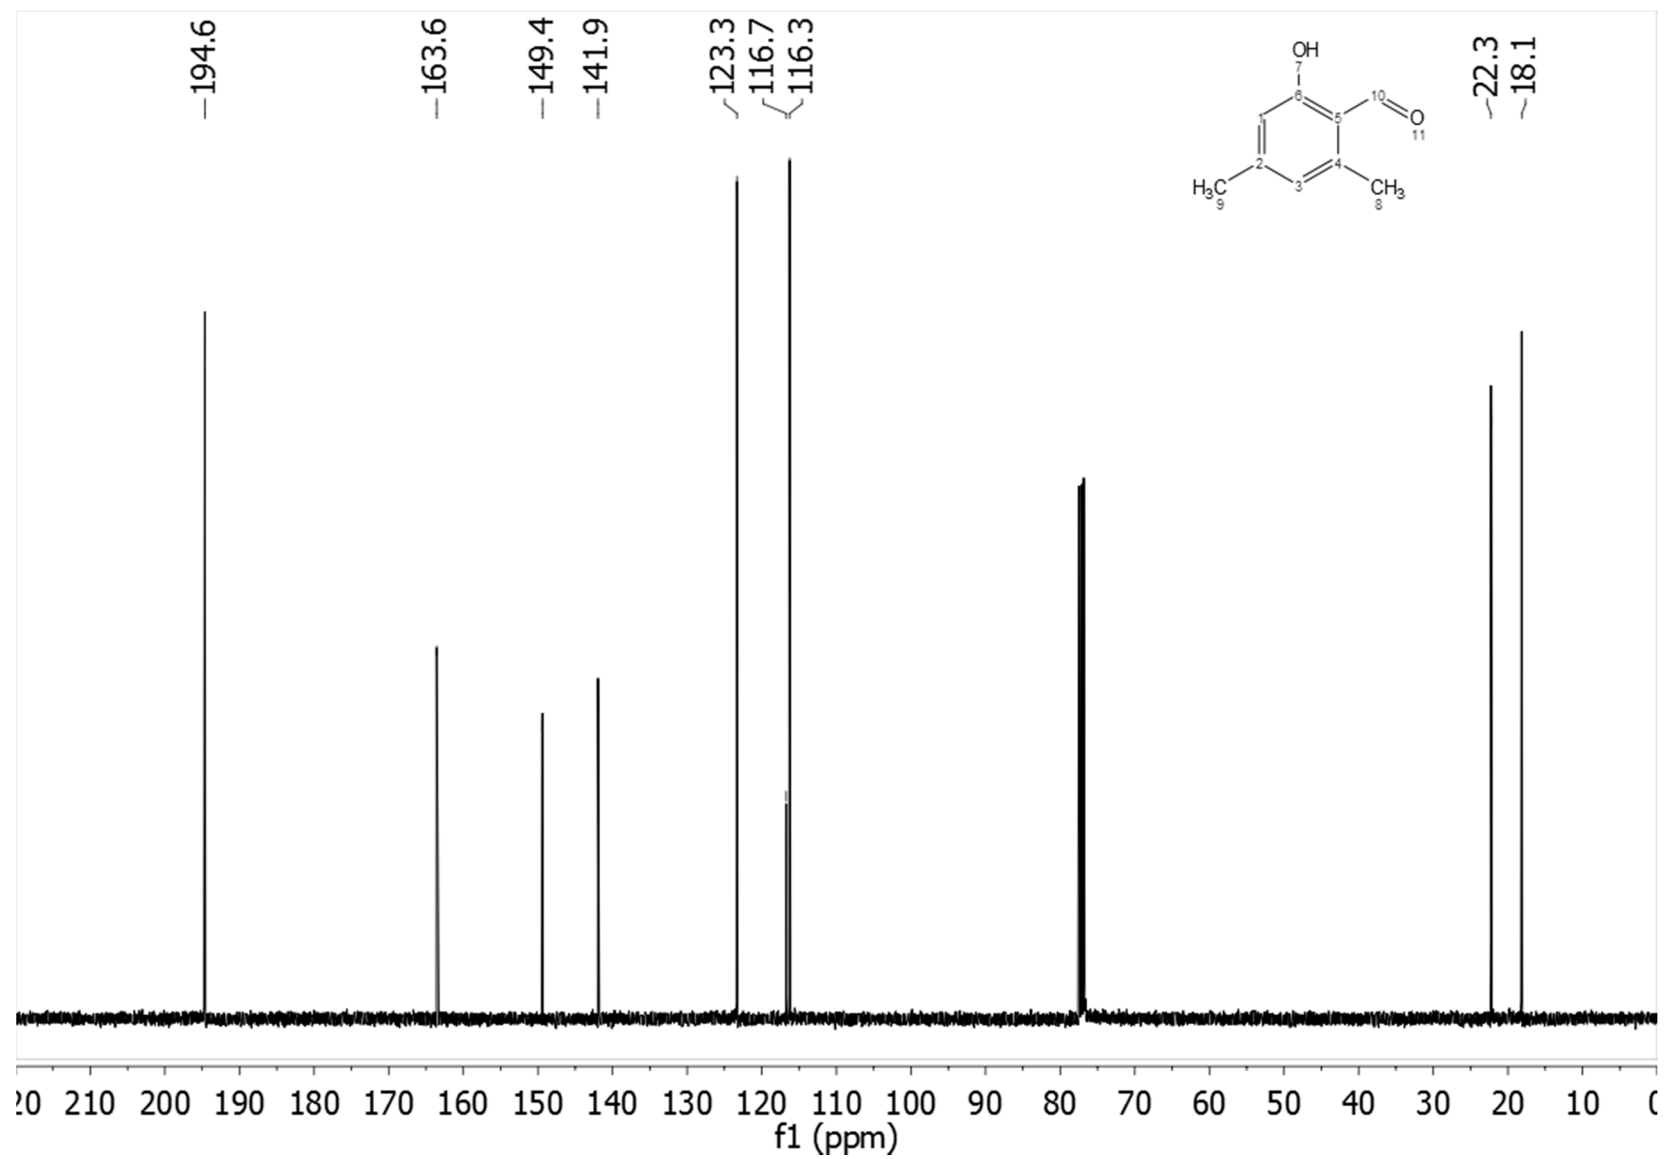

Figure S10.  $^{13}\text{C}$ -NMR (100 MHz,  $\text{CDCl}_3$ ): **9**.

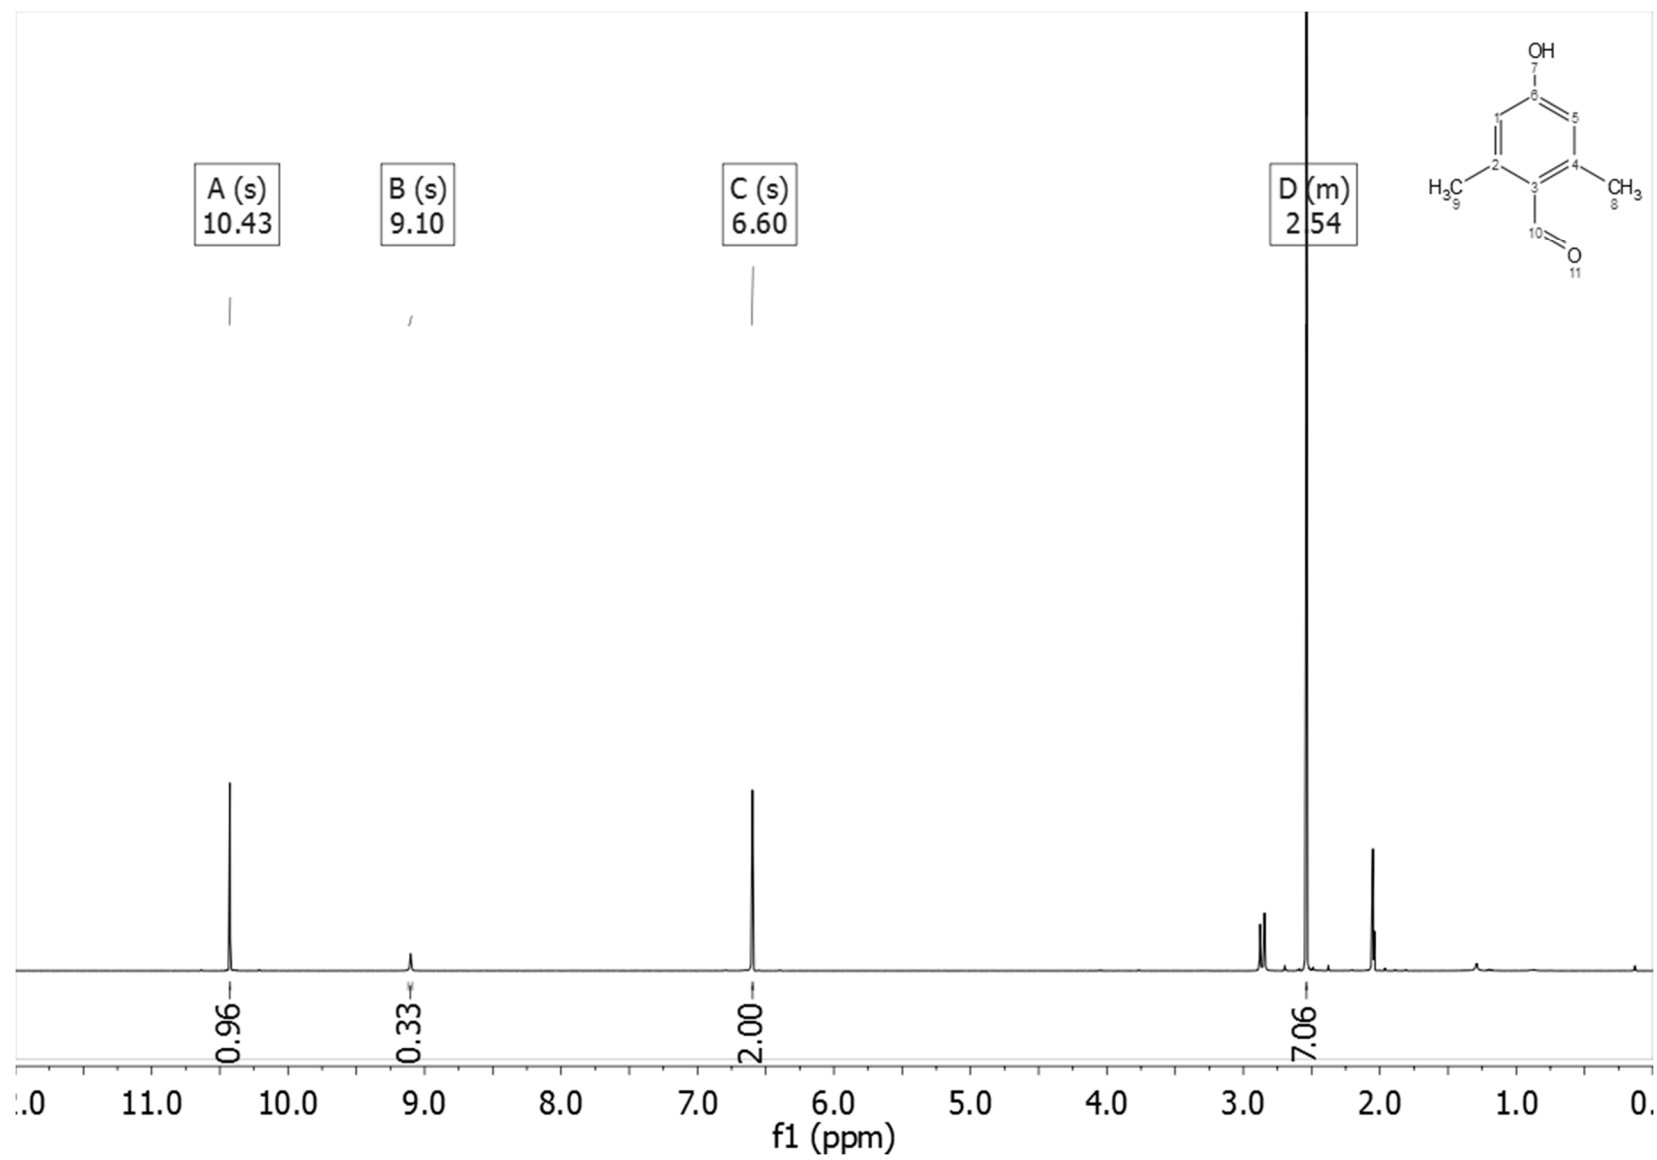

**Figure S11.**  $^1\text{H}$ -NMR (400 MHz,  $\text{C}_3\text{D}_6\text{O}$ ): **10**.

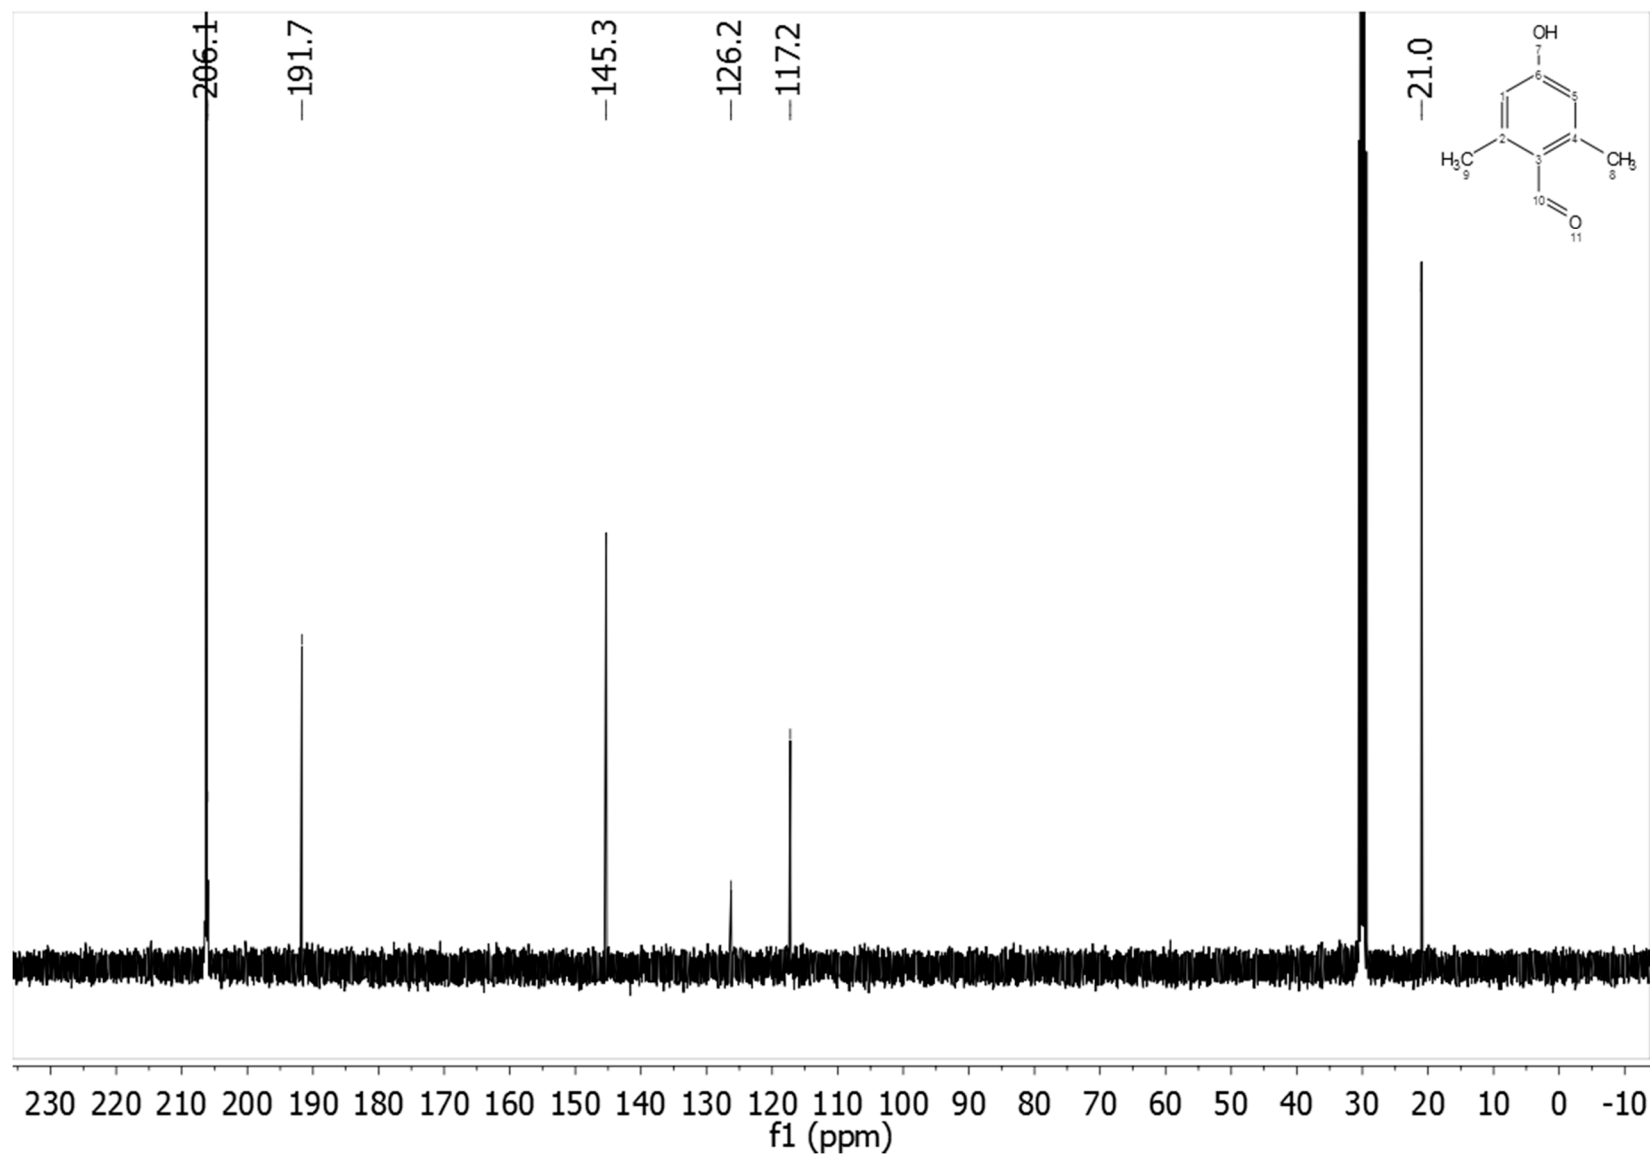

Figure S12.  $^{13}\text{C}$ -NMR (100 MHz,  $\text{C}_3\text{D}_6\text{O}$ ): **10**.

## ➤ Entry 5: Reaction with 3,5-dimethoxyphenol:

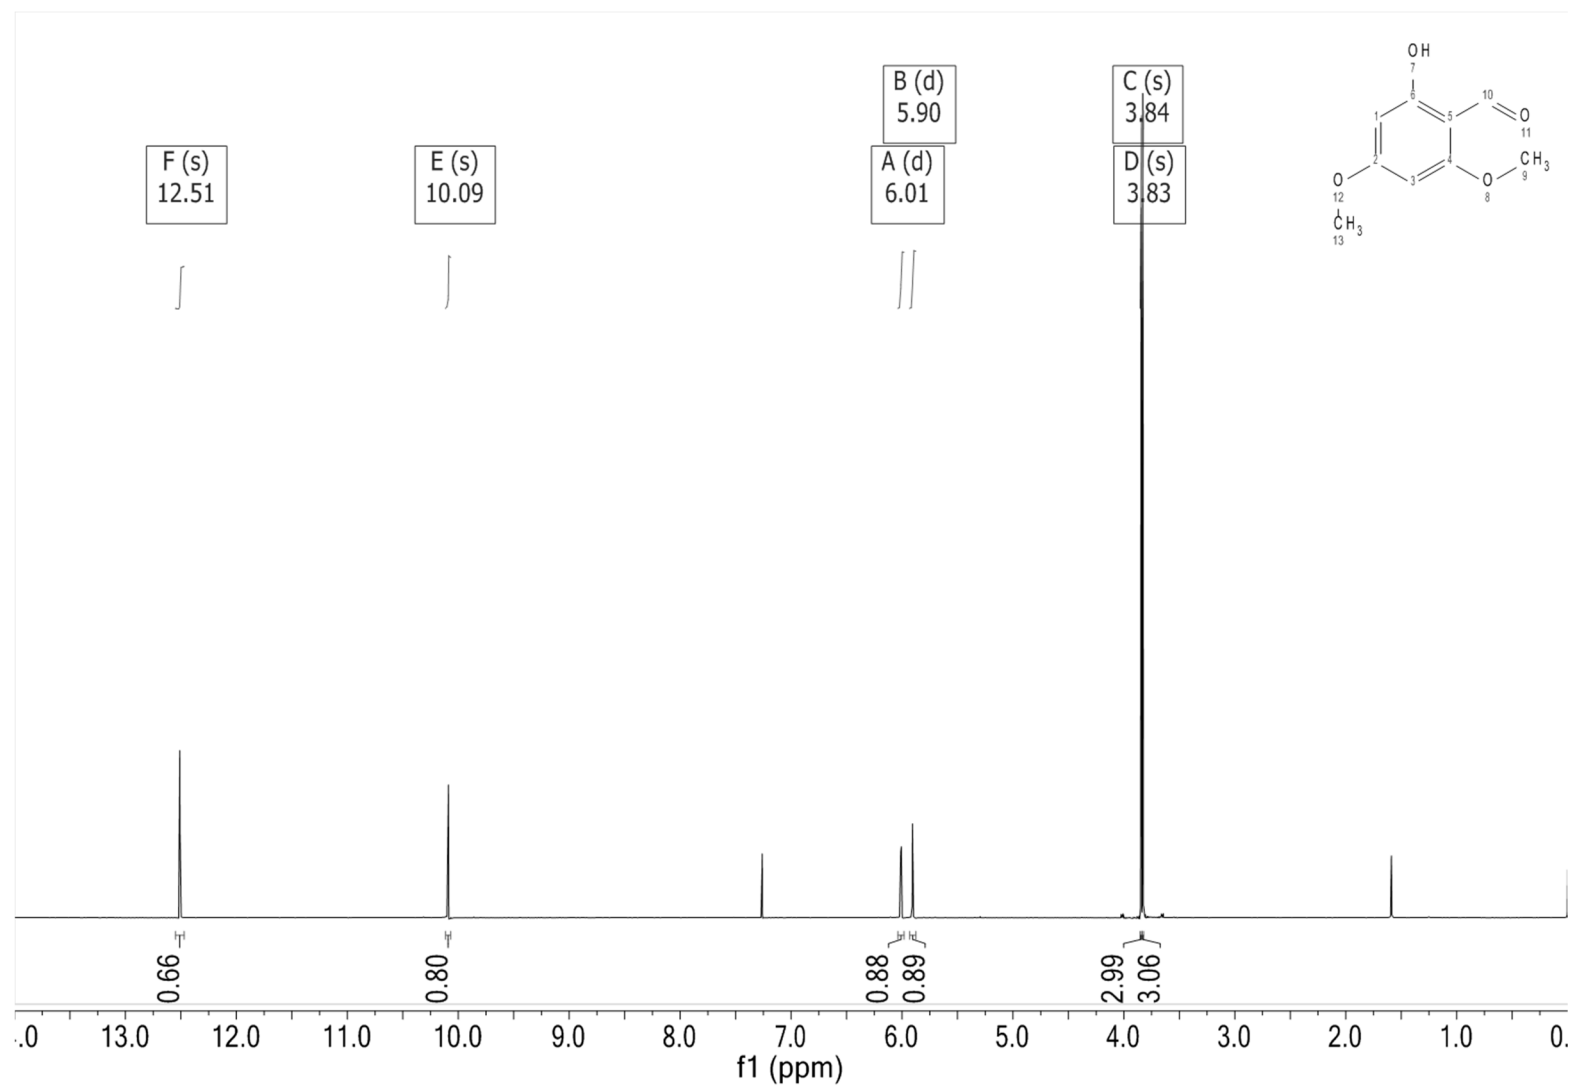Figure S13. <sup>1</sup>H-NMR (400 MHz, CDCl<sub>3</sub>): 11.

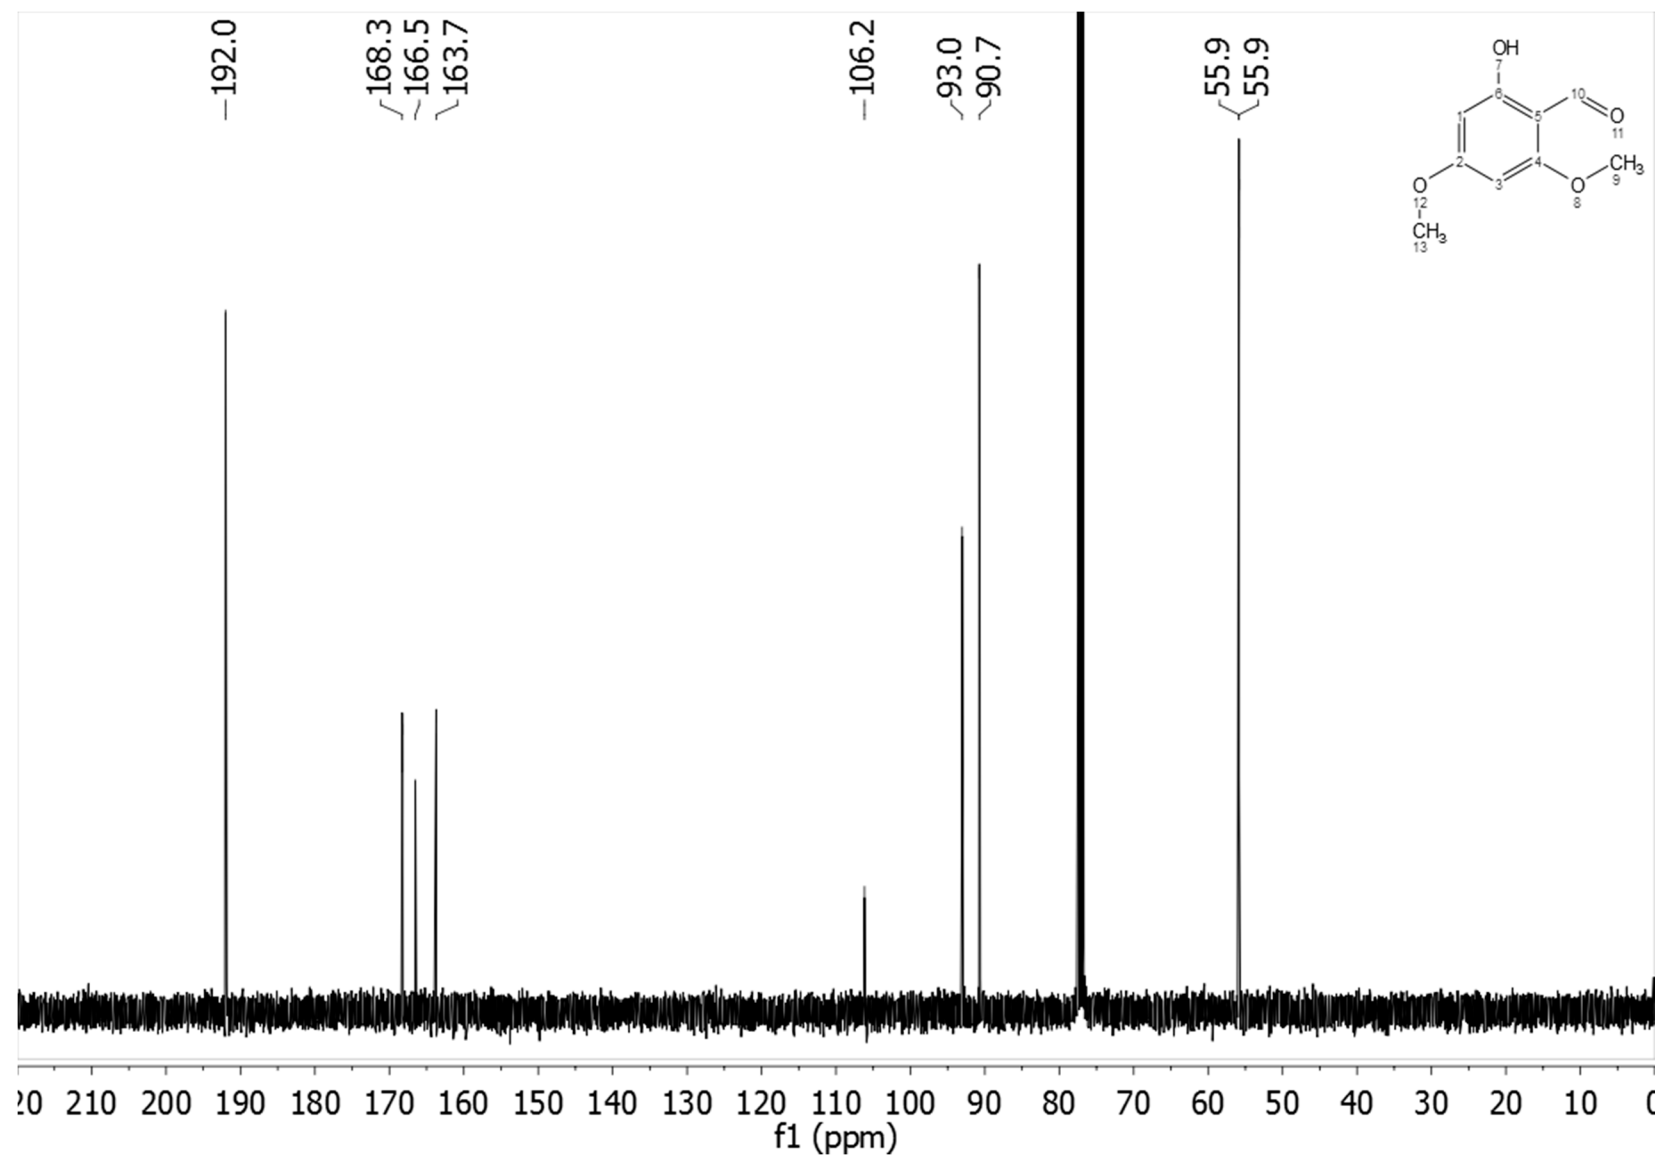

**Figure S14.**  $^{13}\text{C}$ -NMR (100 MHz,  $\text{CDCl}_3$ ): **11**.

## ➤ Entry 6: Reaction with 3,4,5-trimethylphenol

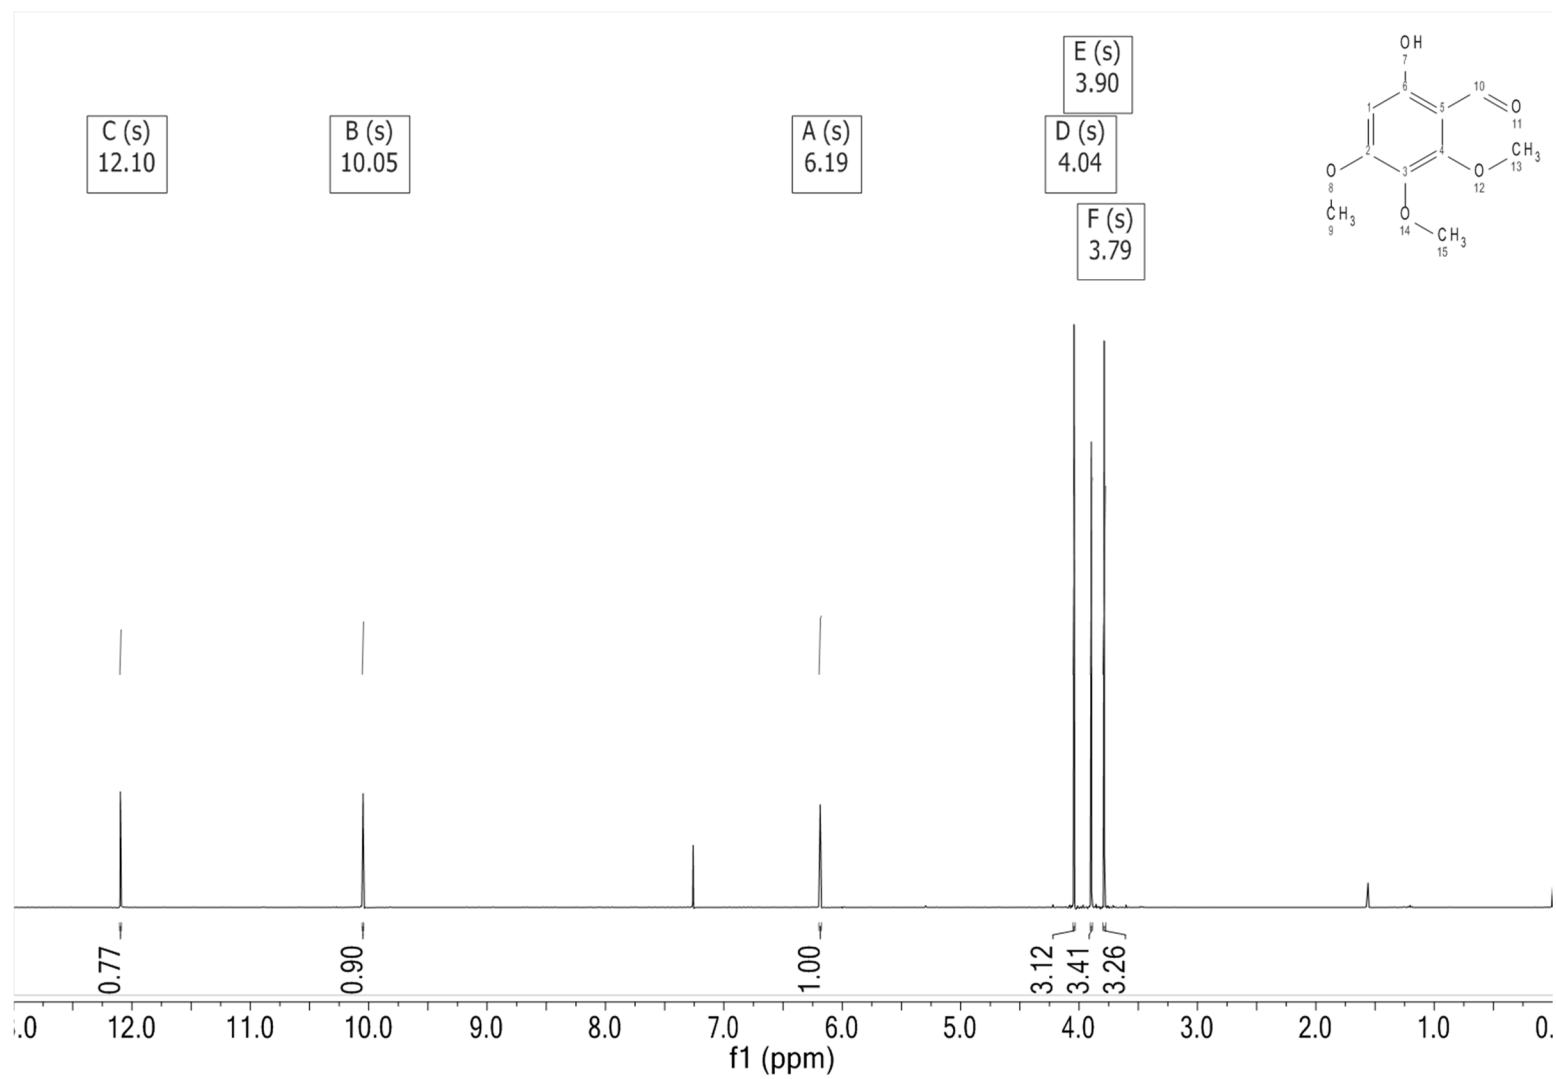**Figure S15.**  $^1\text{H}$ -NMR (400 MHz,  $\text{CDCl}_3$ ): **12**.

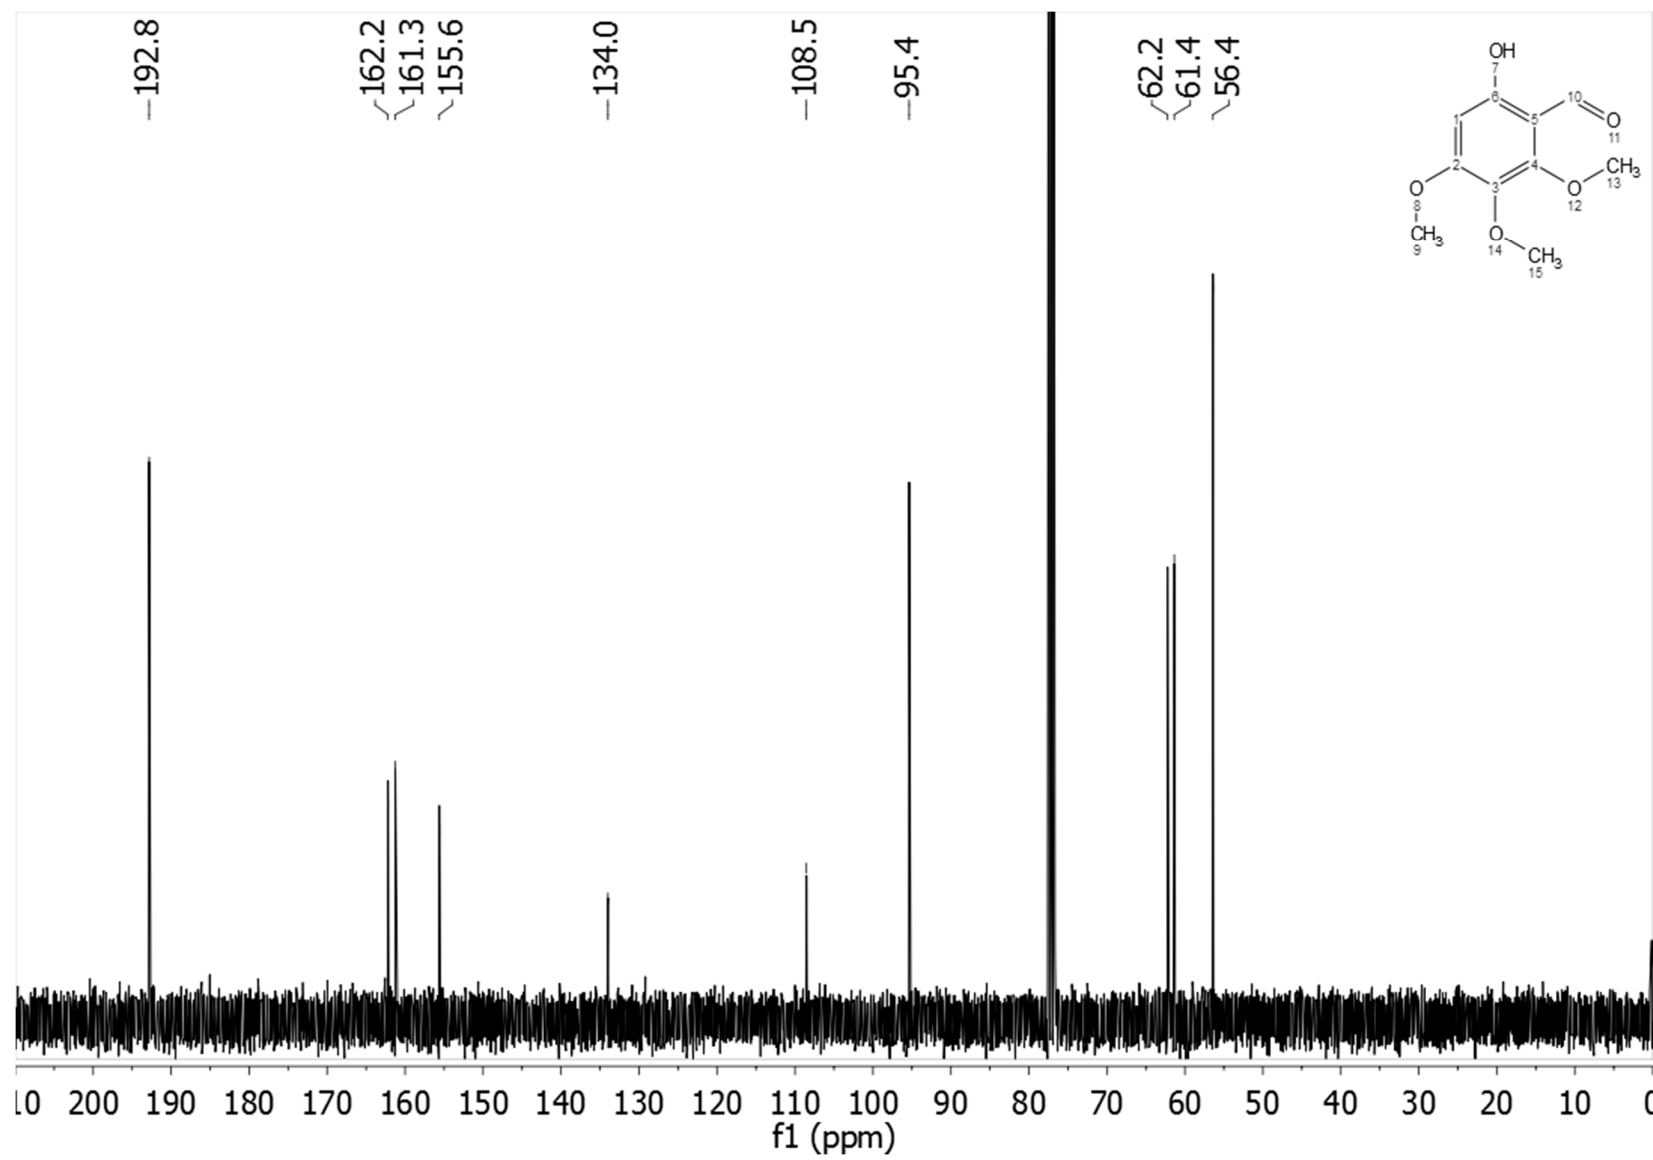

**Figure S16.** <sup>13</sup>C-NMR (100 MHz, CDCl<sub>3</sub>): **12**.

## ➤ Entry 7: Reaction with anisole:

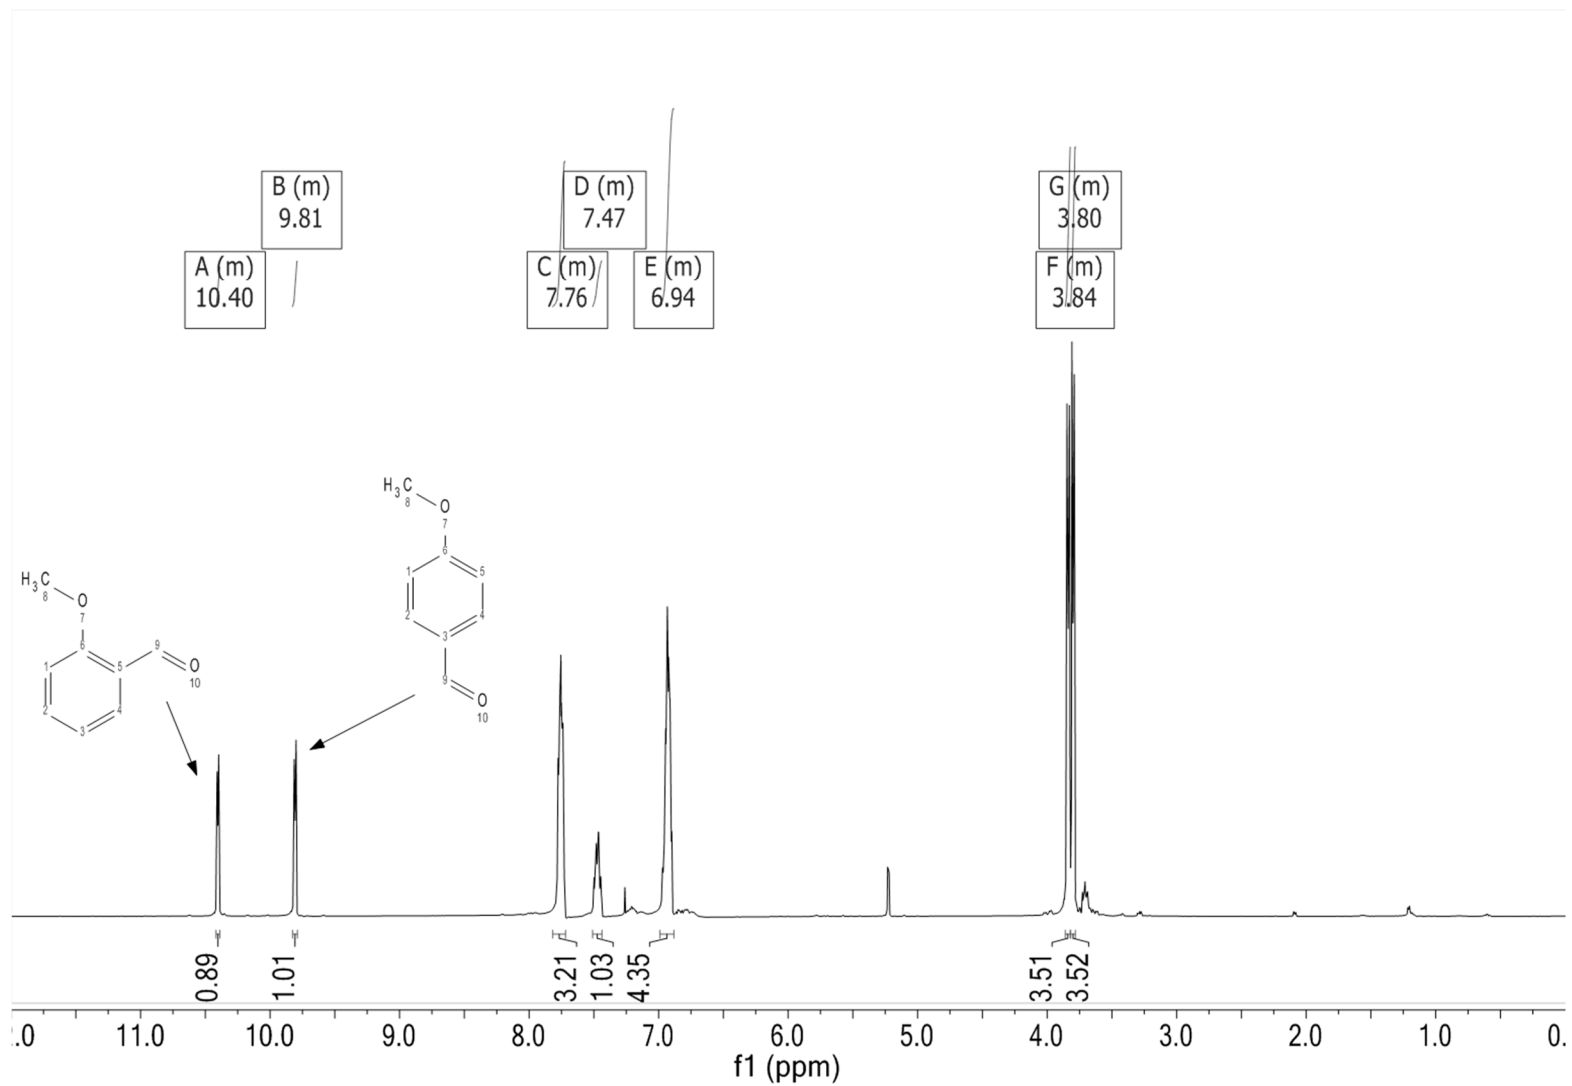Figure S17.  $^1\text{H}$  NMR (400 MHz,  $\text{CDCl}_3$ ): **13** and **14**.

➤ Entry 8: Reaction with 1,3-dimethoxybenzene:

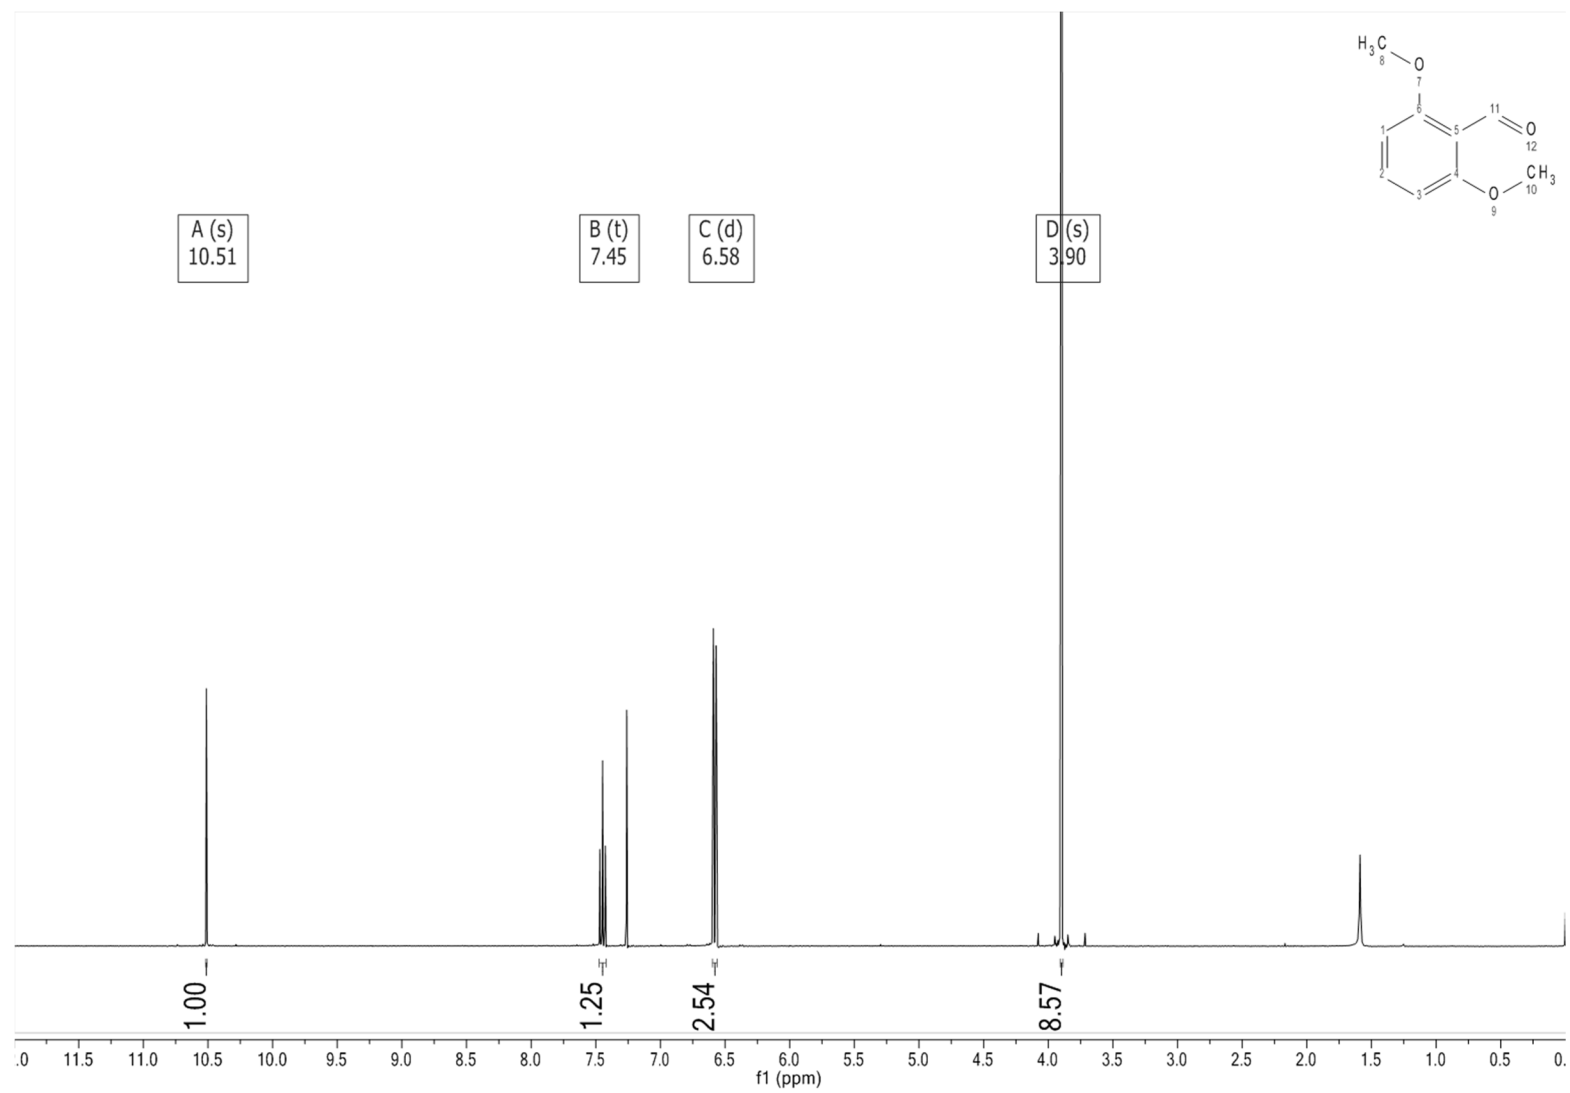

Figure S18.  $^1\text{H}$  NMR (400 MHz,  $\text{CDCl}_3$ ): **15**.

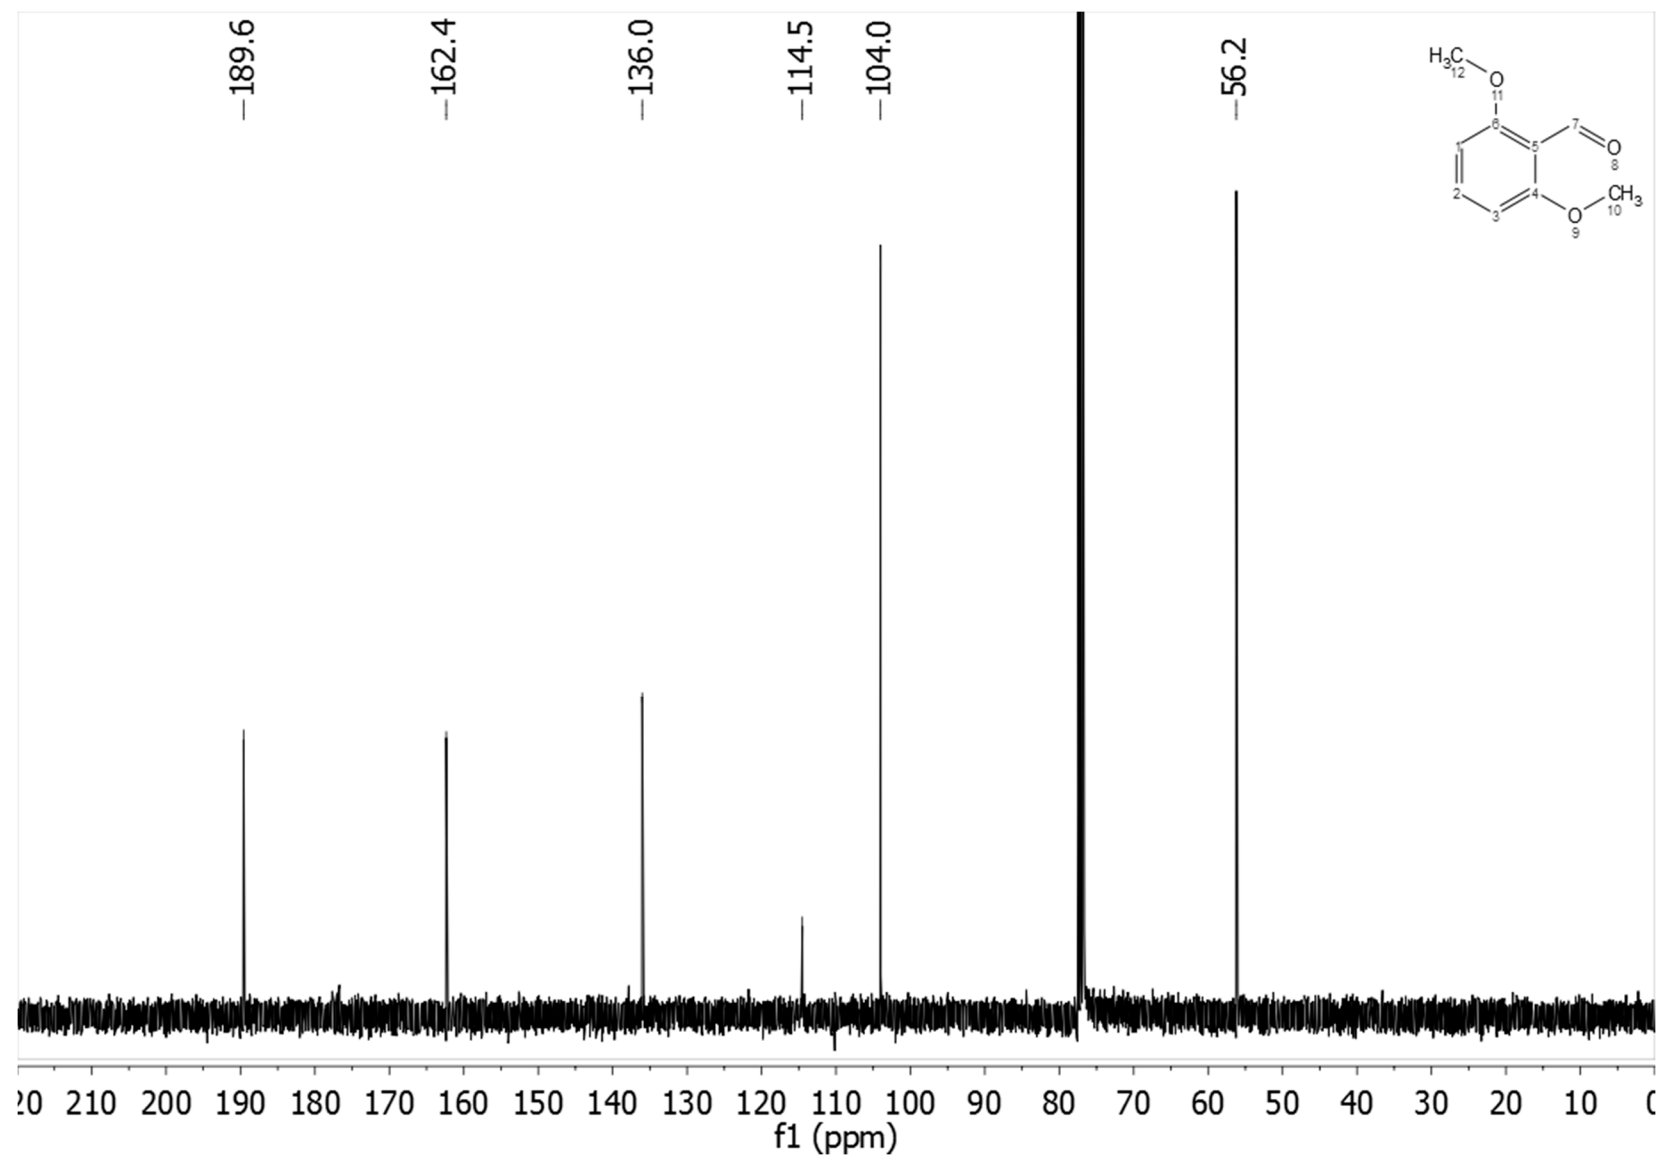

**Figure S19.**  $^{13}\text{C}$ -NMR (100 MHz,  $\text{CDCl}_3$ ): **15**.

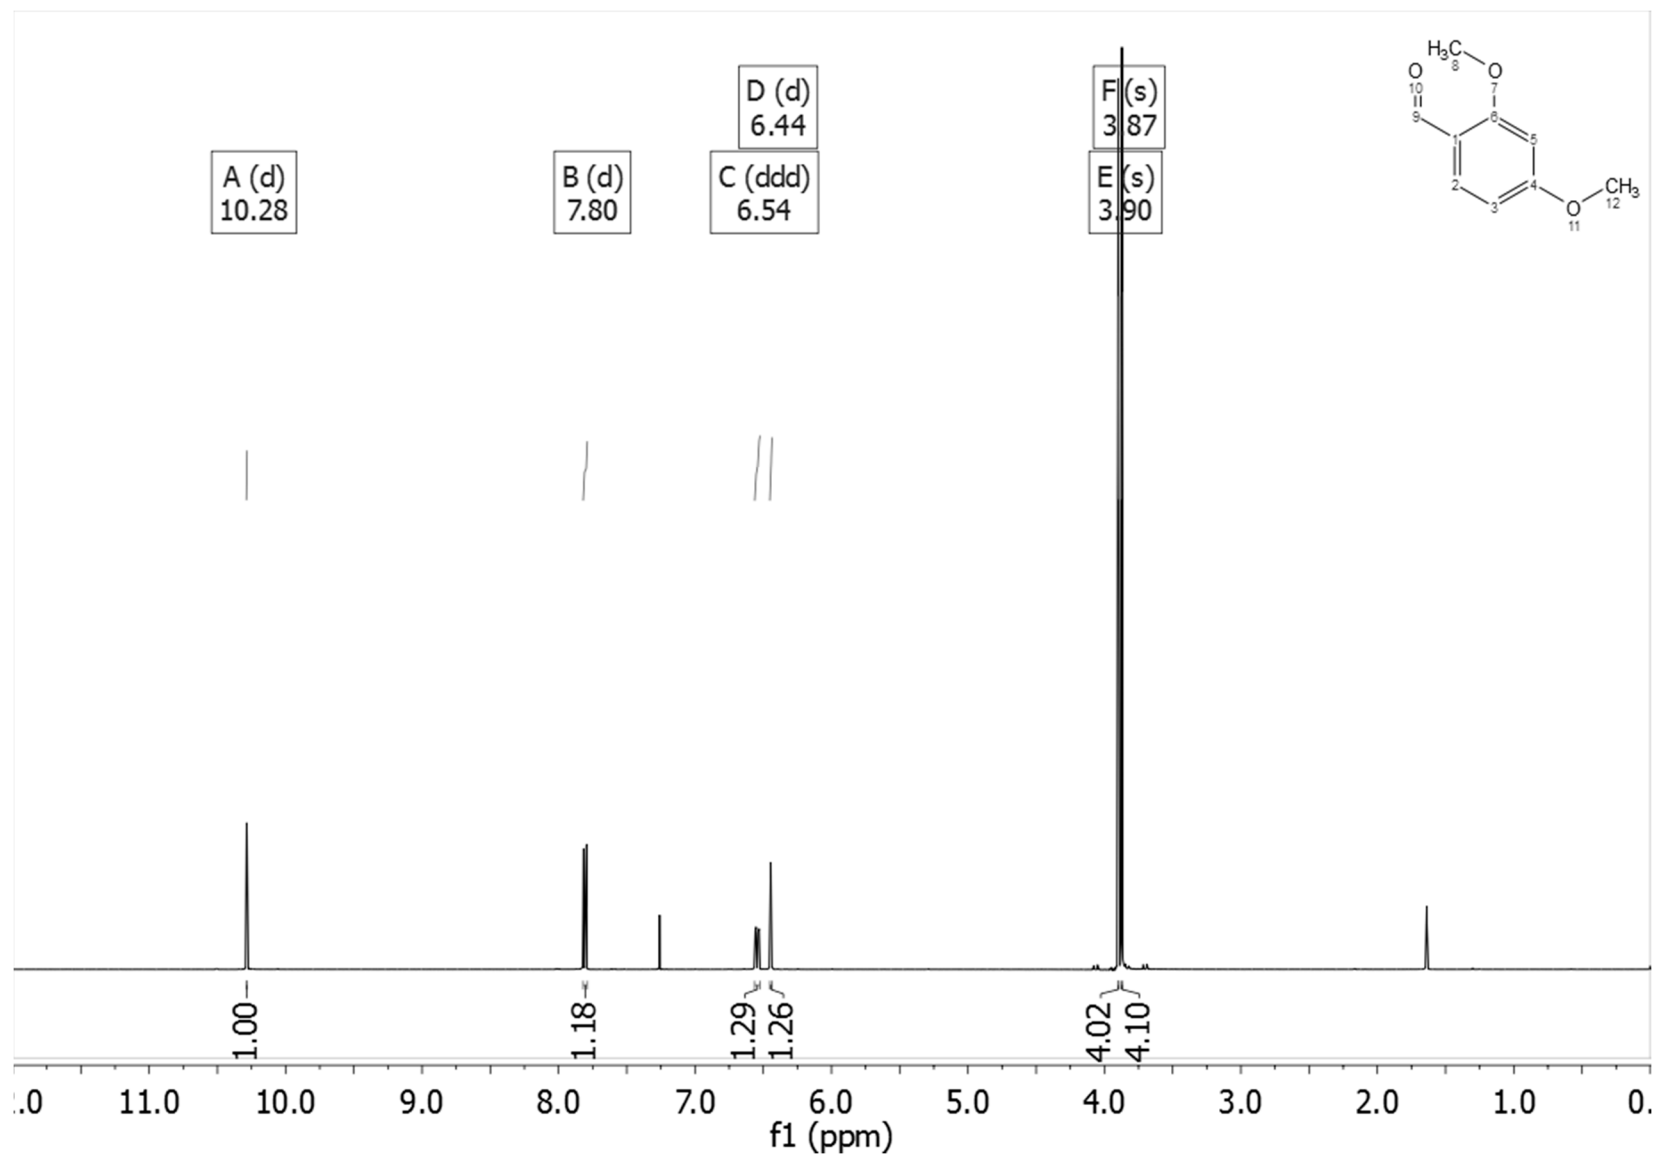

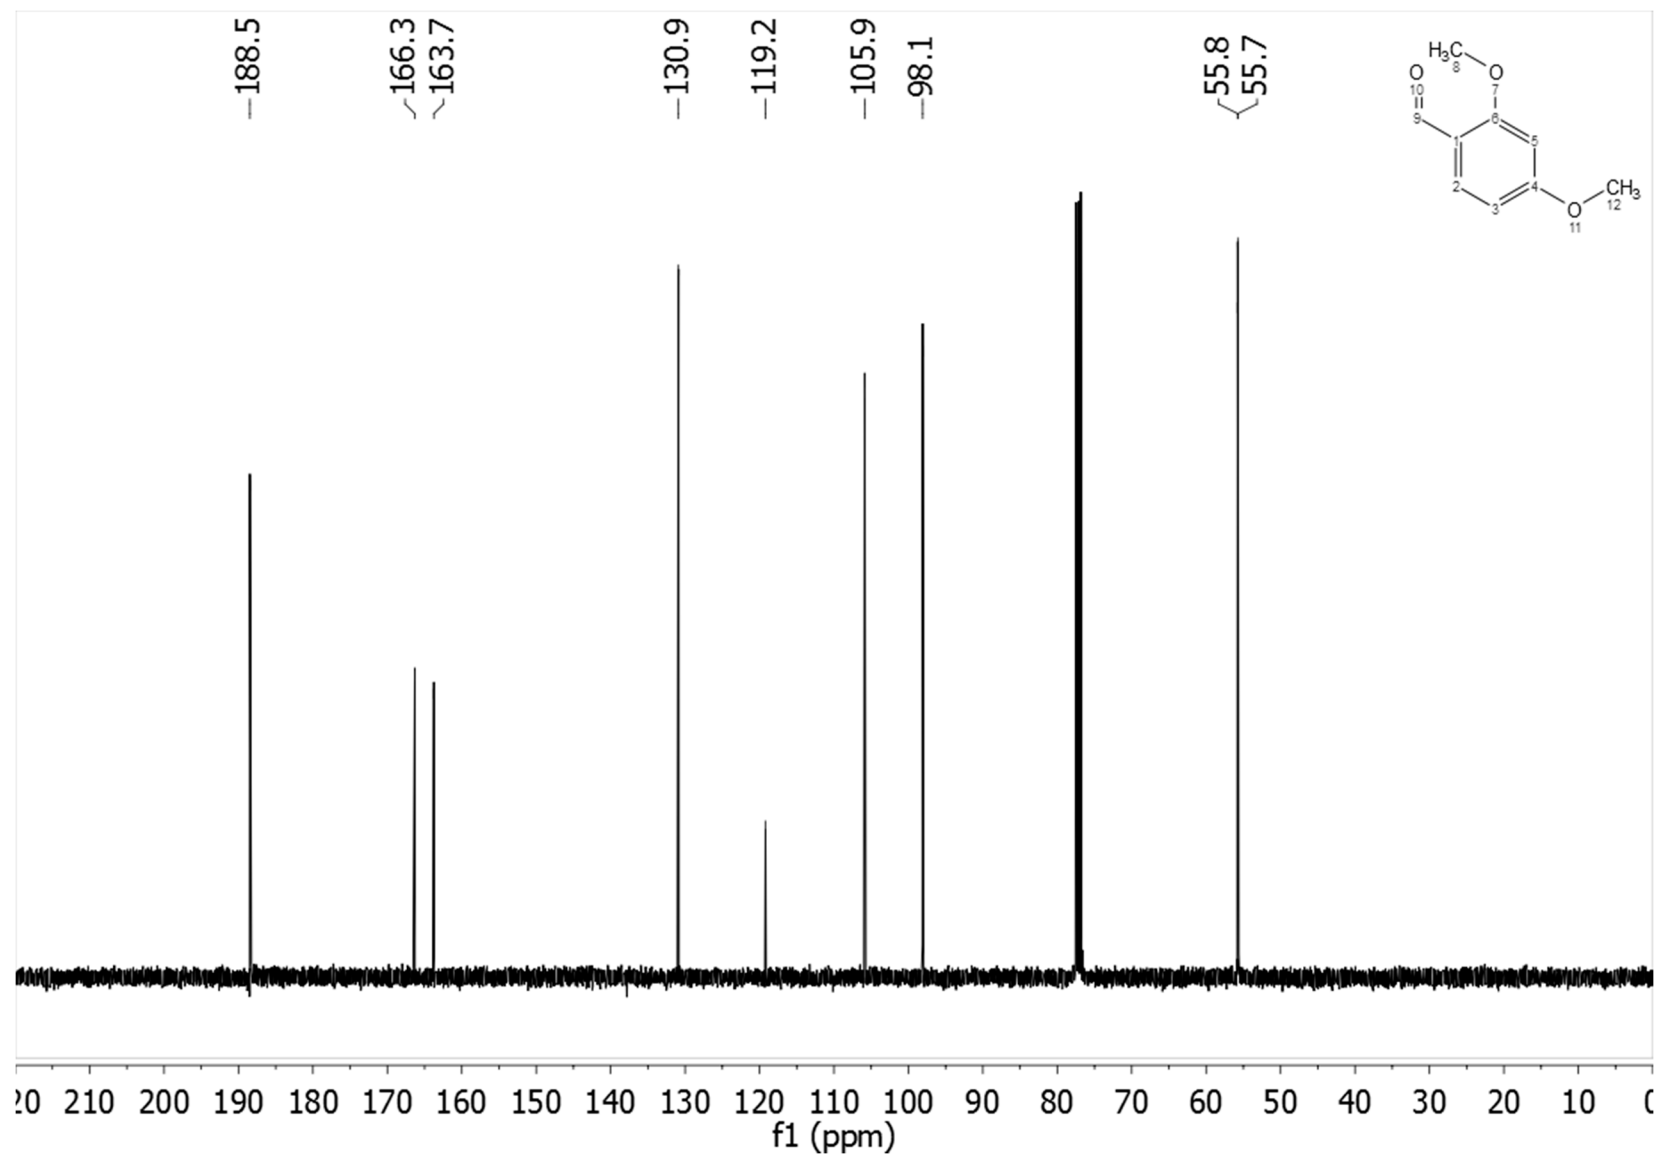

**Figure S21.** <sup>13</sup>C-NMR (100 MHz, CDCl<sub>3</sub>): 16.

➤ Entry 9: Reaction with 1,3,5-trimethoxybenzene:

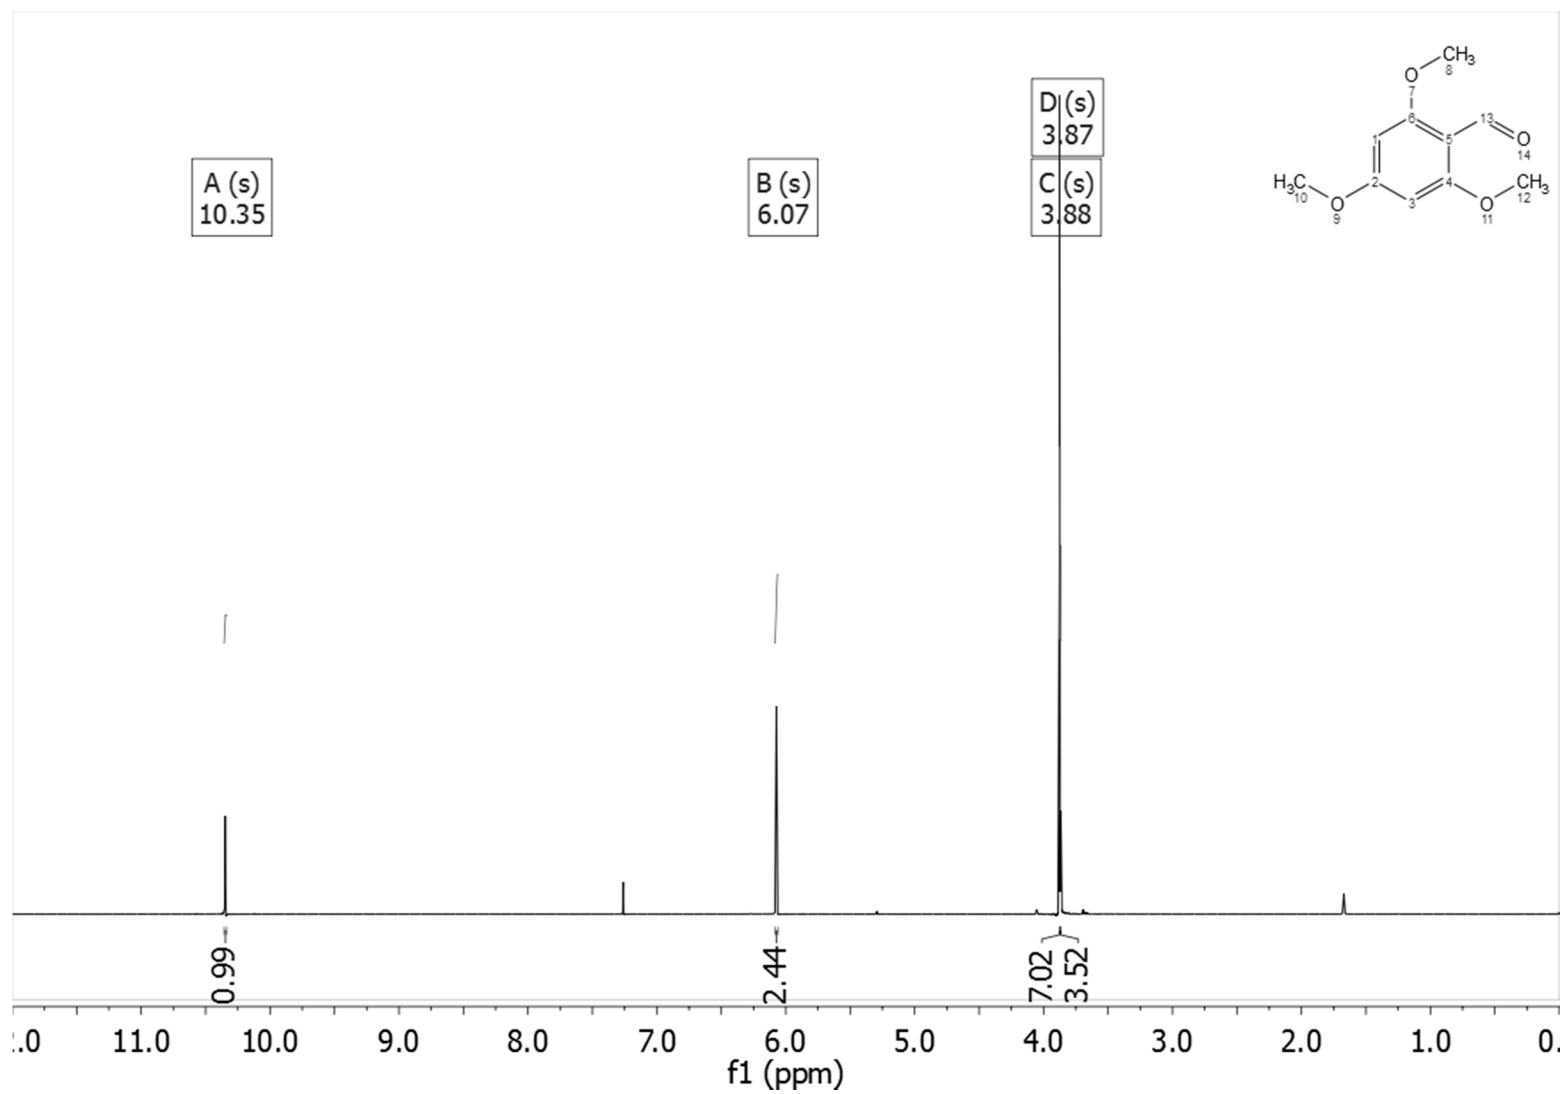

Figure S22.  $^1\text{H}$  NMR (400 MHz,  $\text{CDCl}_3$ ): 17.

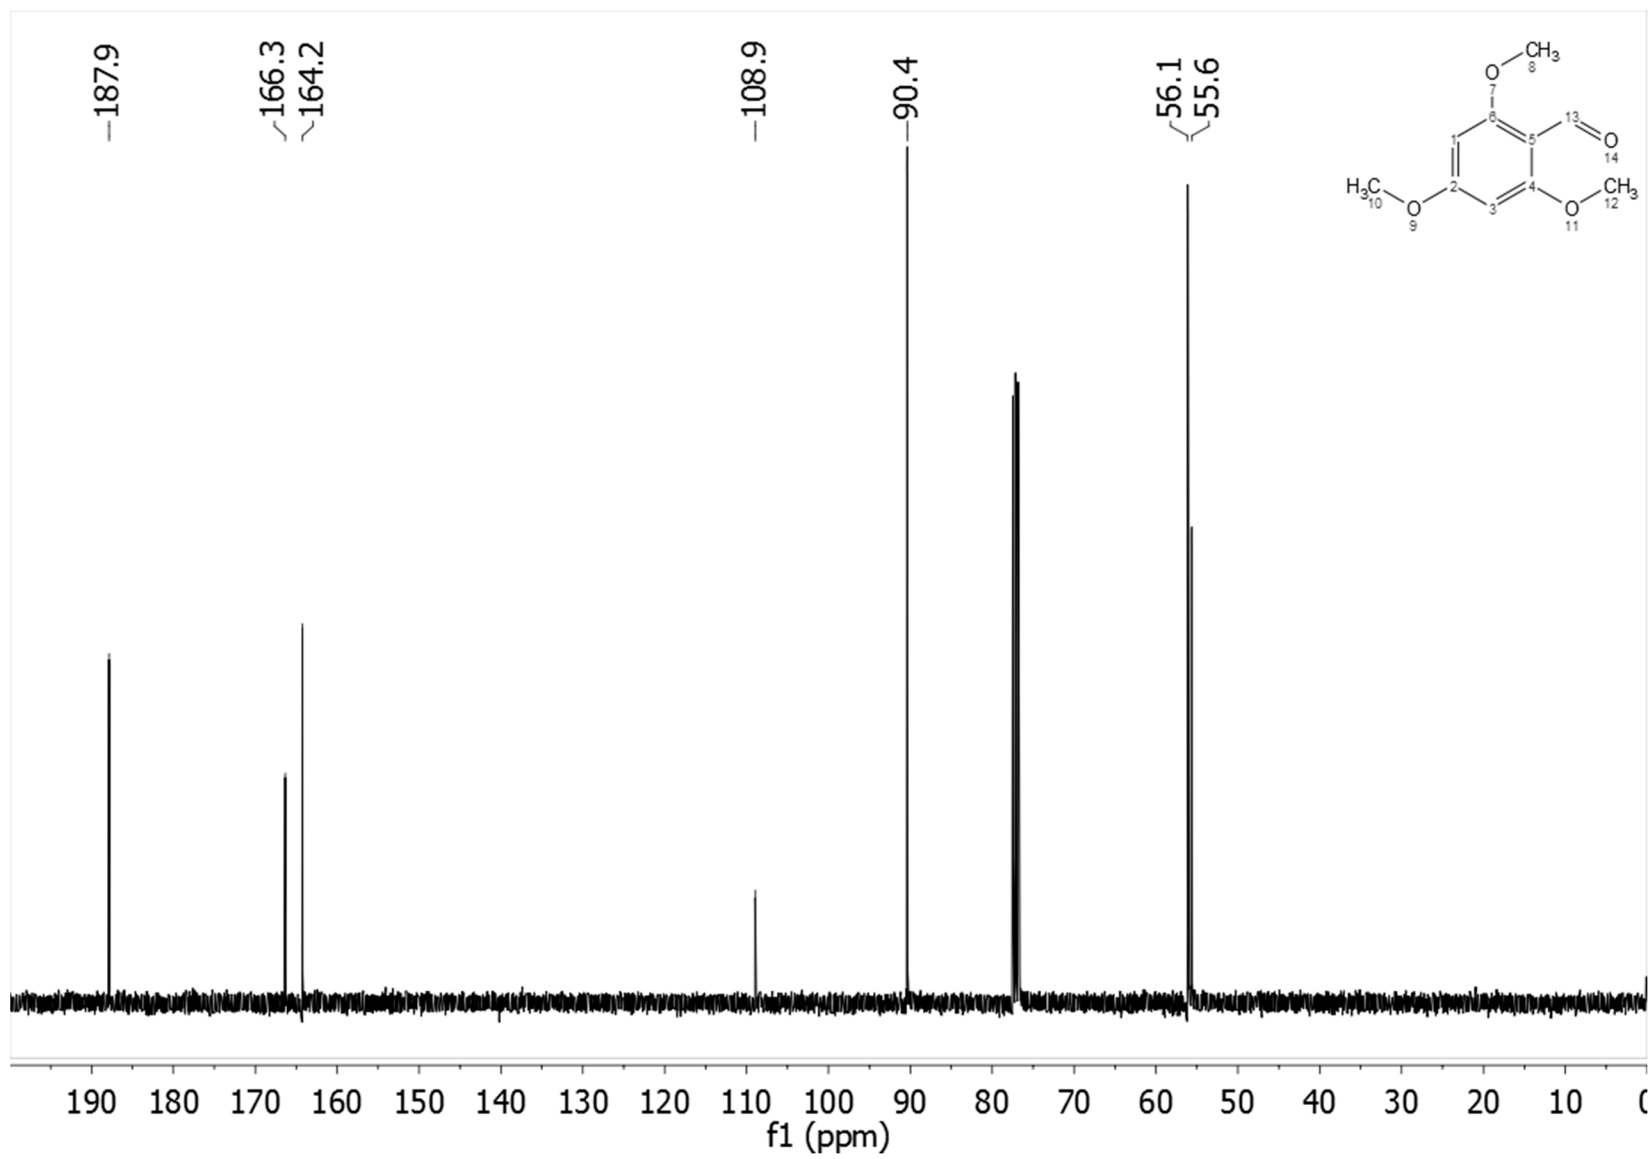

Figure S23. <sup>13</sup>C-NMR (100 MHz, CDCl<sub>3</sub>): 17.

## ➤ Entry 10: Reaction with 3,5-dimethylanisole

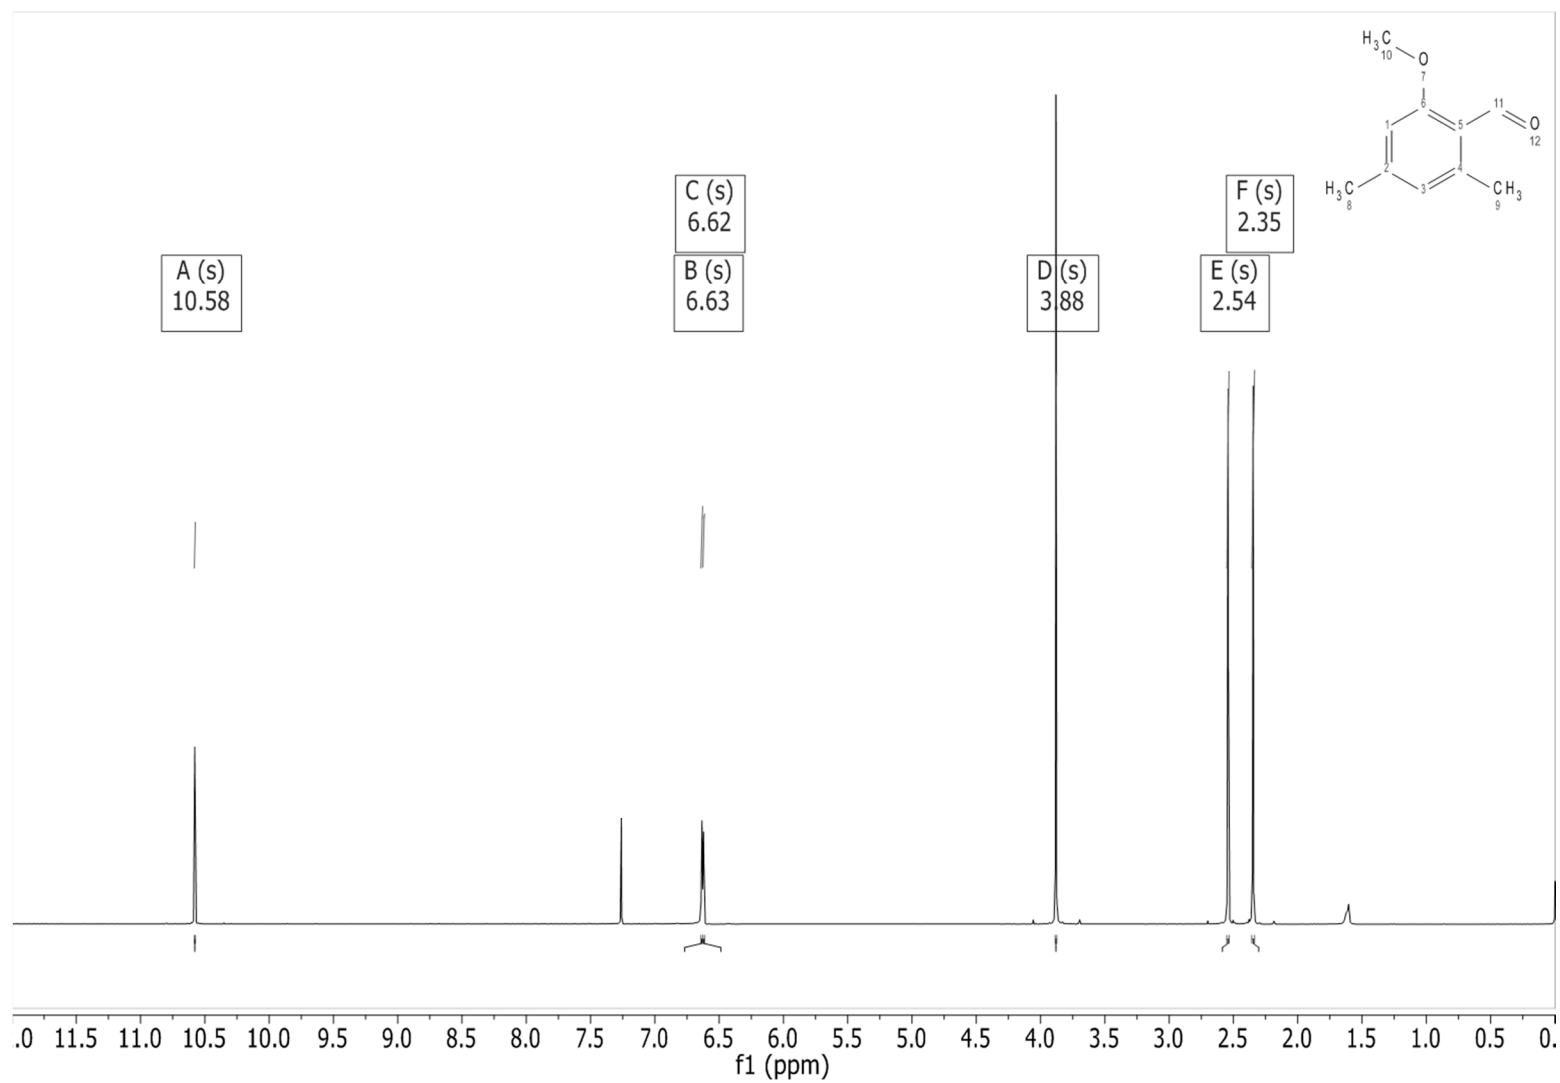**Figure S24.**  $^1\text{H}$ -NMR (400 MHz,  $\text{CDCl}_3$ ): **18**.

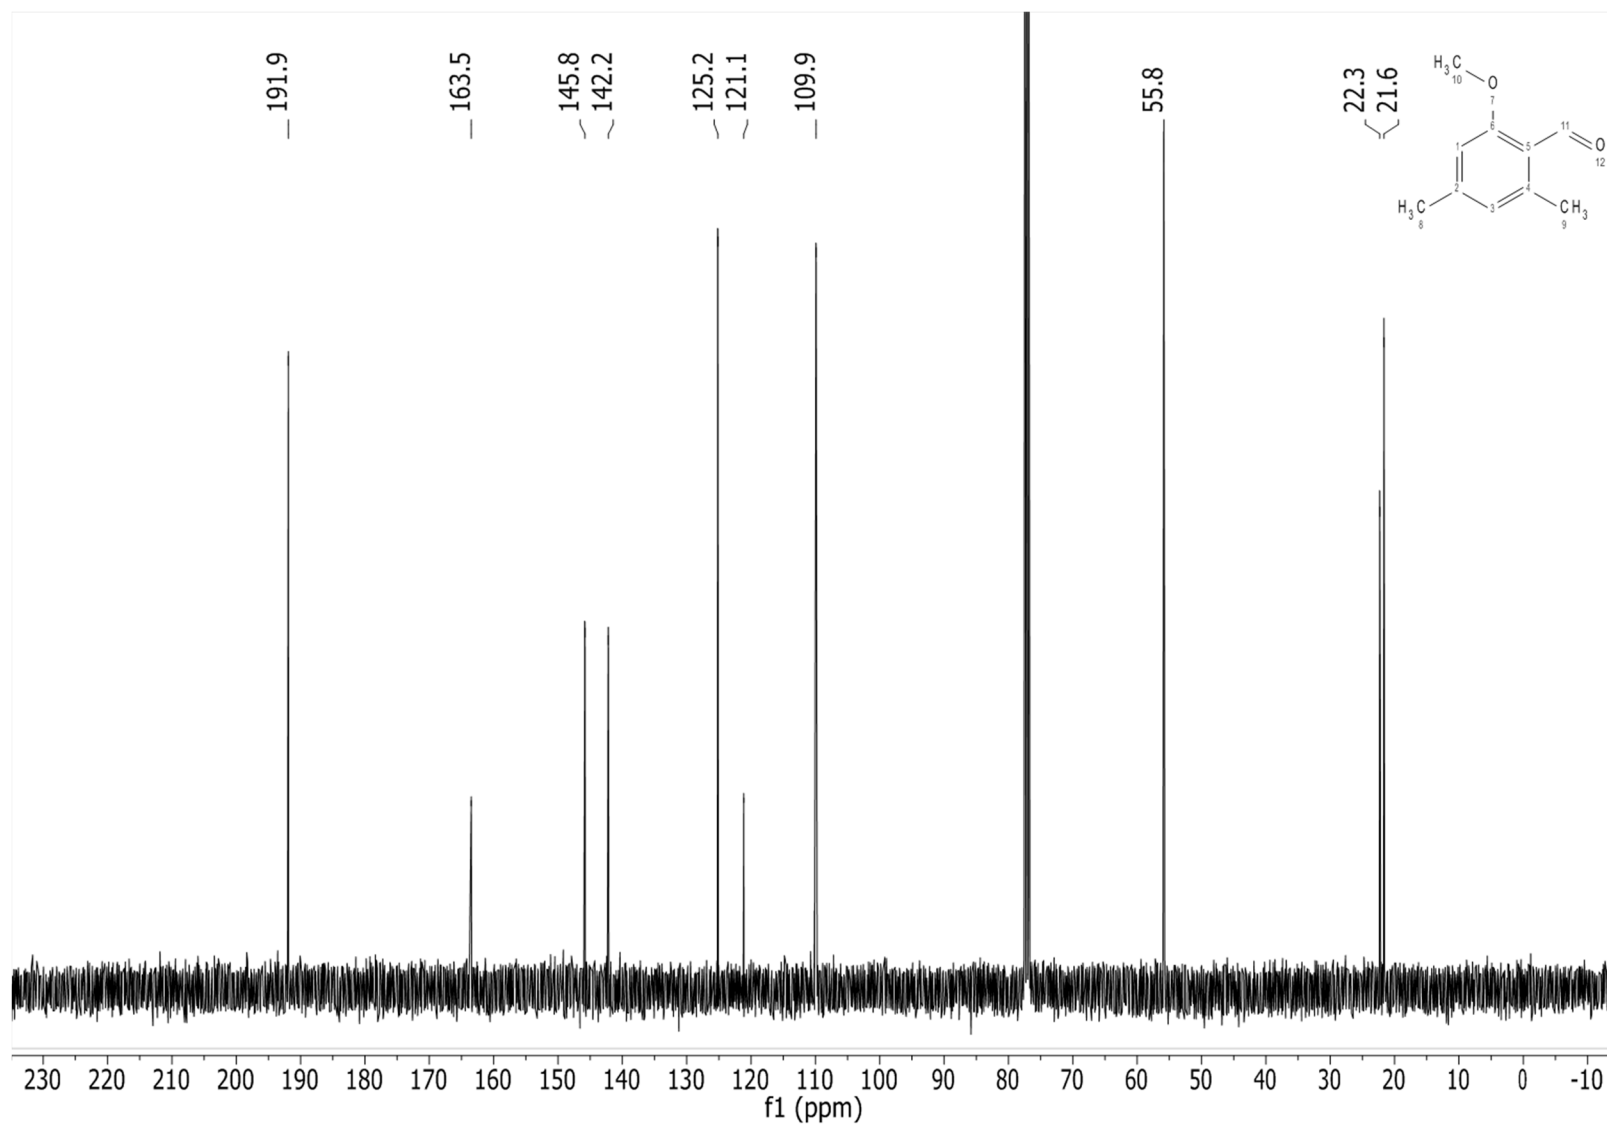

**Figure S25.** <sup>13</sup>C-NMR (100 MHz, CDCl<sub>3</sub>): **18**.

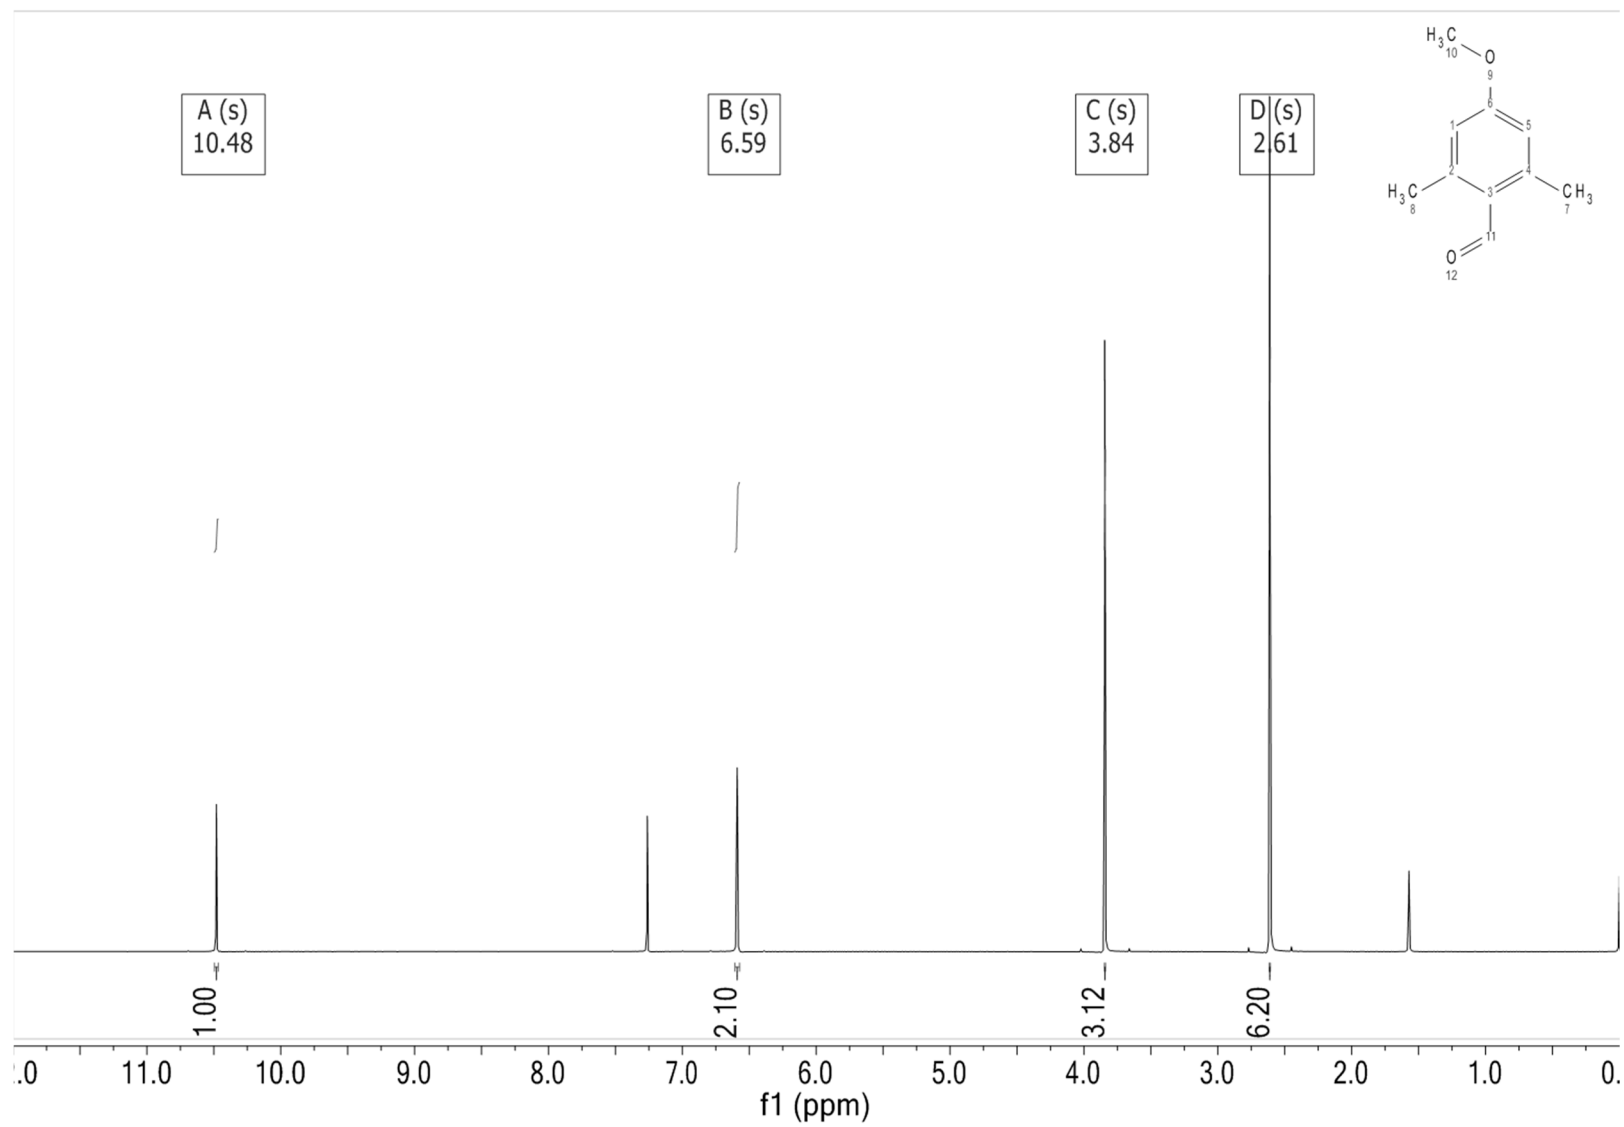

**Figure S26.**  $^1\text{H}$ -NMR (400 MHz,  $\text{CDCl}_3$ ): **19**.

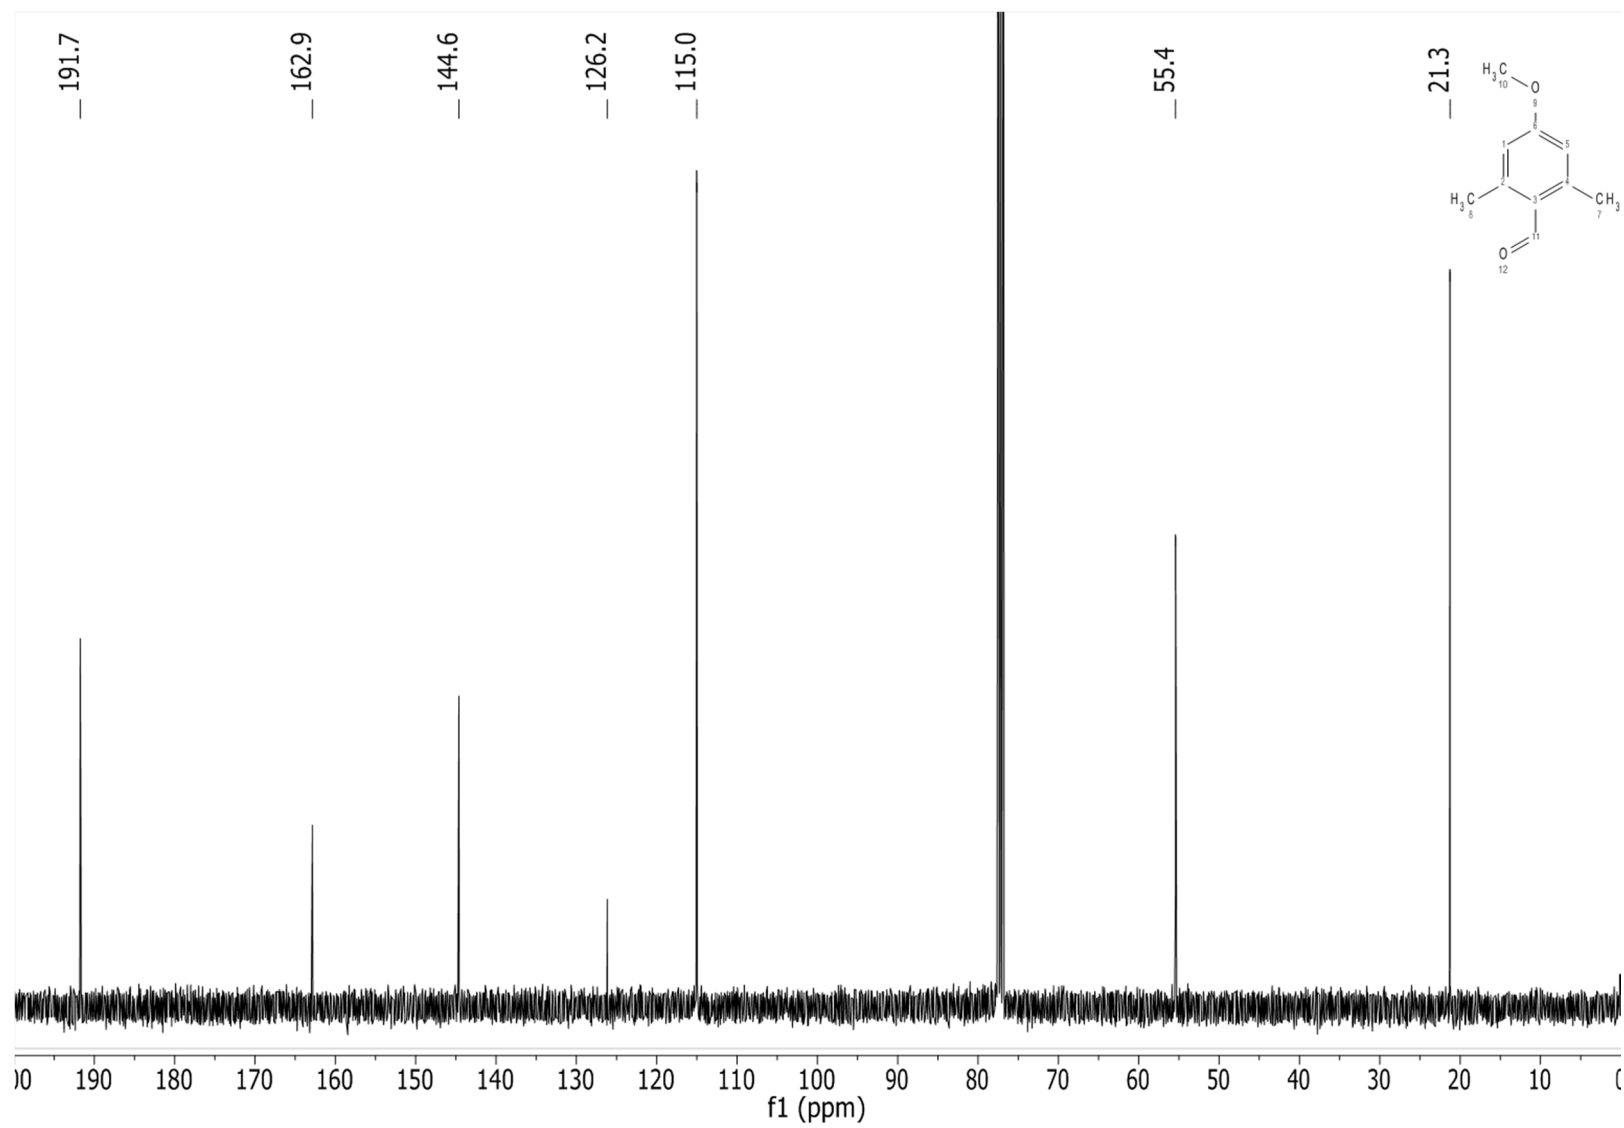

**Figure S27.**  $^{13}\text{C}$ -NMR (101 MHz,  $\text{CDCl}_3$ ): **19**.

➤ Entry 11: Reaction with o-xylene:

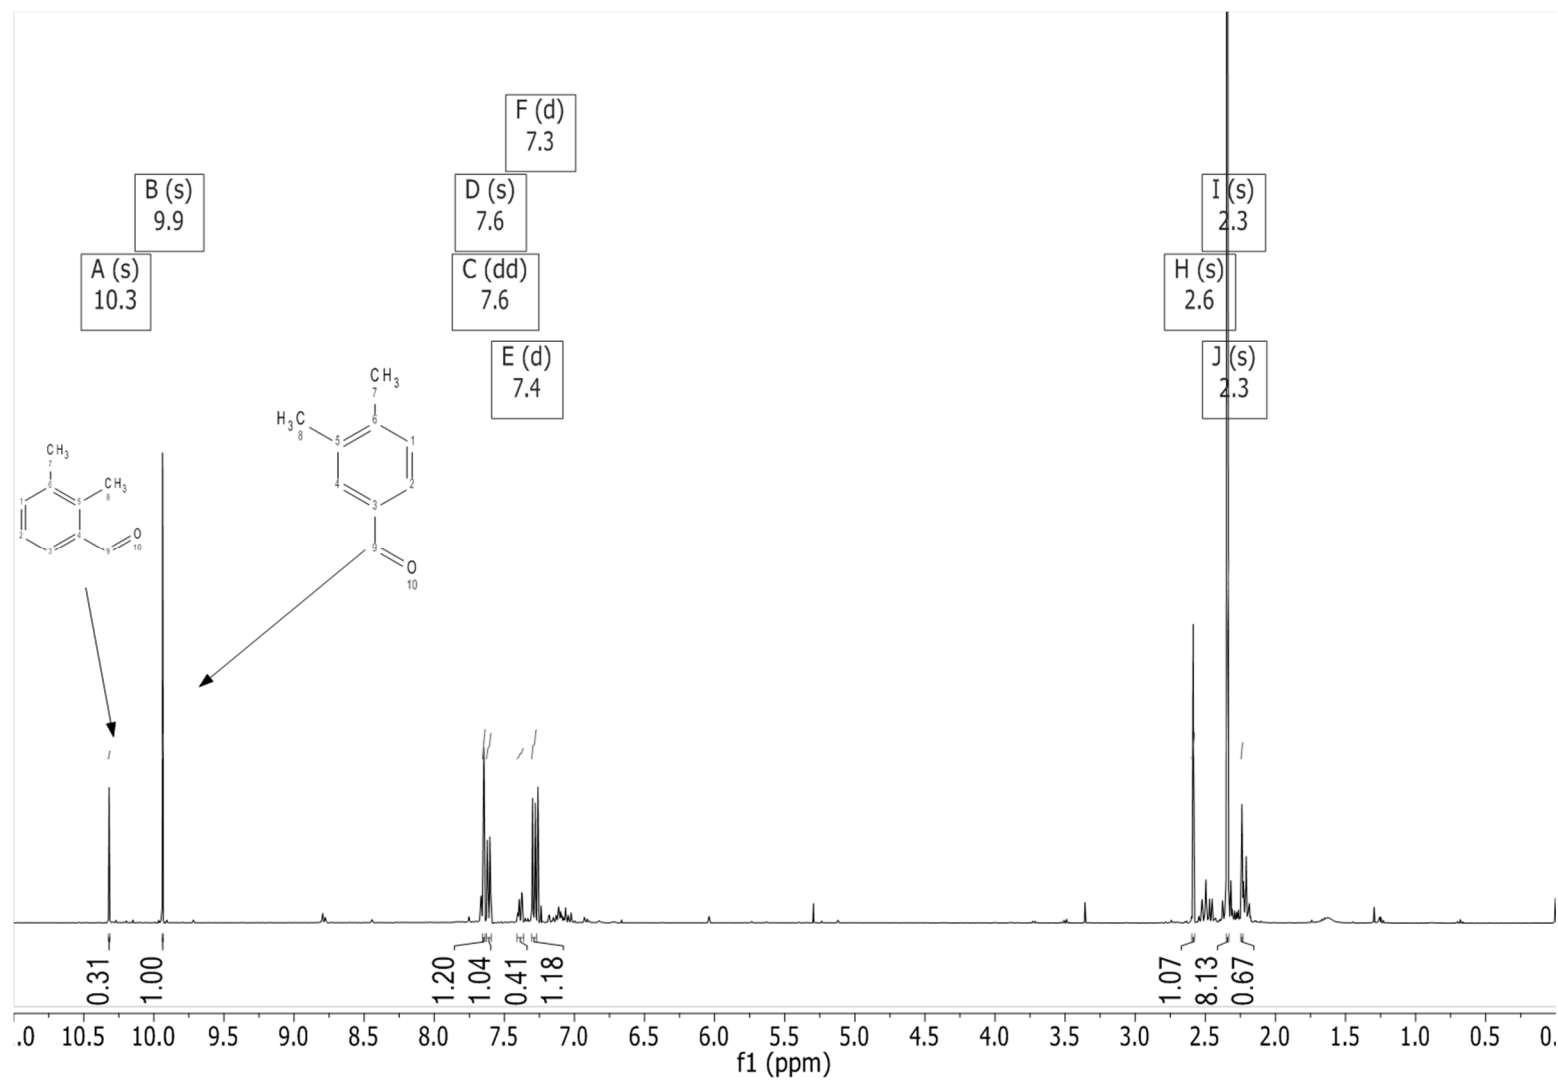

**Figure S28.**  $^1\text{H}$ -NMR (400 MHz,  $\text{CDCl}_3$ ): **20** and **21**.

➤ Entry 12: Reaction with *m*-xylene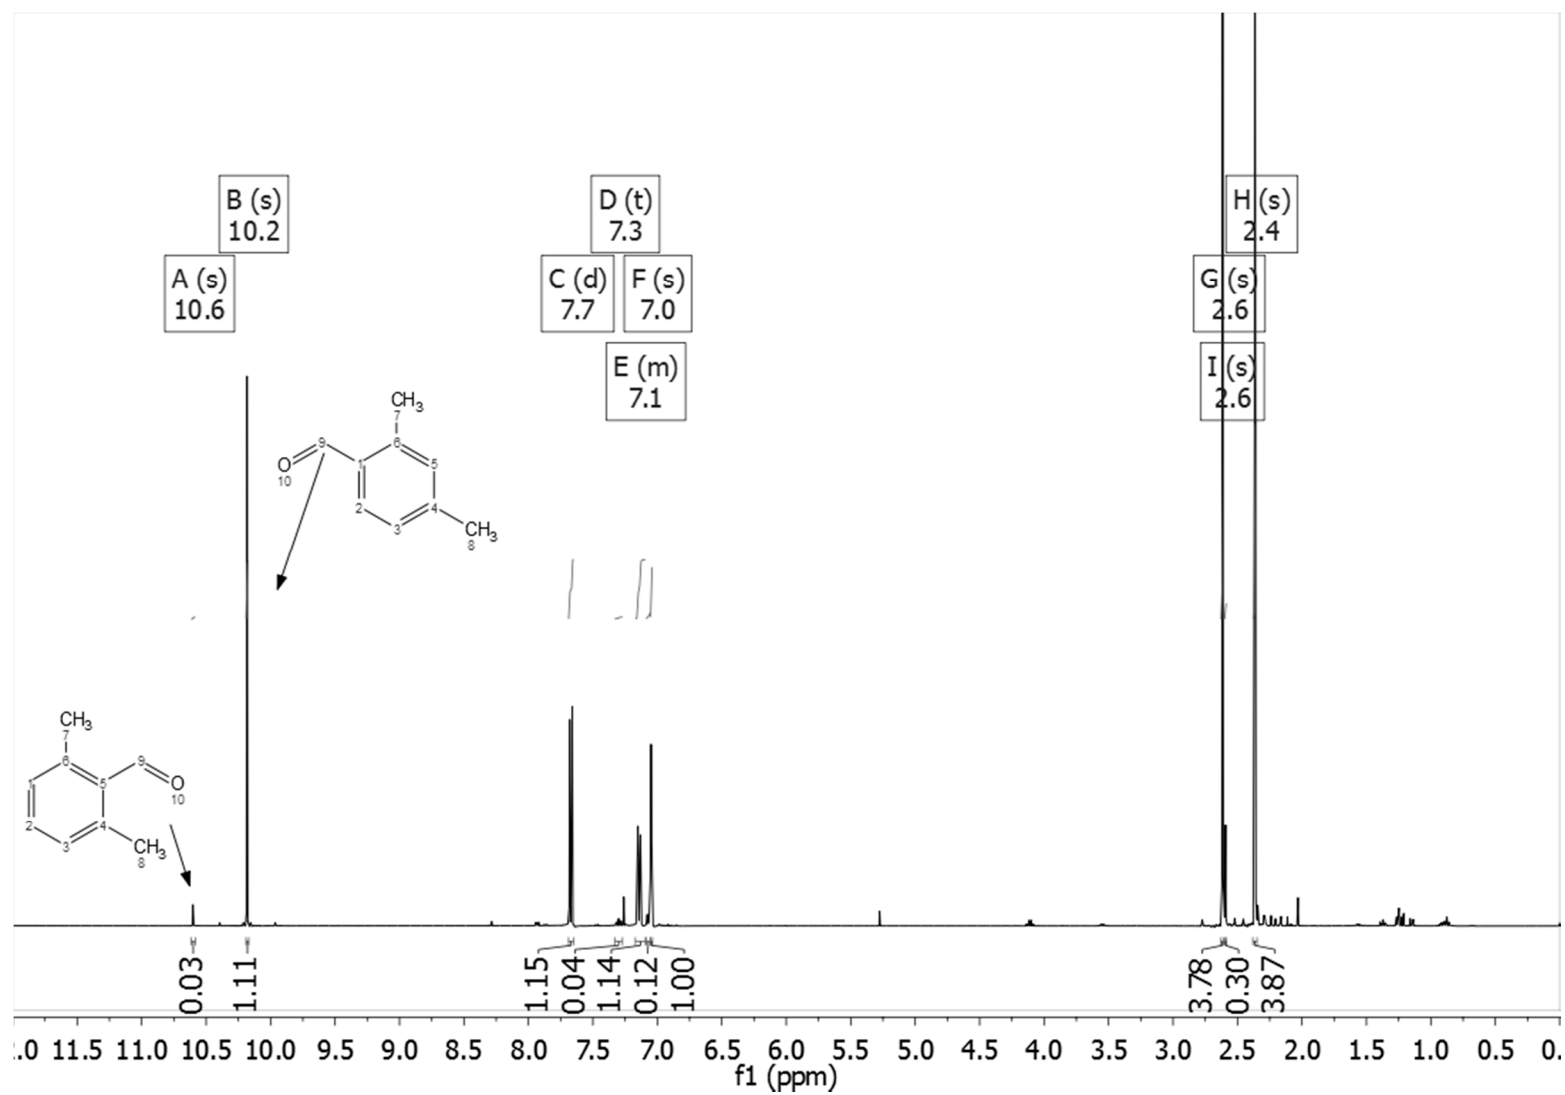Figure S29. <sup>1</sup>H-NMR (400 MHz, CDCl<sub>3</sub>): **22** and **23**.

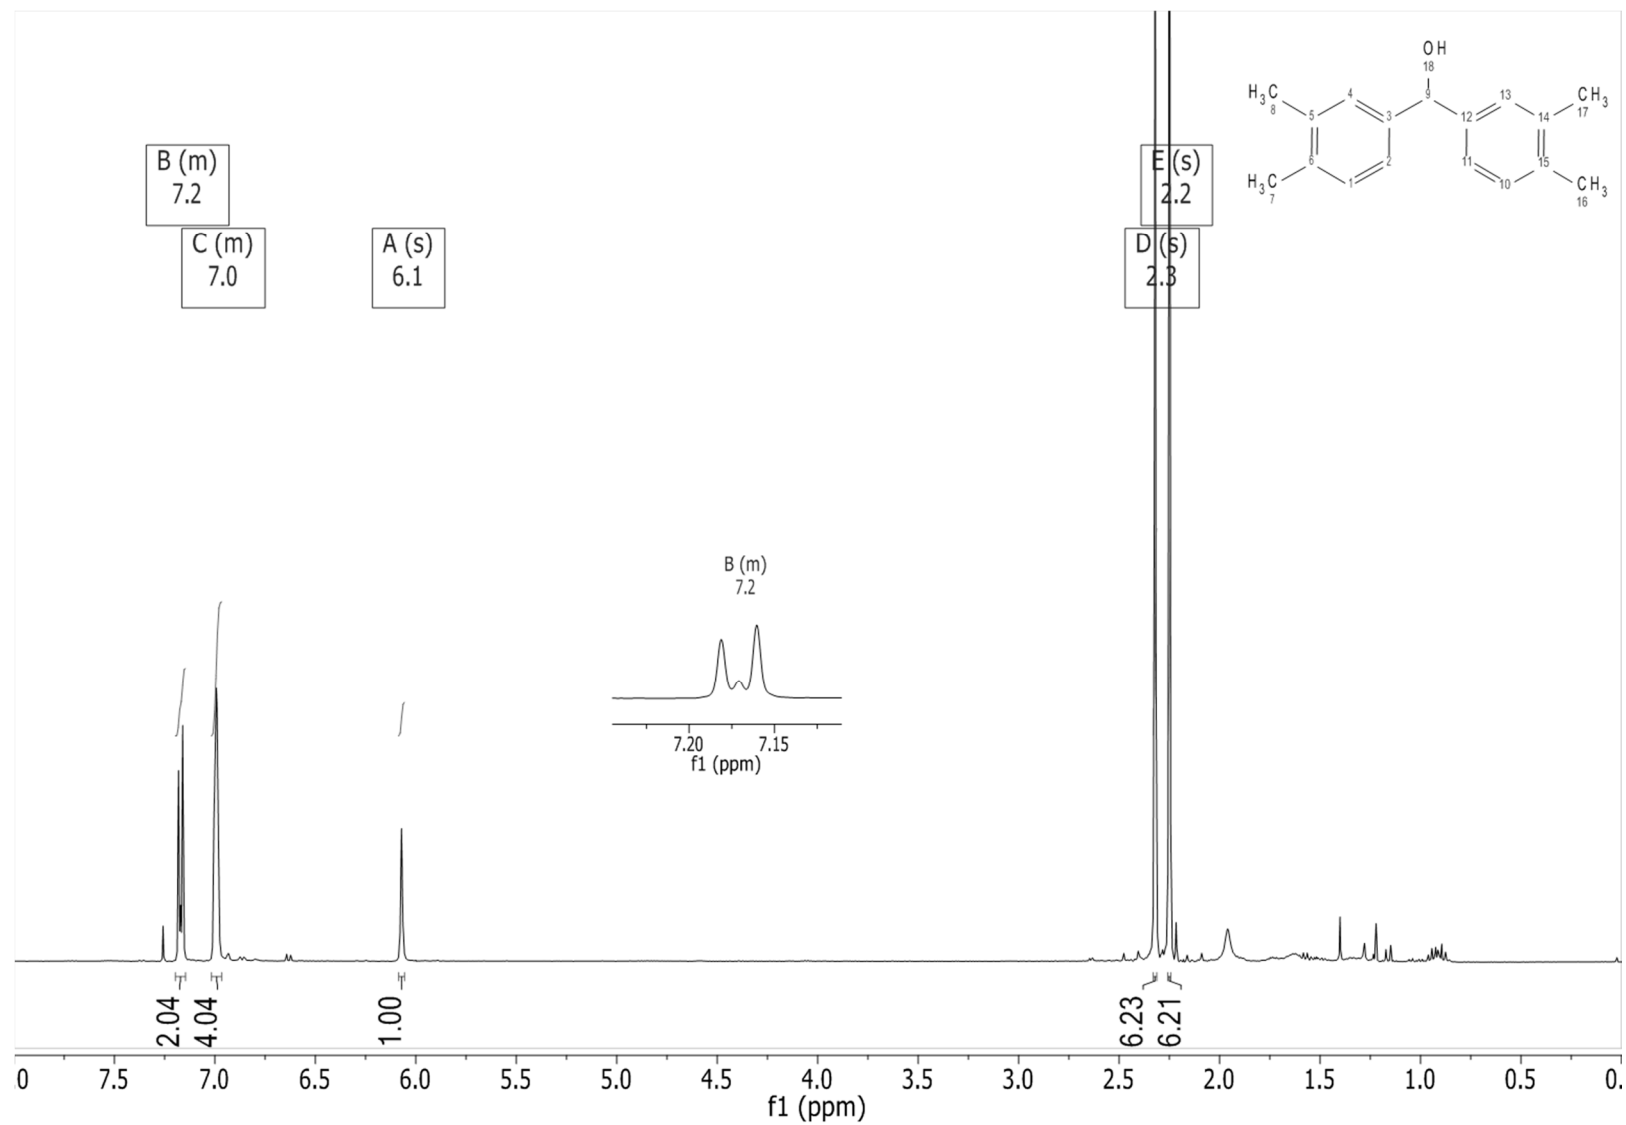

**Figure S30.** <sup>1</sup>H-NMR (400 MHz, CDCl<sub>3</sub>): **24**.

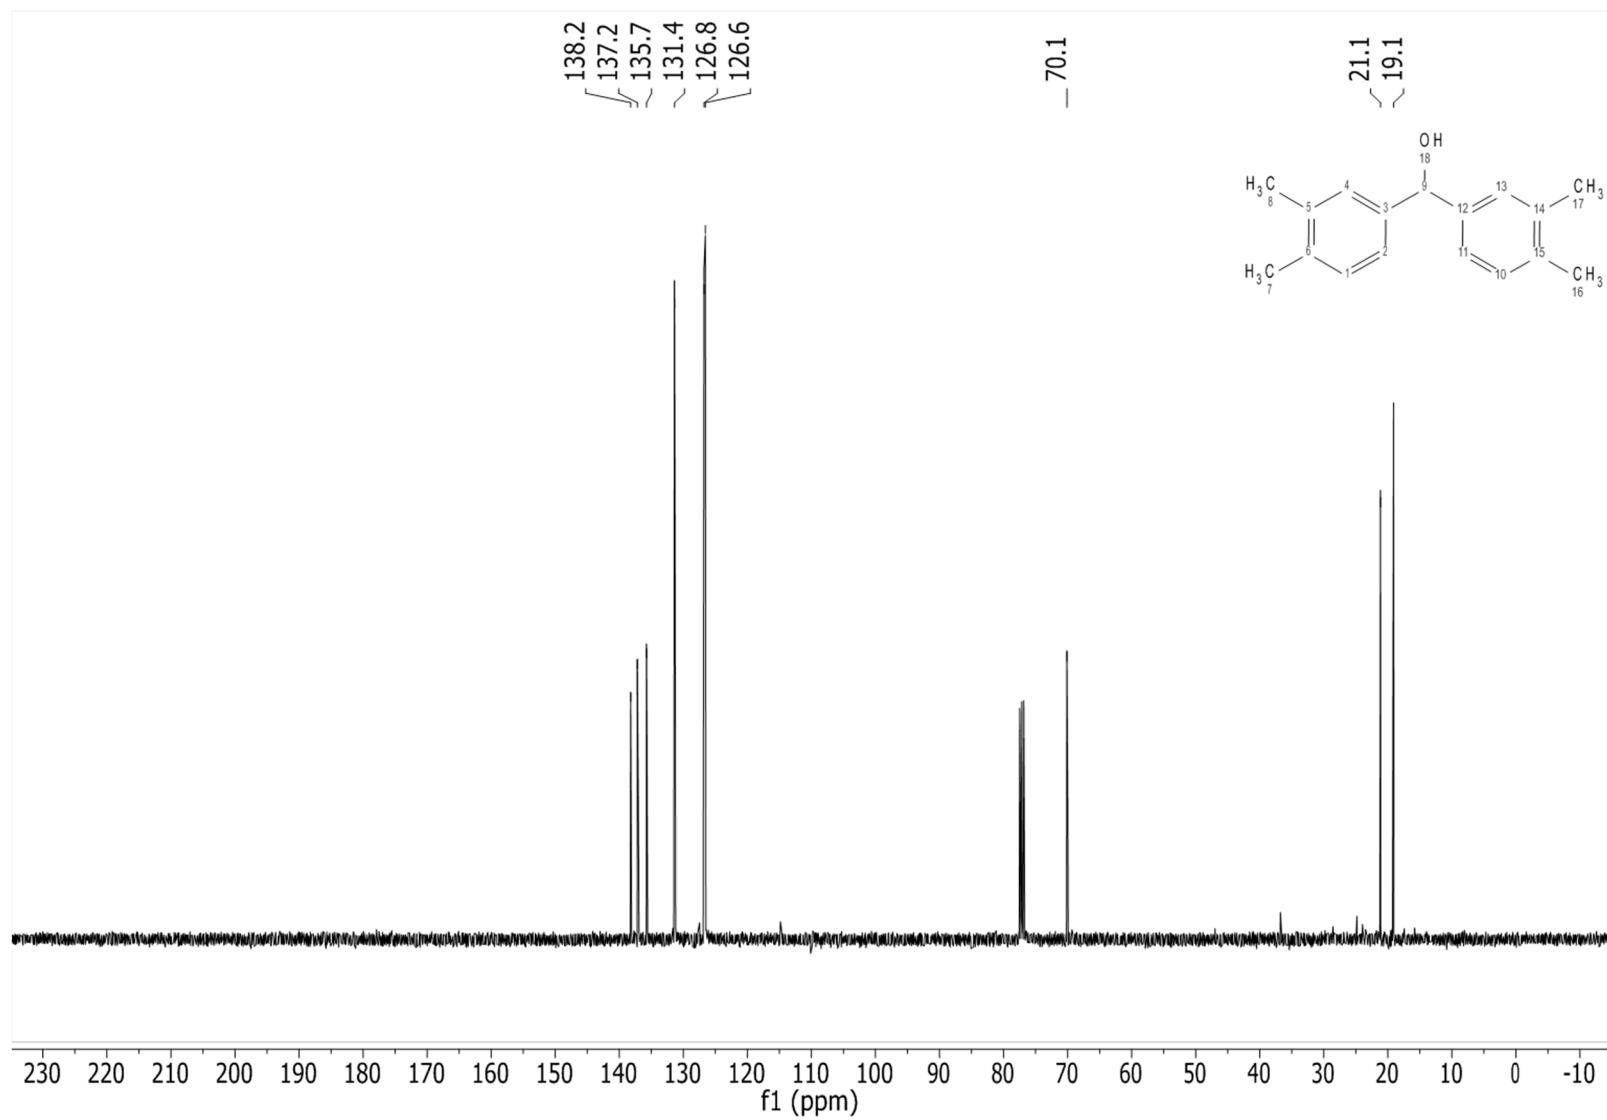

**Figure S31.** <sup>13</sup>C-NMR (101 MHz, CDCl<sub>3</sub>): **24**.

➤ Entry 13: Reaction with *p*-xylene:

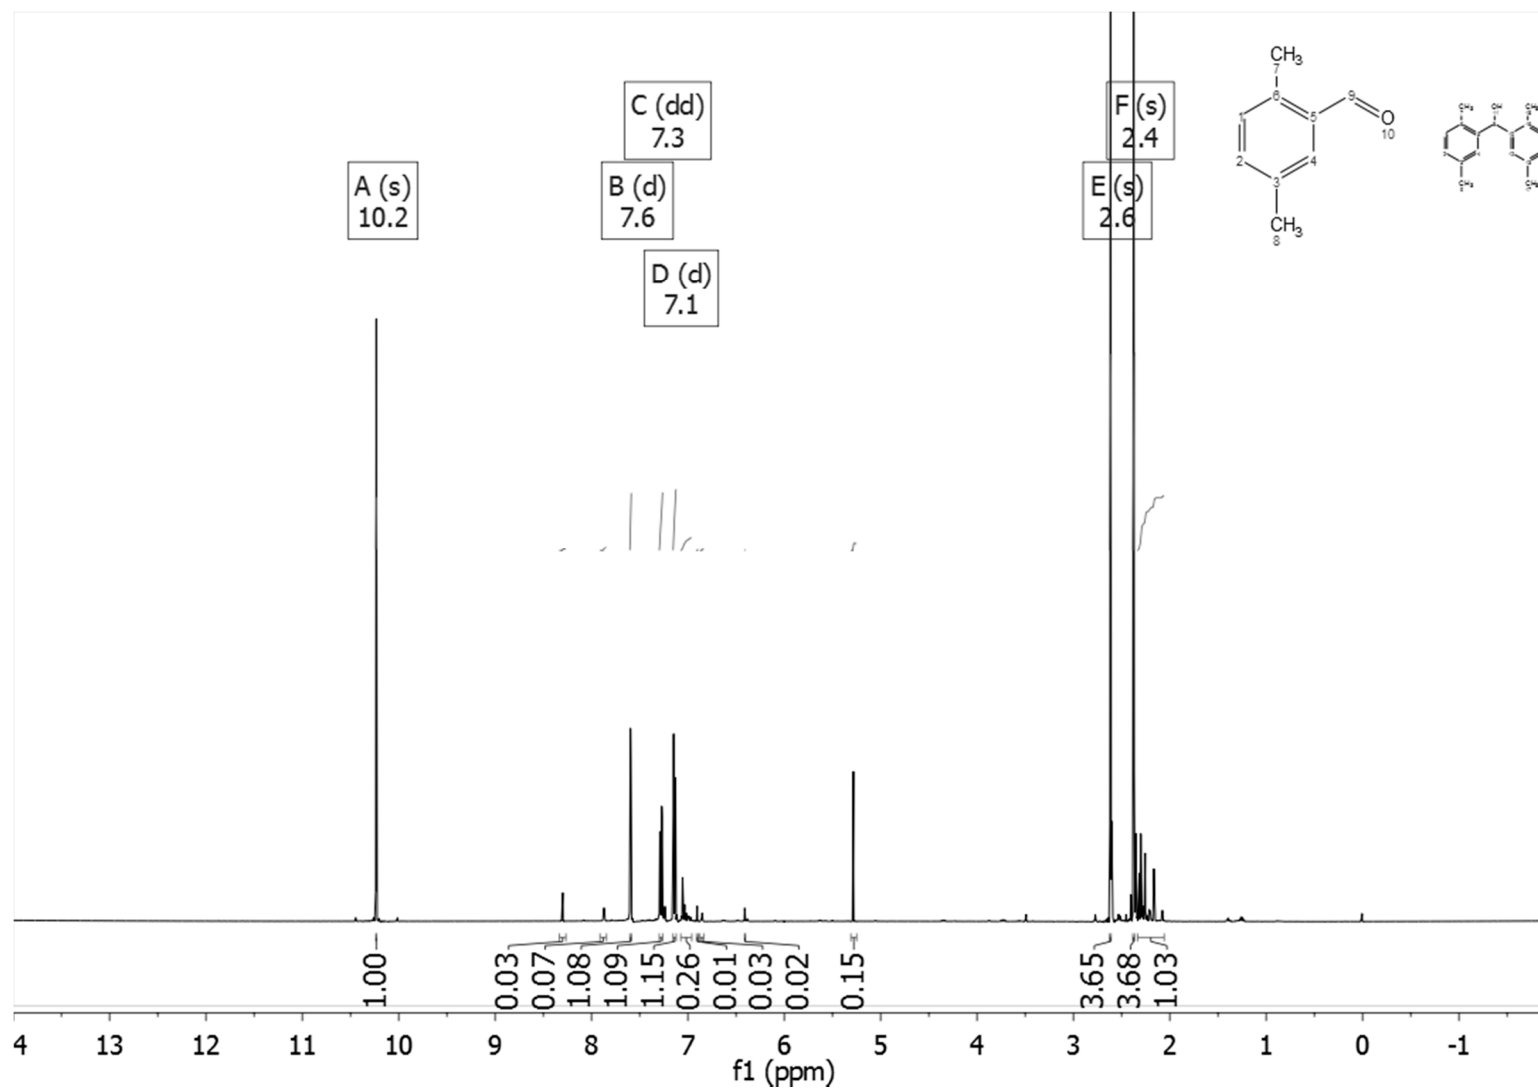

## ➤ Entry 14: Reaction with mesitylene:

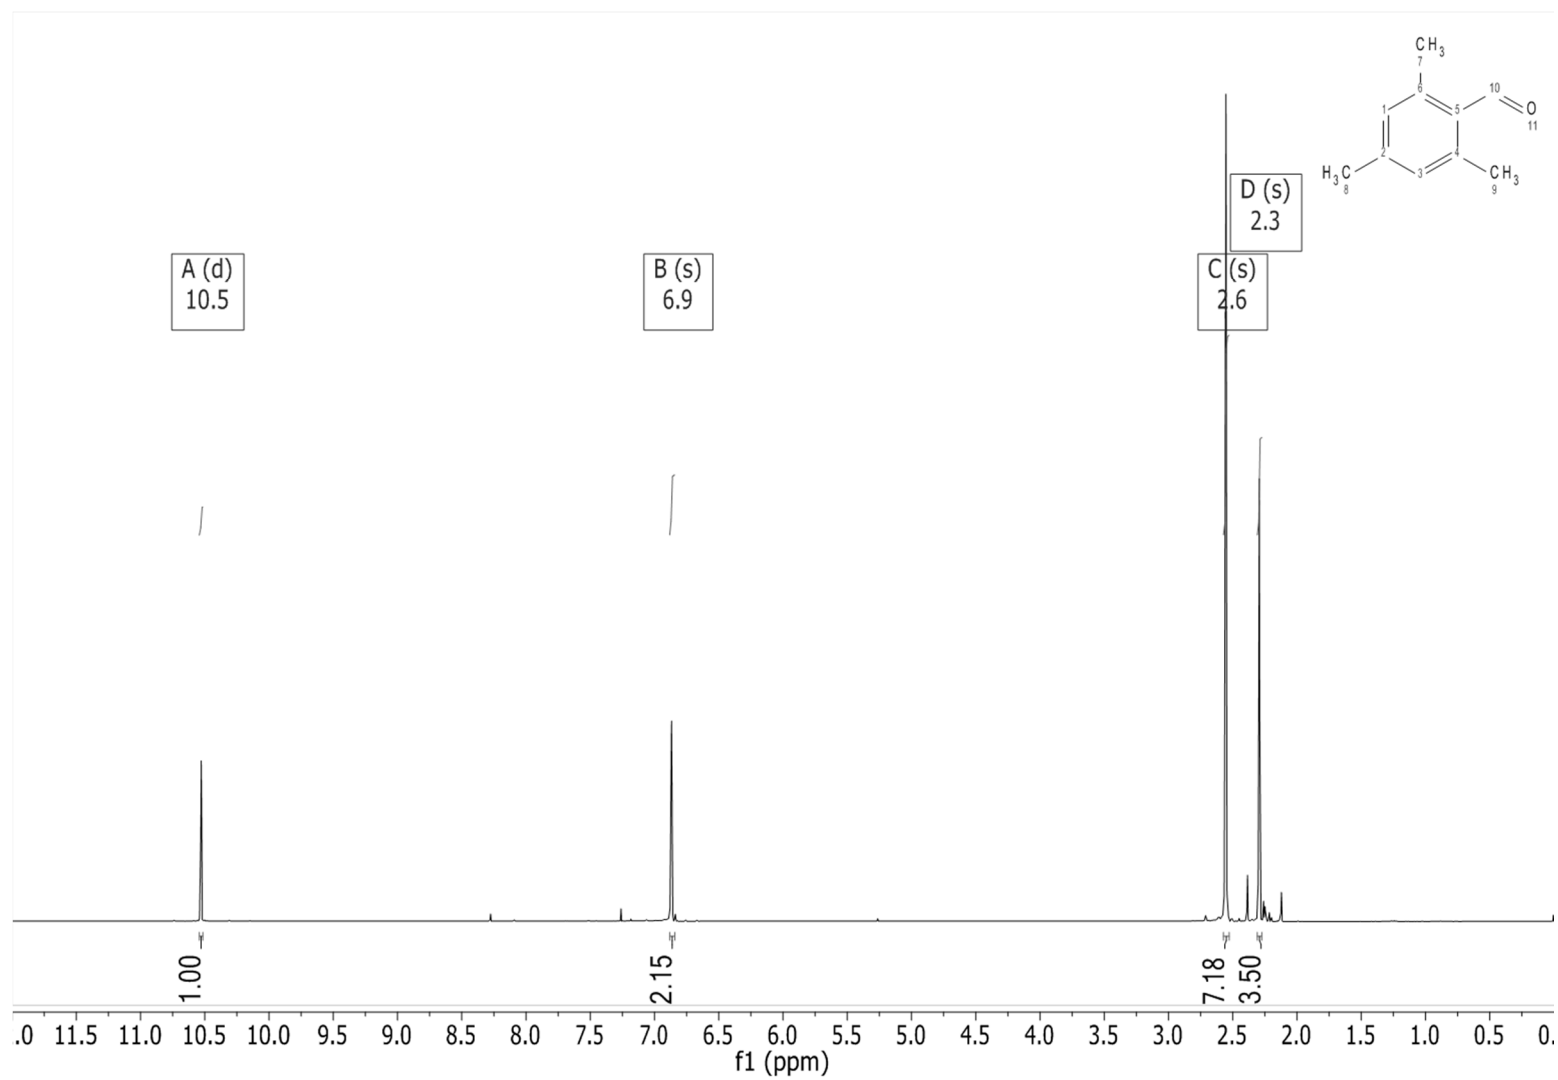**Figure 33.**  $^1\text{H}$ -NMR (400 MHz,  $\text{CDCl}_3$ ): **26**.

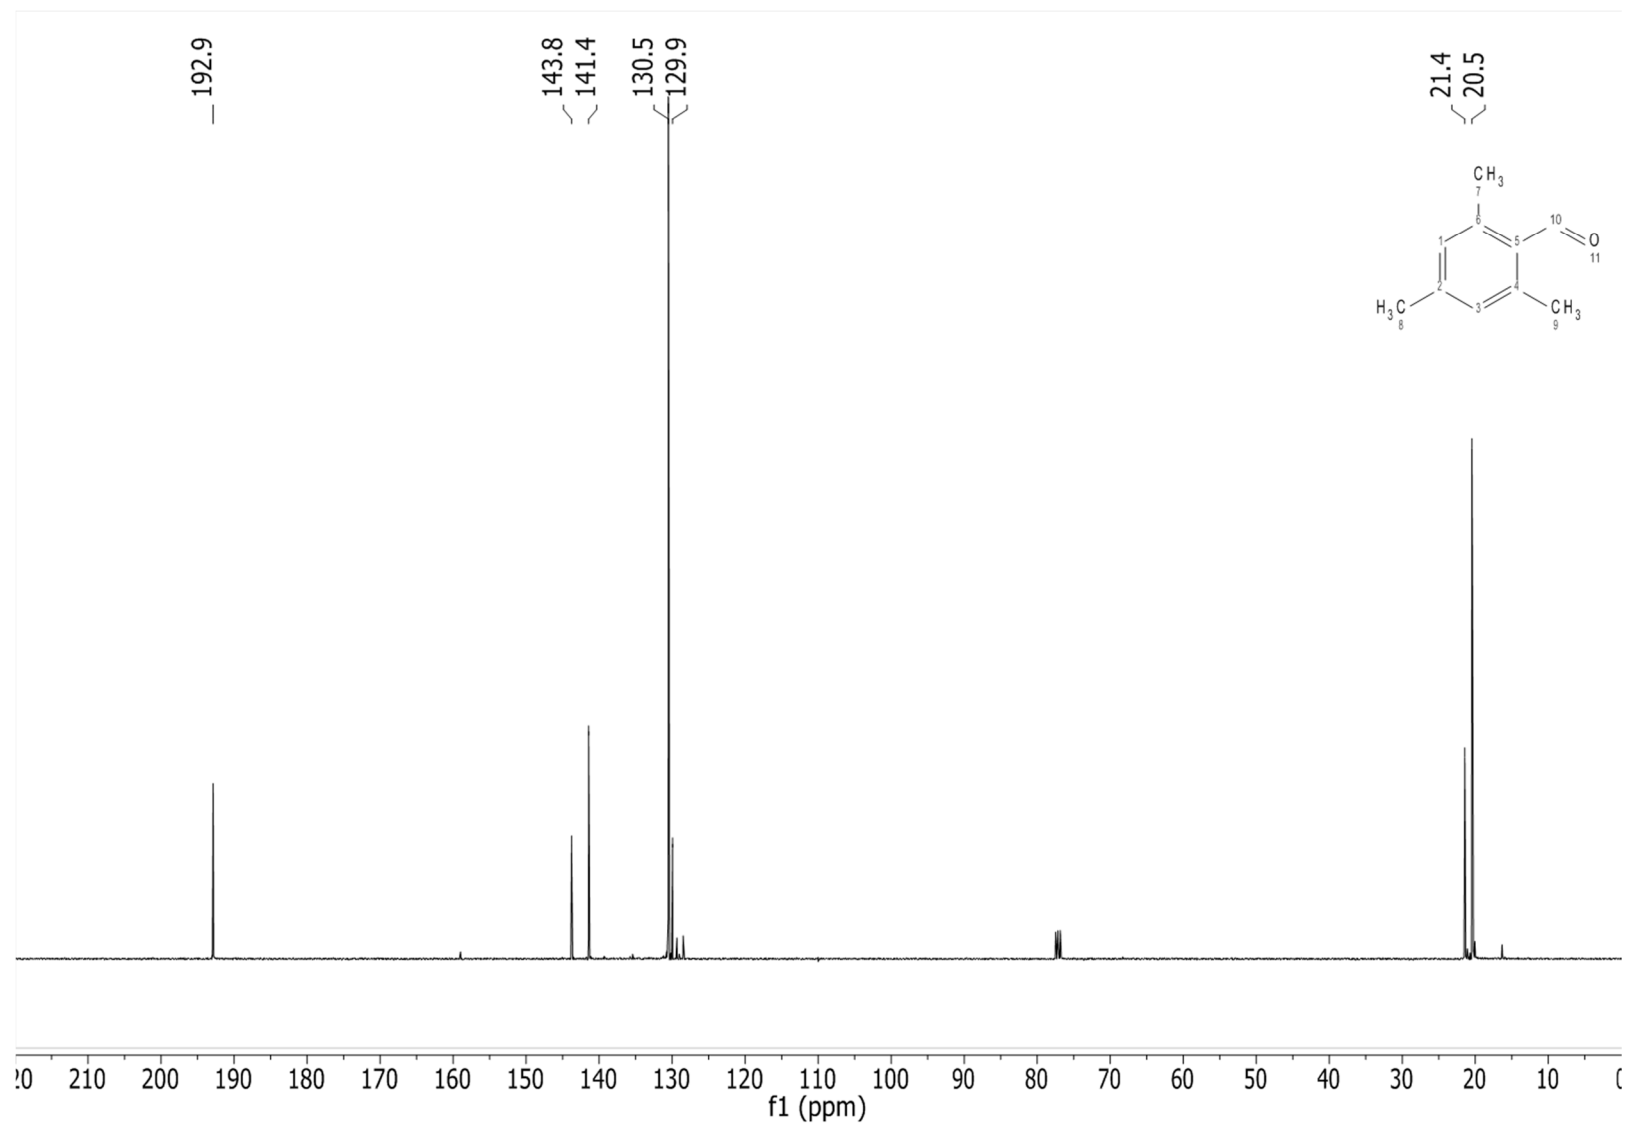

**Figure S34.**  $^{13}\text{C}$ -NMR (100 MHz,  $\text{CDCl}_3$ ): **26**.

## 2. High performance liquid chromatography (HPLC): Reaction crudes

### ➤ Entry 1: Reaction with phenol

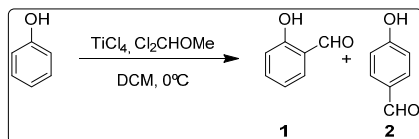

### HPLC crude:

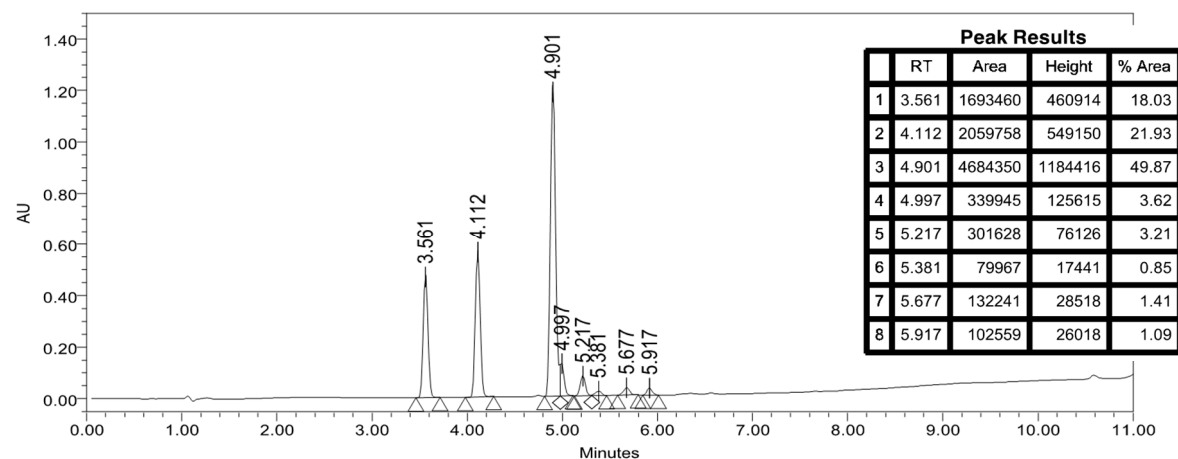

$t_R = 3.56 \text{ min} \rightarrow 4\text{-hydroxybenzaldehyde (2)}$ ;  $t_R = 4.11 \text{ min} \rightarrow \text{phenol (starting material)}$ ;  $t_R = 4.90 \text{ min} \rightarrow 2\text{-hydroxybenzaldehyde(1)}$

### UV-Vis:

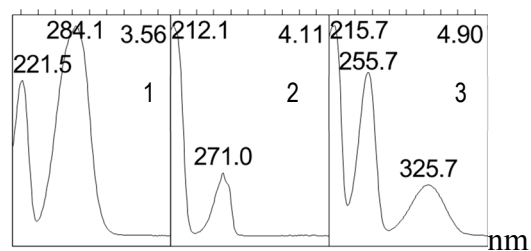

## Entry 2: Reaction with 3-methylphenol

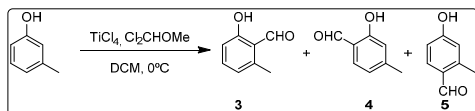

## HPLC crude:

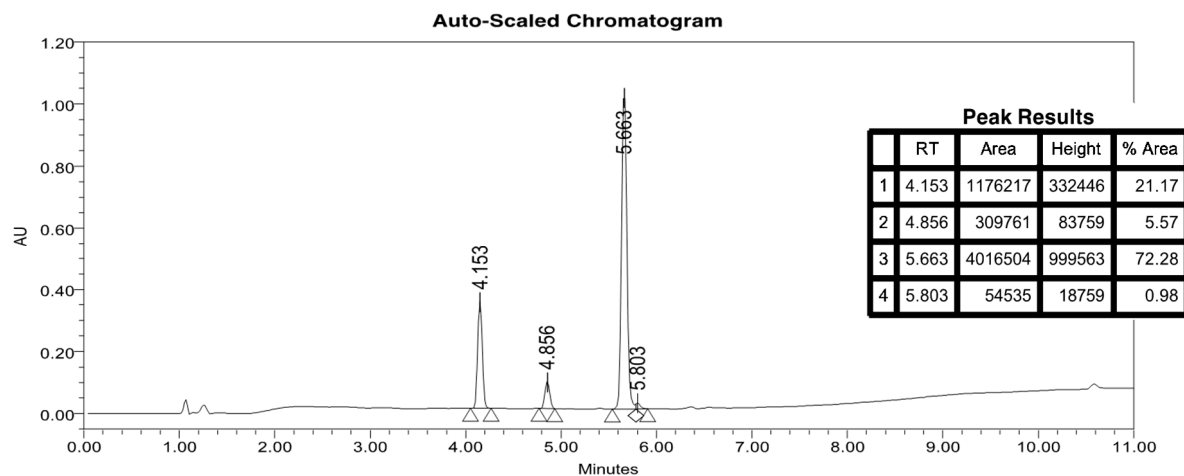

$t_R = 4.15 \text{ min} \rightarrow$  4-hydroxy-2-methylbenzaldehyde (5);  $t_R = 4.86 \text{ min} \rightarrow$  3-methylphenol (starting material);  
 $t_R = 5.66 \text{ min} \rightarrow$  2-hydroxy-6-methylbenzaldehyde (3) + 2-hydroxy-4-methylbenzaldehyde (4).

## UV-VIS:

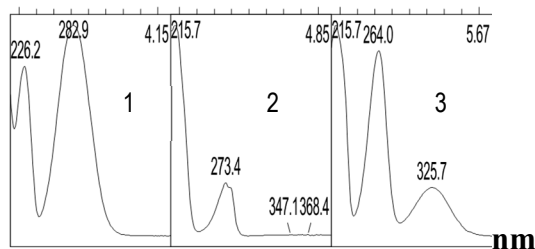

➤ **Entry 3: Reaction with 3-methoxyphenol:**

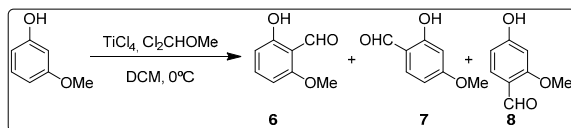

**HPLC crude:**

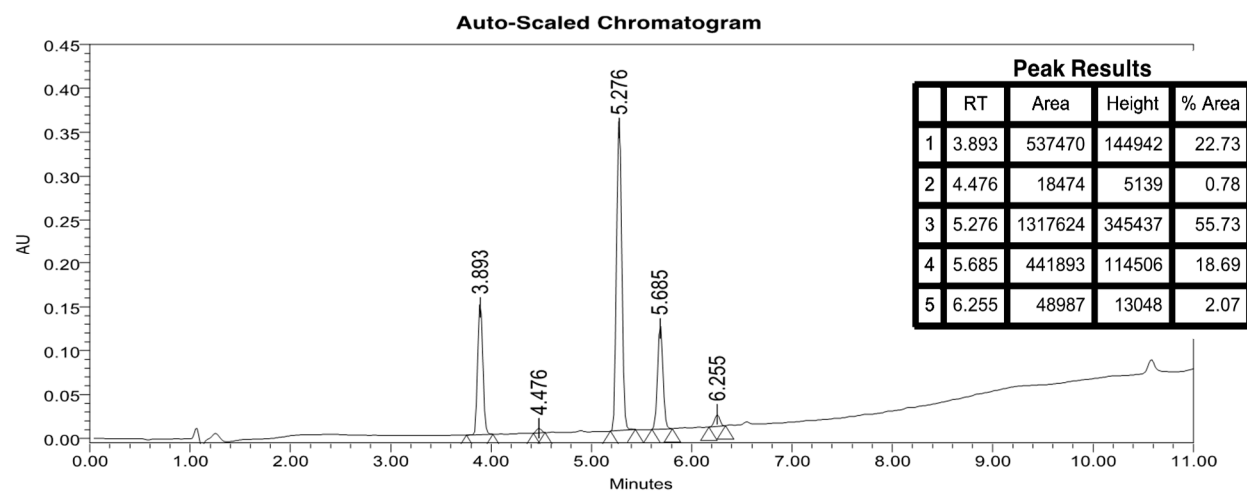

$t_R = 3.89 \text{ min} \rightarrow 4\text{-hydroxy-2-methoxybenzaldehyde (8)}$ ;  $t_R = 5.28 \text{ min} \rightarrow 2\text{-hydroxy-4-methoxybenzaldehyde (7)}$ ;  
 $t_R = 5.69 \text{ min} \rightarrow 2\text{-hydroxy-6-methoxybenzaldehyde (6)}$ .

**UV-VIS:**

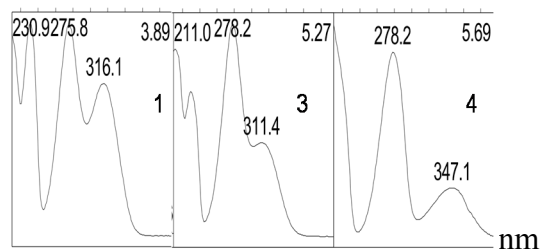

➤ **Entry 4: Reaction with 3,5-dimethylphenol:**

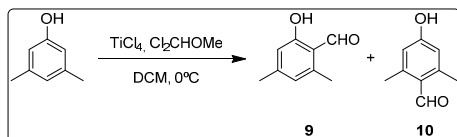

**HPLC crude:**

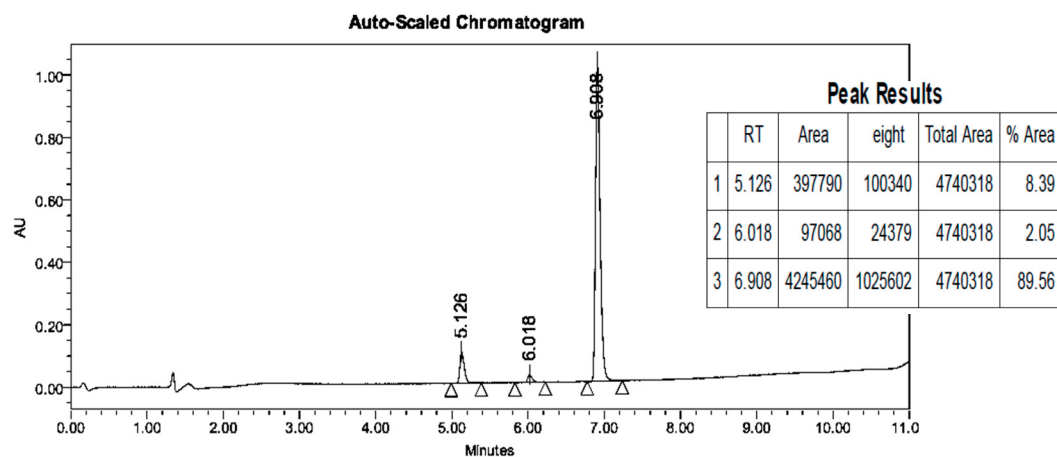

$t_R = 5.13 \text{ min} \rightarrow$  4-hydroxy-2,6-dimethylbenzaldehyde (10);  $t_R = 6.02 \text{ min} \rightarrow$  3,5-dimethylphenol (starting material);  
 $t_R = 6.91 \text{ min} \rightarrow$  2-hydroxy-4,6-dimethylbenzaldehyde (9).

**UV-VIS:**

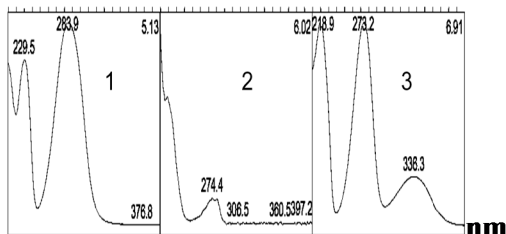

**Entry 5: Reaction with 3,5-dimethoxyphenol:**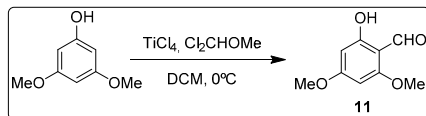**HPLC crude:**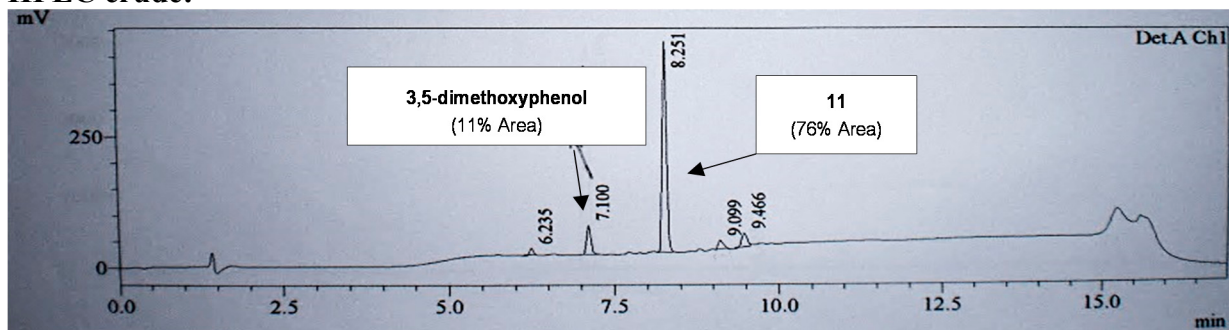

HPLC B\* (X-Bridge,  $\text{C}_{18}$ , 5-100% ACN,  $t = 11$  min)

**➤ Entry 6: Reaction with 3,4,5-trimethoxyphenol:**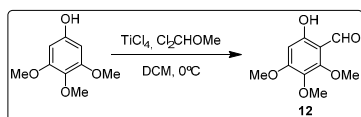**HPLC crude:**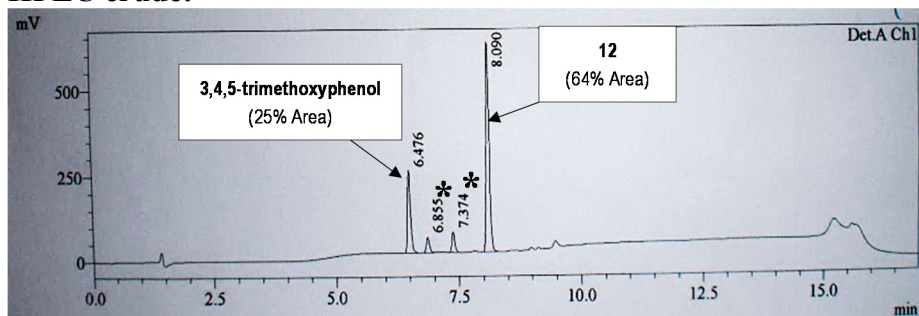

\* Impurities from the starting material. HPLC B\* (X-Bridge,  $\text{C}_{18}$ , 5-100% ACN,  $t = 11$  min).

➤ **Entry 7: Reaction with anisole:**

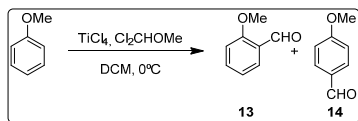

**HPLC Crude:**

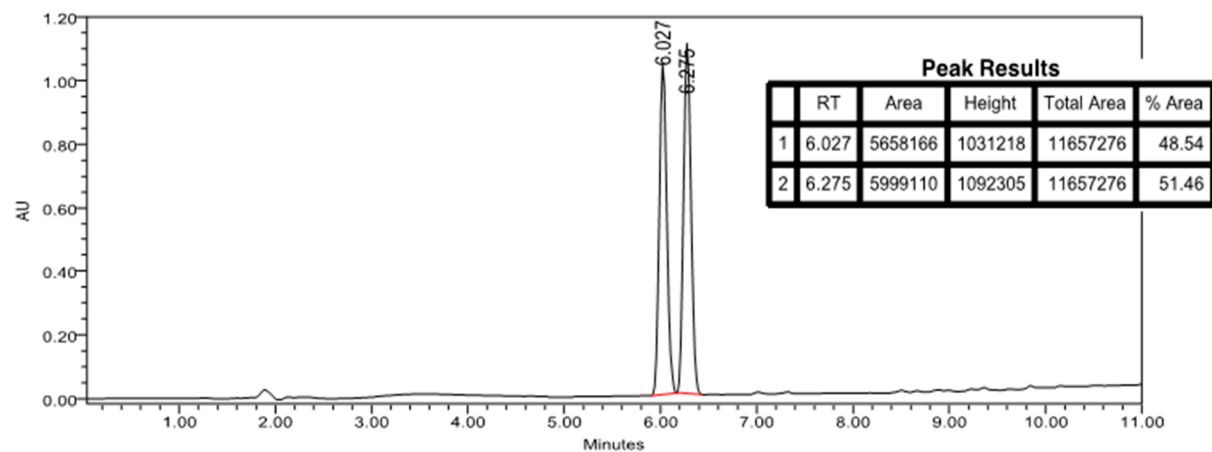

$t_R = 6.03 \text{ min} \rightarrow$  2-methoxybenzaldehyde (**13**);  $t_R = 6.28 \text{ min} \rightarrow$  4-methoxybenzaldehyde (**14**).

**UV-Vis:**

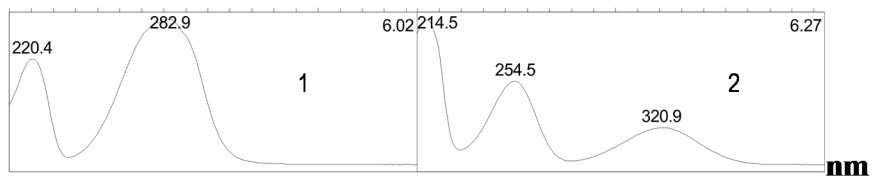

➤ **Entry 8: Reaction with 1,3-dimethoxybenzene:**

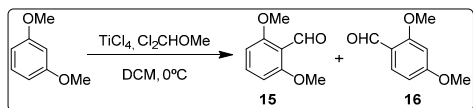

**HPLC Crude:**

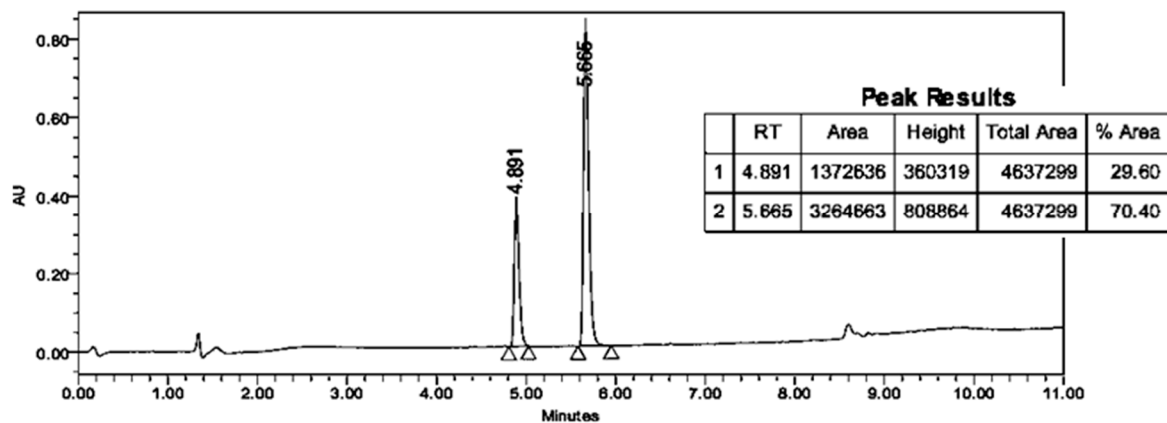

$t_R = 4.89 \text{ min} \rightarrow 2,6\text{-dimethoxybenzaldehyde (15)}$ ;  $t_R = 5.67 \text{ min} \rightarrow 2,4\text{-dimethoxybenzaldehyde (16)}$

**UV-Vis:**

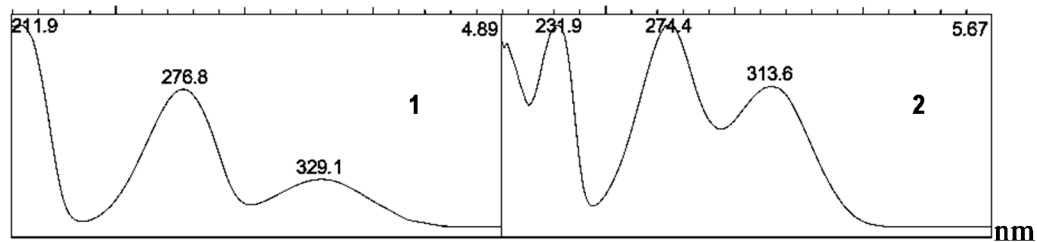

➤ **Entry 9: Reaction with 1,3,5-trimethoxybenzene:**

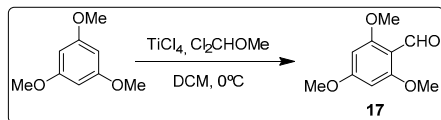

**HPLC crude:**

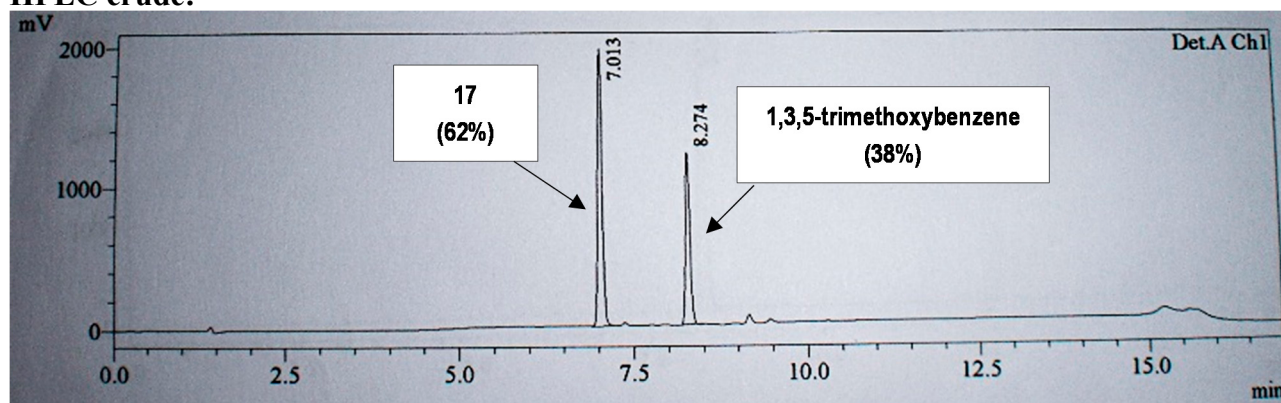

HPLC B\* (X-Bridge,  $\text{C}_{18}$ , 5-100% ACN,  $t = 11$  min)

➤ **Entry 10: Reaction with 3,5-dimethylanisole:**

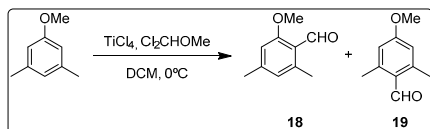

**HPLC Crude:**

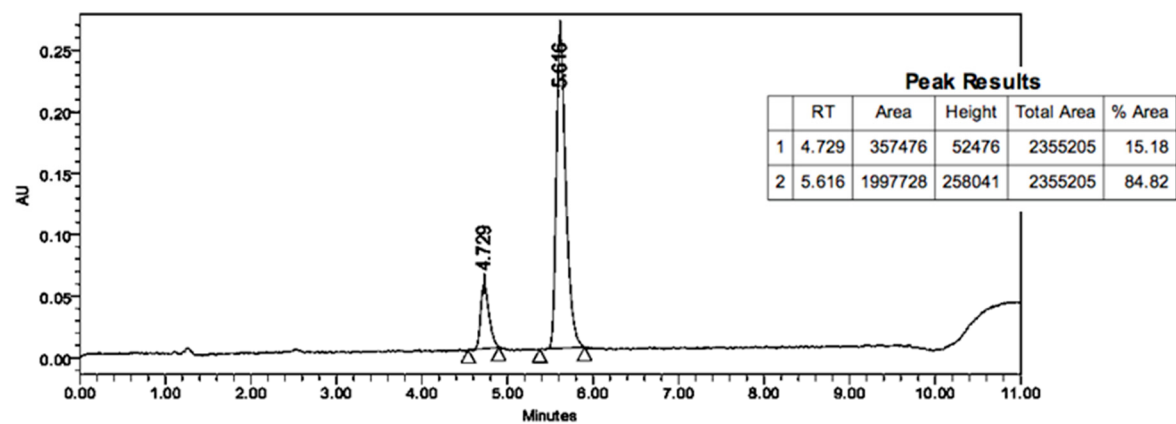

$t_R = 4.73 \text{ min} \rightarrow$  4-methoxy-2,6-dimethylbenzaldehyde (**19**);  $t_R = 5.62 \text{ min} \rightarrow$  2-methoxy-4,6-dimethylbenzaldehyde (**18**).

**UV-Vis:**

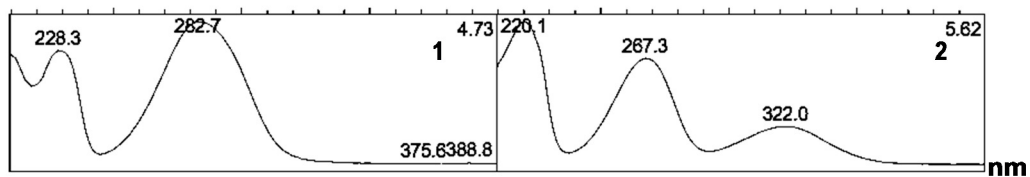

➤ **Entry 11: Reaction with *o*-xylene:**

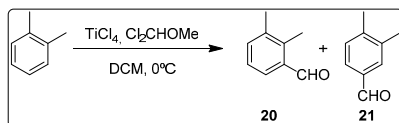

**HPLC crude:**

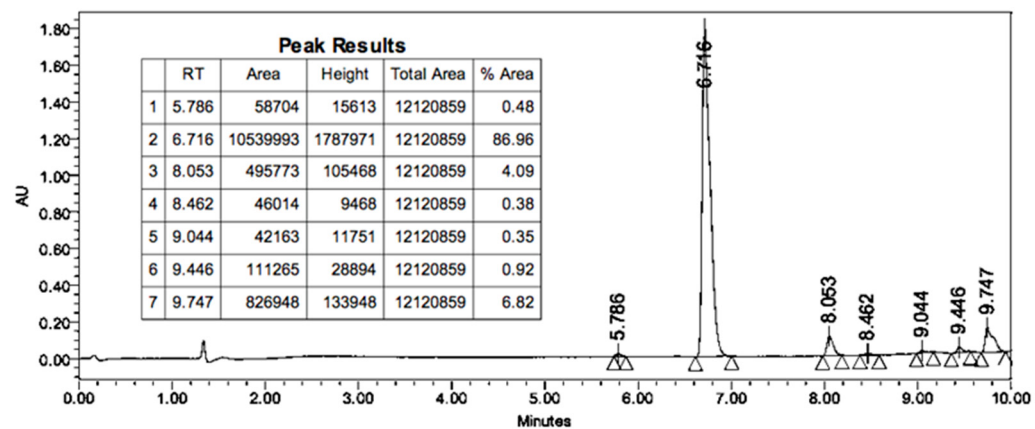

$t_R = 6.72 \text{ min} \rightarrow$  Regioisomers mixture (**20** and **21**);  $t_R = 8.05 \text{ min} \rightarrow$  Dimerization products (HPLC-MS: observed = 223.26  $m/z$  correspond to  $[\text{M-OH}]^+$ )

**UV-Vis:**

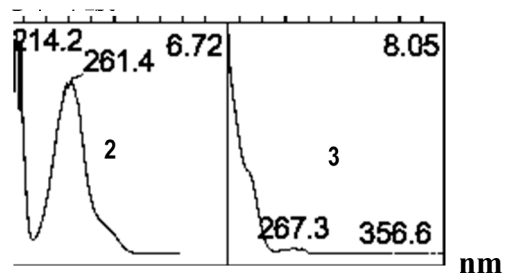

➤ **Entry 12: Reaction with *m*-xylene:**

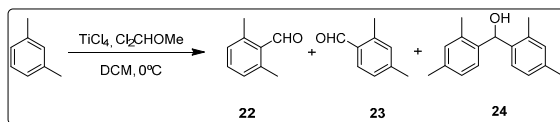

**HPLC Crude:**

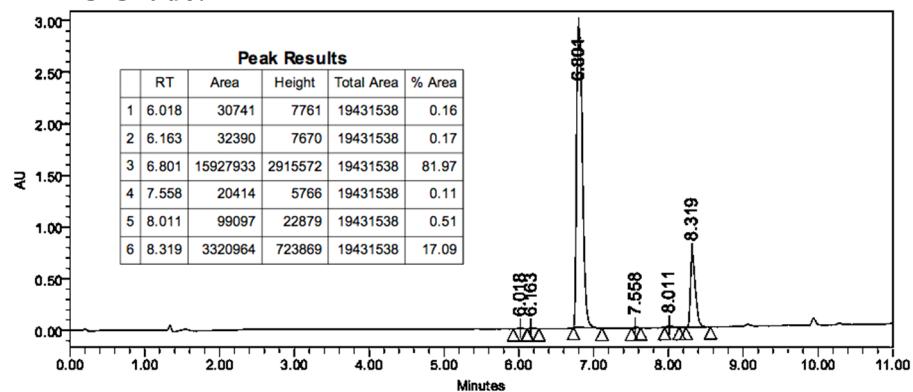

$t_R = 6.801$  min  $\rightarrow$  Regioisomeric mixture (**22** and **23**),  $t_R = 8.319$  min  $\rightarrow$  bis(2,4-dimethylphenyl)methanol (**24**) (HPLC-MS: observed 223.26  $m/z$  corresponding to  $[\text{M-OH}]^+$ )

**UV-Vis:**

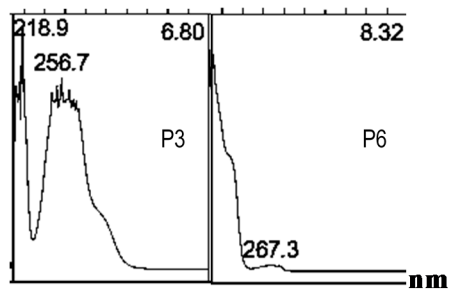

➤ **Entry 13: Reaction with *p*-xylene:**

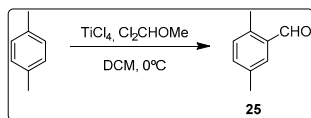

**HPLC crude:**

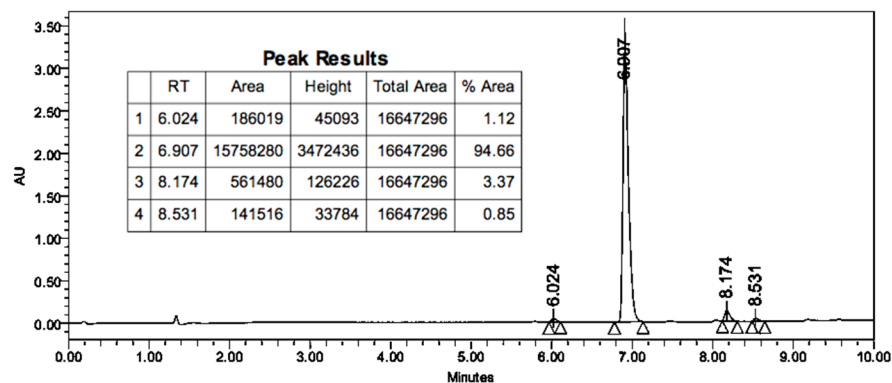

$t_R = 6.91 \text{ min} \rightarrow$  2,5-dimethylbenzaldehyde (**25**),  $t_R = 8.17 \text{ min} \rightarrow$  dimerization product (HPLC-MS: observed  $223.26 \text{ } m/z$  corresponding to  $[\text{M-OH}]^+$ )

**UV-Vis:**

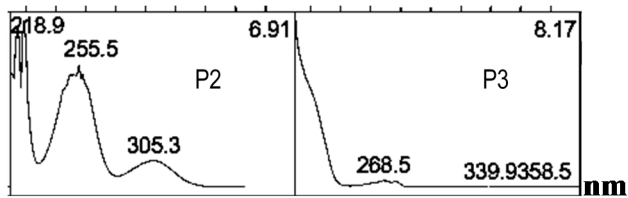

➤ **Entry 14: Reaction with mesitylene:**

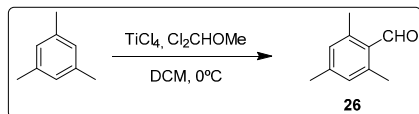

HPLC crude (g30→100 t8 min):

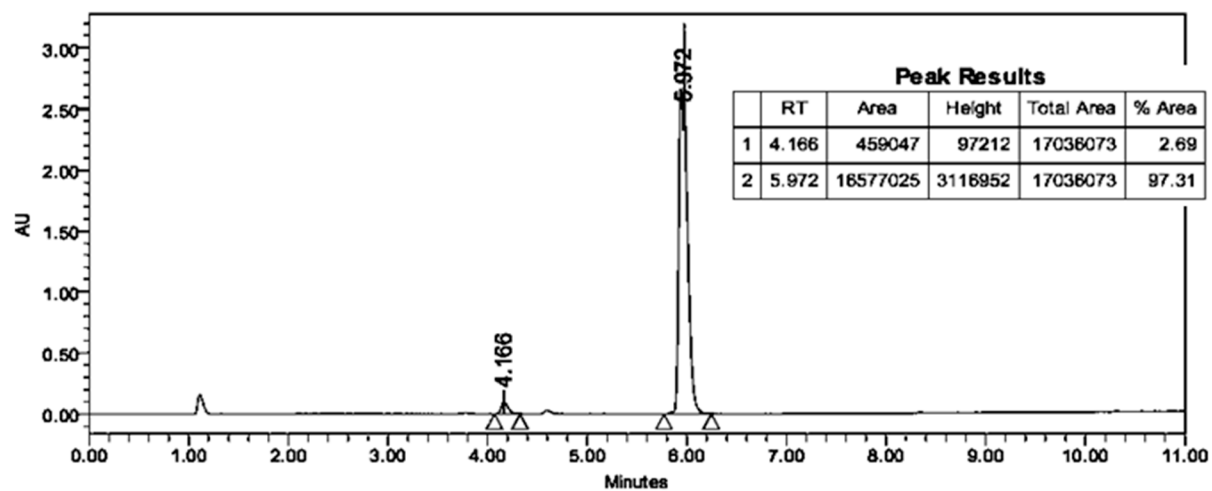

$t_R = 4.17 \text{ min} \rightarrow$  No identified.  $t_R = 5.97 \text{ min} \rightarrow$  2,4,6-trimethylbenzaldehyde (26)

UV-Vis:

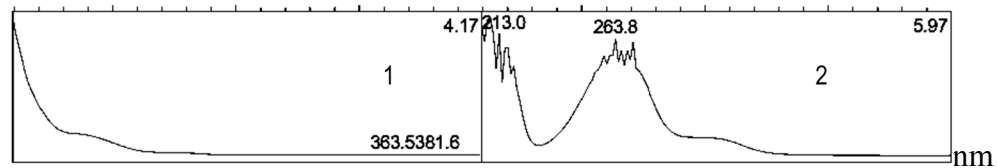

## 3. Resume tables of formylation reactions.

Table S1. Resume table of phenol formylation.

| Entry          | Compound |                                | Crude purity (% HPLC)                                                                | Product purity (% HPLC)              | Yield (%)                             |
|----------------|----------|--------------------------------|--------------------------------------------------------------------------------------|--------------------------------------|---------------------------------------|
| <b>Phenols</b> |          |                                |                                                                                      |                                      |                                       |
| 1              | 1        | 2-hydroxybenzaldehyde          | 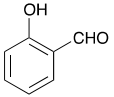  | 18.0 ( $t_R = 3.6$ min) <sup>1</sup> | —                                     |
|                | 2        | 4-hydroxybenzaldehyde          | 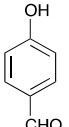  | 49.9 ( $t_R = 4.9$ min) <sup>1</sup> | >99                                   |
| 2              | 4        | 2-hydroxy-4-methylbenzaldehyde | 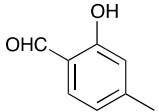  | 72.3 ( $t_R = 5.7$ min) <sup>1</sup> | 98.8                                  |
|                | 3        | 2-hydroxy-6-methylbenzaldehyde | 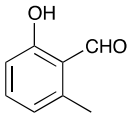  |                                      | 56<br>(3:1.6:1)<br>[5.6] <sup>2</sup> |
|                | 5        | 4-hydroxy-2-methylbenzaldehyde | 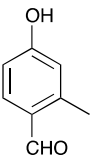 | 21.2 ( $t_R = 4.2$ min) <sup>1</sup> | >99                                   |

Table S1. *Cont.*

| Entry          | Compound |                                    | Crude purity (% HPLC)                                                                | Product purity (% HPLC)              | Yield (%)         |
|----------------|----------|------------------------------------|--------------------------------------------------------------------------------------|--------------------------------------|-------------------|
| <b>Phenols</b> |          |                                    |                                                                                      |                                      |                   |
| 3              | 6        | 6-hydroxy-2-methoxybenzaldehyde    | 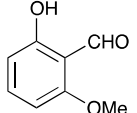  | 22.7 ( $t_R = 3.9$ min) <sup>1</sup> | 19.9              |
|                | 7        | 2-hydroxy-4-methoxybenzaldehyde    | 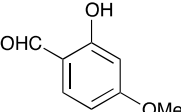  | 55.7 ( $t_R = 5.3$ min) <sup>1</sup> | 61<br>(1.3:3.7:1) |
|                | 8        | 4-hydroxy-2-methoxybenzaldehyde    | 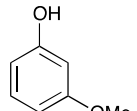  | 18.7 ( $t_R = 5.7$ min) <sup>1</sup> | 96.4              |
| 4              | 9        | 2-hydroxy-4,6-dimethylbenzaldehyde | 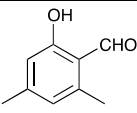  | 89.9 ( $t_R = 6.9$ min) <sup>1</sup> | 78<br>(5:1)       |
|                | 10       | 4-hydroxy-2,6-dimethylbenzaldehyde | 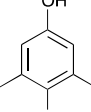 | 8.2 ( $t_R = 5.1$ min) <sup>1</sup>  |                   |

Table S1. *Cont.*

| Entry          | Compound                                  |  | Crude purity (% HPLC)                                                  | Product purity (% HPLC) | Yield (%)                 |
|----------------|-------------------------------------------|--|------------------------------------------------------------------------|-------------------------|---------------------------|
| <b>Phenols</b> |                                           |  |                                                                        |                         |                           |
| 5              | 11 6-hydroxy-2,4-dimethoxybenzaldehyde    |  | 77.8 ( $t_R = 8.3$ min) <sup>4</sup>                                   | 99.3                    | 63<br>(11.1) <sup>2</sup> |
|                | 4-hydroxy-2,6- dimethoxybenzaldehyde      |  | 2.6 ( $t_R = 6.2$ min) <sup>4</sup><br>( $t_R = 6.0$ min) <sup>3</sup> | —                       | —                         |
| 6              | 12 6-hydroxy-2,3,4-trimethoxybenzaldehyde |  | 63.5 ( $t_R = 8.1$ min) <sup>4</sup>                                   | 96.8                    | 56<br>(25.3) <sup>2</sup> |

<sup>1</sup> HPLC: G05→100 (X-Bridge, C<sub>18</sub>, 8 min); <sup>2</sup> starting material; <sup>3</sup> HPLC-MS: G05→100 (SunFire C<sub>18</sub>, 8 min); <sup>4</sup> HPLC: G05→100 (X-Bridge, C<sub>18</sub>, 11 min).

**Table S2.** Resume table of methoxybenzene formylation.

| Entry                  | Compound |                           | Crude purity (% HPLC)                                                               | Product purity (% HPLC)                | Yield (%) |
|------------------------|----------|---------------------------|-------------------------------------------------------------------------------------|----------------------------------------|-----------|
| <b>Methoxybenzenes</b> |          |                           |                                                                                     |                                        |           |
| 7                      | 13       | 2-methoxybenzaldehyde     | 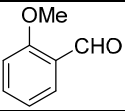 | 48.5% ( $t_R = 6.0$ min) <sup>1</sup>  | —         |
|                        | 14       | 4-methoxybenzaldehyde     | 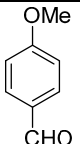 | 51.5% ( $t_R = 6.3$ min) <sup>1</sup>  | —         |
| 8                      | 15       | 2,6-dimethoxybenzaldehyde | 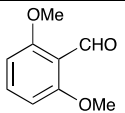 | 29.6% ( $t_R = 4.9$ min) <sup>1</sup>  | >99%      |
|                        | 16       | 2,4-dimethoxybenzaldehyde | 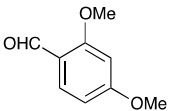 | 70.4% ( $t_R = 5.67$ min) <sup>1</sup> | >99%      |

97  
(1:1.1)79  
(1:3)

Table S2. *Cont.*

| Entry                  |    | Compound                           |                                                                                     | Crude purity (% HPLC)                 | Product purity (% HPLC) | Yield (%)                  |
|------------------------|----|------------------------------------|-------------------------------------------------------------------------------------|---------------------------------------|-------------------------|----------------------------|
| <b>Methoxybenzenes</b> |    |                                    |                                                                                     |                                       |                         |                            |
| 9                      | 17 | 2,4,6-trimethoxybenzaldehyde       | 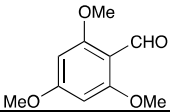 | 61.8% ( $t_R = 7.0$ min) <sup>4</sup> | 95.6%                   | 44<br>(38.2%) <sup>2</sup> |
| 10                     | 18 | 2-methoxy-4,6-dimethylbenzaldehyde | 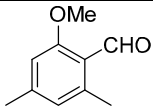 | 83.8% ( $t_R = 7.0$ min) <sup>1</sup> | >99%                    | 19<br>(3.5:1)              |
|                        | 19 | 4-methoxy-2,6-dimethylbenzaldehyde | 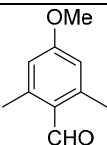 | 16.2% ( $t_R = 6.7$ min) <sup>1</sup> | >99%                    |                            |

<sup>1</sup> HPLC: G05→100 (X-Bridge, C<sub>18</sub>, 8 min); <sup>2</sup> starting material; <sup>4</sup> HPLC: G05→100 (X-Bridge, C<sub>18</sub>, 11 min).

**Table S3.** Resume table of methylbenzene formylation.

| Entry                 | Compound |                                 | Crude purity (% HPLC)                 | Product purity (% HPLC) | Yield (%)                          |
|-----------------------|----------|---------------------------------|---------------------------------------|-------------------------|------------------------------------|
| <b>Methylbenzenes</b> |          |                                 |                                       |                         |                                    |
| 11                    | 20       | 2,3-dimethylbenzaldehyde        | 89.2% ( $t_R$ = 6.7 min) <sup>1</sup> | 99.4%                   | 70<br>(3.2:1)                      |
|                       | 21       | 3,4-dimethylbenzaldehyde        |                                       |                         |                                    |
|                       | -        | bis(2,3-dimethylphenyl)methanol | 4.4% ( $t_R$ = 8.1 min) <sup>1</sup>  | —                       | —                                  |
|                       | -        | bis(3,4-dimethylphenyl)methanol |                                       |                         |                                    |
| 12                    | 22       | 2,6-dimethylbenzaldehyde        | 82.0% ( $t_R$ = 6.8 min) <sup>1</sup> | 98.9%                   | 62<br>(1:32)<br>[0.5] <sup>2</sup> |
|                       | 23       | 2,4-dimethylbenzaldehyde        |                                       |                         |                                    |
|                       | 24       | bis(2,4-dimethylphenyl)methanol | 17.1% ( $t_R$ = 8.3 min) <sup>1</sup> | 97.0%                   | 9.9                                |

Table S3. *Cont.*

| Entry          | Compound |                                 | Crude purity (% HPLC)                                                              | Product purity (% HPLC)                                                  | Yield (%) |
|----------------|----------|---------------------------------|------------------------------------------------------------------------------------|--------------------------------------------------------------------------|-----------|
| Methylbenzenes |          |                                 |                                                                                    |                                                                          |           |
| 13             | 25       | 2,5-dimethylbenzaldehyde        | 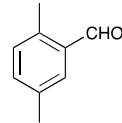 | 94.7% ( $t_R = 6.9$ min) <sup>1</sup>                                    | —         |
|                | -        | bis(2,5-dimethylphenyl)methanol | 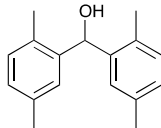 | 3.4% ( $t_R = 8.2$ min) <sup>1</sup><br>( $t_R = 10.5$ min) <sup>3</sup> | —         |
| 14             | 26       | 2,4,6-trimethylbenzaldehyde     | 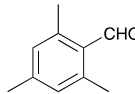 | 96.7%<br>( $t_R = 5.97$ min) <sup>5</sup>                                | —         |

<sup>1</sup> HPLC: G05→100 (X-Bridge, C<sub>18</sub>, 8 min); <sup>2</sup> starting material; <sup>3</sup> HPLC-MS: G05→100 (SunFire C<sub>18</sub>, 8 min); <sup>5</sup> HPLC: G30→100 (X-Bridge, C<sub>18</sub>, 8 min).
